1 **A conserved MFS orchestrates a subset of O-glycosylation to facilitate macrophage**  
2 **dissemination and tissue invasion**

3

4 **Katarína Valošková<sup>1§</sup>, Julia Biebl<sup>1§</sup>, Marko Roblek<sup>1</sup>, Shamsi Emtenani<sup>1</sup>, Attila**  
5 **Gyoergy<sup>1</sup>, Michaela Mišová<sup>1</sup>, Aparna Ratheesh<sup>1</sup>, Kateryna Shkarina<sup>1,3</sup>, Ida S.B.**  
6 **Larsen<sup>2</sup>, Sergey Y. Vakhrushev<sup>2</sup>, Henrik Clausen<sup>2</sup>, Daria E. Siekhaus<sup>1\*</sup>**

7

8 **SUMMARY**

9 Aberrant display of the truncated core1 O-glycan T-antigen is a common feature of  
10 human cancer cells that correlates with metastasis. Here we show that T-antigen in  
11 *Drosophila melanogaster* macrophages is involved in their developmentally programmed  
12 tissue invasion. Higher macrophage T-antigen levels require an atypical major facilitator  
13 superfamily (MFS) member that we named Minerva which enables macrophage  
14 dissemination and invasion. We characterize for the first time the T and Tn glycoform O-  
15 glycoproteome of the *Drosophila melanogaster* embryo, and determine that Minerva  
16 increases the presence of T-antigen on protein pathways previously linked to cancer,  
17 most strongly on the protein sulfhydryl oxidase Qsox1 which we show is required for  
18 macrophage invasion. Minerva's vertebrate ortholog, MFSD1, rescues the *minerva*  
19 mutant's migration and T-antigen glycosylation defects. We thus identify a key  
20 conserved regulator that orchestrates O-glycosylation on a protein subset to activate a  
21 program governing migration steps important for both development and cancer  
22 metastasis.

23

24 §: These authors contributed equally

25 \*- Corresponding author and lead contact, [daria.siekhaus@ist.ac.at](mailto:daria.siekhaus@ist.ac.at)

26 *1 – Institute of Science and Technology Austria, Am Campus 1, 3400 Klosterneuburg,*  
27 *Austria*

28 *2 - Copenhagen Center for Glycomics, Departments of Cellular and Molecular Medicine,*  
29 *Faculty of Health Sciences, University of Copenhagen, Blegdamsvej 3B, DK-2200*  
30 *Copenhagen N, Denmark*

31 *3- Current address: University of Lausanne, Department of Biochemistry, Chemin des*  
32 *Boveresses 155-CP51-CH-1066 Epalinges, Switzerland*

33

34

## 35 **INTRODUCTION**

36

37 The set of proteins expressed by a cell defines much of its potential capacities. However,  
38 a diverse set of modifications can occur after the protein is produced to alter its function  
39 and thus determine the cell's final behavior. One of the most frequent, voluminous and  
40 variable of such alterations is glycosylation, in which sugars are added onto the oxygen  
41 (O) of a serine or threonine or onto the nitrogen (N) of an asparagine (Kornfeld and  
42 Kornfeld, 1985; Marshall, 1972; Ohtsubo and Marth, 2006). O-linked addition can occur  
43 on cytoplasmic and nuclear proteins in eukaryotes (Comer and Hart, 2000; Hart et al.,  
44 2011), but the most extensive N- and O- linked glycosylation occurs during the transit of  
45 a protein through the secretory pathway. A series of sugar molecules are added starting in  
46 the endoplasmic reticulum (ER) or cis-Golgi and continuing to be incorporated and  
47 removed until passage through the trans Golgi network is complete (Aebi, 2013; Stanley  
48 et al., 2009). N-linked glycosylation is initiated in the ER at consensus NxS/T X≠P site,  
49 whereas the most common GalNAc-type O-linked glycosylation is initiated in the early  
50 Golgi and glycosites display no clear sequence motifs, apart from a prevalence of  
51 neighboring prolines (Bennett et al., 2012; Christlet and Veluraja, 2001). Glycosylation  
52 can affect protein folding, stability and localization as well as serve specific roles in fine-  
53 tuning protein processing and functions such as protein adhesion and signaling (Goth et  
54 al., 2018; Varki, 2017). The basic process by which such glycosylation occurs has been  
55 well studied. However our understanding of how specific glycan structures participate in  
56 modulating particular cellular functions is still at its beginning.

57 The need to understand the regulation of O-glycosylation is particularly relevant  
58 for cancer (Fu et al., 2016; Häuselmann and Borsig, 2014). The truncated O-glycans  
59 called T and Tn antigen are not normally found on most mature human cells (Cao et al.,  
60 1996) but up to 95% of cells from many cancer types display these at high levels (Boland  
61 et al., 1982; Cao et al., 1996; Howard and Taylor, 1980; Limas and Lange, 1986; Orntoft

62 et al., 1985; Springer, 1984; Springer et al., 1975). The T O-glycan structure (Gal $\beta$ 1-  
63 3GalNAc $\alpha$ 1-O-Ser/Thr) is synthesized by the large family of polypeptide GalNAc-  
64 transferases (GalNAc-Ts) that initiate protein O-glycosylation by adding GalNAc to form  
65 Tn antigen and the core1 synthase C1GalT1 that adds Gal to the initial GalNAc residues  
66 (Tian and Ten Hagen, 2009) to form T antigen (**Fig 1A**). The human C1GalT1 synthase  
67 requires a dedicated chaperone, COSMC, for folding and ER exit (Ju and Cummings,  
68 2005). In adult humans these O-glycans are normally capped by sialic acids and/or  
69 elongated and branched into complex structures (Tarp and Clausen, 2008). However, in  
70 cancer this elongation and branching is reduced or absent and the appearance of these  
71 truncated T and Tn O-glycans correlates positively with cancer aggressiveness and  
72 negatively with long-term prognoses for many cancers in patients (Baldus et al., 2000;  
73 Carrasco et al., 2013; Ferguson et al., 2014; MacLean and Longenecker, 1991;  
74 Schindlbeck et al., 2005; Springer, 1997, 1989; Summers et al., 1983; Yu et al., 2007).  
75 The molecular basis for the enhanced appearance of T antigen in cancers is not clear  
76 (Chia et al., 2016), although higher Golgi pH in cancer cells correlates with increases in T  
77 antigen (Kellokumpu, Sormunen and Kellokumpu, 2002). Interestingly, T antigen is also  
78 observed as a transient fetal modification (Barr et al., 1989) and cancer cells frequently  
79 recapitulate processes that happened earlier in development (Cofre and Abdelhay, 2017;  
80 Pierce, 1974). Identifying new mechanisms that regulate T antigen modifications  
81 developmentally has great potential to lead to important insights into cancer biology.

82 *Drosophila* as a classic genetic model system is an excellent organism in which to  
83 investigate these questions. *Drosophila* displays T antigen as the predominant form of  
84 GalNAc-, or mucin-type, O-glycosylation in the embryo with 18% of the T glycans being  
85 further elaborated, predominantly by the addition of GlcA (Aoki et al., 2008). As in  
86 vertebrates, the GalNAc-T isoenzymes directing the initial step of GalNAc addition to  
87 serines and threonines are numerous, with several already known to display conserved  
88 substrate specificity *in vitro* with vertebrates (Müller et al., 2005; Schwientek et al., 2002;  
89 Ten Hagen et al., 2003). The *Drosophila* GalNAc-Ts affect extracellular matrix (ECM)  
90 secretion, gut acidification and the formation of the respiratory system (Tian and Ten  
91 Hagen, 2006; Tran et al., 2012; Zhang et al., 2010). In flies the main enzyme adding Gal  
92 to form T antigen is C1GalTA (Müller et al., 2005) whose absence causes defects in

93 ventral nerve cord (vnc) condensation during Stage 17, hematopoietic stem cell  
94 maintenance, and neuromuscular junction formation (Fuwa et al., 2015; Itoh et al., 2016;  
95 Lin et al., 2008; Yoshida et al., 2008). While orthologous to the vertebrate Core1  
96 synthases, the *Drosophila* C1GALTs differ in not requiring a specific chaperone (Müller  
97 et al., 2005). Most interestingly, the T antigen is found on embryonic macrophages  
98 (Yoshida et al., 2008), a cell type which can penetrate into tissues in a manner akin to  
99 metastatic cancer (Ratheesh et al., 2018; Siekhaus et al., 2010). Macrophage invasion of  
100 the germband (**Fig 1B**, arrow in **Fig 1C**) occurs between the closely apposed ectoderm  
101 and mesoderm (Ratheesh et al., 2018; Siekhaus et al., 2010) from late Stage 11 through  
102 Stage 12 during the dispersal of macrophages throughout the embryo (**Fig 1C**) along  
103 routes that are mostly noninvasive, such as along the inner ventral nerve cord (vnc)  
104 (arrowhead in **Fig 1C**) (Campos-Ortega and Hartenstein, 1997; Evans et al., 2010). Given  
105 these potentially related but previously unconsolidated observations, we sought to  
106 determine the relationship between the appearance of T antigen and macrophage invasion  
107 and to use the genetic power of *Drosophila* to find new pathways by which this  
108 glyco-phenotype is regulated.

109

110

## 111 **RESULTS**

112

### 113 **T antigen is enriched and required in invading macrophages in *Drosophila* embryos**

114 To identify glycan structures present on macrophages during invasion we performed a  
115 screen examining FITC-labelled lectins (see Methods for abbreviations). Only two lectins  
116 had higher staining on macrophages than on surrounding tissues (labeled enriched): PNA,  
117 which primarily binds to the core1 T O-glycan, and UEA-I, which recognizes Fuc $\alpha$ 1-  
118 2Gal $\beta$ 1-4GlcNAc (Molin et al., 1986; Natchiar et al., 2007) (**Fig 1D, S1A-B**). Both  
119 glycans are associated with the invasive migration of cancer cells (Agrawal et al., 2017;  
120 Hung et al., 2014). SBA, WGA, GS-II, GS-I, ConA, MPA and BPA bound at similar or  
121 lower levels on macrophages compared to flanking tissues (**Fig 1D, S1C-I**). We saw no  
122 staining with the sialic acid-recognizing lectin LPA, and none with DBA and HPA, that  
123 both recognize  $\alpha$ GalNAc (Piller et al., 1990) (**Fig 1D, S1K-L**). Thus T antigen and a

124 fucosylated structure are upregulated on embryonic macrophages during their invasion.  
125 To confirm T antigen as the source of the macrophage signal, and to characterize its  
126 temporal and spatial enrichment, we used a monoclonal antibody (mAb 3C9) to the T O-  
127 glycan structure (Steentoft et al., 2011). Through Stage 10, macrophages displayed very  
128 little T antigen staining, similar to other tissues (**Fig 1E, F**). However, at late Stage 11  
129 (**Fig S1A**) and early Stage 12, when macrophages start to invade the extended germband,  
130 T antigen staining began to be enriched on macrophages moving towards and into the  
131 germband (**Fig 1E-H**). We knocked down the core1 synthase C1GalTA required for the  
132 final step of T antigen synthesis (**Fig 1A**) (Lin et al., 2008; Müller et al., 2005) using  
133 RNAi expression only in macrophages and observed strongly reduced staining (**Fig 1I**,  
134 **Fig S1M**). We conclude that the antibody staining is the result of T antigen produced by  
135 macrophages themselves. Our results are consistent with findings showing T antigen  
136 expression in a macrophage-like pattern in late Stage 12, and on a subset of macrophages  
137 at Stage 16 (Yoshida et al., 2008). To determine if these T O-glycans on macrophages are  
138 important for facilitating their germband invasion, we knocked down C1GalTA in  
139 macrophages with two independent RNAi lines, and used a P element excision allele,  
140 C1GalTA[2.1] which removes conserved sequence motifs required for activity (Lin et al.,  
141 2008). We visualized macrophages through specific expression of fluorescent markers  
142 and observed a 25 and a 33% decrease in their number in the germband for the RNAis  
143 (**Fig 1J,K**), and a 44% decrease in the C1GalTA[2.1] mutant (**Fig 1L**). When we counted  
144 the number of macrophages sitting on the yolk next to the germband in the strongest  
145 RNAi we observed an increase (**Fig S1N**) that we also observed in the C1GalT mutant  
146 (**Fig S1O**). The sum of the macrophages in the yolk and germband is the same in the  
147 control, RNAi knockdown (control  $136.5 \pm 6.4$ , RNAi  $142.3 \pm 6.6$ ,  $p=0.7$ ) and mutant  
148 (control  $138.5 \pm 4.9$ , mutant,  $142.3 \pm 7.4$ ,  $p=0.87$ ) arguing that macrophages that cannot  
149 enter the germband when C1GalTA levels are reduced remain on the yolk (**Fig S1O**). We  
150 observed no effect on the migration of macrophages on the vnc, a route that does not  
151 require tissue invasion (**Fig S1P**) (Campos-Ortega and Hartenstein, 1997; Evans et al.,  
152 2010). 18% of T antigen in the embryo has been found to be further modified,  
153 predominantly by glucuronic-acid (GlycA) (Aoki et al., 2008). Of the three GlcA

155 transferases found in *Drosophila* only GlcAT-P is robustly capable of adding GlcA onto  
156 the T O-glycan structure in cells (Breloy et al., 2016; Itoh et al., 2018; Kim et al., 2003).  
157 To examine if the specific defect in germband invasion that we observed by blocking the  
158 formation of T antigen is due to the need for a further elaboration by GlcA, we utilized a  
159 lethal MI{MIC} transposon insertion mutant in the GlcAT-P gene. We observed no  
160 change in the numbers of macrophages within the germband in the GlcAT-PMI05251  
161 mutant (**Fig 1M**) and a 20% increase in the number of macrophages on the yolk (**Fig**  
162 **S1P**). Therefore our results strongly suggest that the T antigen we observe being  
163 upregulated in macrophages as they move towards and into the germband is needed for  
164 efficient tissue invasion.

165

### 166 **An atypical MFS member acts in macrophages to increase T antigen levels**

167 We sought to determine which proteins could temporally regulate the increase in the  
168 appearance of T O-glycans in invading macrophages. We first considered proteins  
169 required for synthesizing the core1 structure, namely the T synthase, C1GalTA, and the  
170 UDP-Gal sugar transporter, Ugalt (Aumiller and Jarvis, 2002) (**Fig 1A**). However, q-PCR  
171 analysis of FACS sorted macrophages from Stage 9-10, Stage 12, and Stage 13-17 show  
172 that though both are enriched in macrophages, neither is transcriptionally upregulated  
173 before or during Stage 12 (**Fig 2A,B**). We therefore examined the Bloomington  
174 *Drosophila* Genome Project (BDGP) *in situ* database looking for predicted sugar binding  
175 proteins expressed in macrophages with similar timing to the observed T antigen increase  
176 (Tomancak et al., 2007, 2002). We identified CG8602, a predicted MFS with regions of  
177 homology to known sugar responsive proteins and predicted sugar or neurotransmitter  
178 transporters (**Fig 2C**). BDGP and our *in situ* hybridizations indicate that CG8602 RNA is  
179 maternally deposited, with expression throughout the embryo through Stage 4 after which  
180 its levels decrease (**Fig S2A**). This weak ubiquitous expression is followed by strong  
181 enrichment in macrophages from Stage 10-12 (**Fig 2D**), along with expression in the  
182 amnioserosa at Stage 13 (**Fig S2B**). We confirmed this by q-PCR analysis of FACS  
183 sorted macrophages, which detected seven-fold higher levels of CG8602 RNA in  
184 macrophages than in the rest of the embryo by Stage 9-10 and 12-fold by Stage 12 (**Fig**  
185 **2E**). To determine if CG8602 could affect T antigen levels, we examined a viable P-

186 element insertion mutant in the 5'UTR, *CG8602<sup>EP3102</sup>* (**Fig S2C**). This insertion displays  
187 strongly reduced *CG8602* expression in FACS-sorted macrophages to 15% of wild type  
188 levels, as assessed by q-PCR (**Fig 2F**), and shows strongly diminished expression  
189 throughout the embryo by *in situ* hybridization (**Fig S2D**). We also created an excision  
190 allele,  $\Delta 33$ , removing the 5'UTR flanking the P-element, the start methionine, and 914 bp  
191 of the ORF (**Fig S2C**). This is a lethal allele, and the line carrying it over a balancer is  
192 very weak; exceedingly few embryos are laid and the embryos homozygous for the  
193 mutation do not develop past Stage 12. Therefore, we did not continue experiments with  
194 this allele, and instead utilized the insertion mutant. This *CG8602<sup>EP3102</sup>* P-element mutant  
195 displays decreased T antigen staining on macrophages moving towards and entering the  
196 germband (**Fig 2G**) in Stage 11 through late Stage 12. q-PCR analysis on FACS sorted  
197 macrophages show that the reduction in T antigen levels in the mutant is not caused by  
198 changes in the RNA levels of the T synthase C1GalTA or the UgalT Gal and GalNAc  
199 transporter (Aumiller and Jarvis, 2002; Segawa et al., 2002) (**Fig 2H**). Since O-  
200 glycosylation is initiated in the Golgi, we wanted to examine where *CG8602* is localized.  
201 We first utilized the macrophage-like S2R+ cell line, transfecting a FLAG::HA or  
202 3xmCherry labeled form of *CG8602* under *srpHemo* or a copper inducible MT promoter  
203 control. We detected no colocalization with markers for the nucleus, ER, peroxisomes,  
204 mitochondria or lysosomes (**Fig S2E,J-L**), but did with the Golgi marker Golgin 84 and  
205 the endosome markers Rab7, Rab11 and Hrs (Riedel et al., 2016) (**Fig S2F-I**). We  
206 confirmed this Golgi and endosome colocalization with Golgin 84 and Hrs in late Stage  
207 11 embryos using macrophages extracted from positions in the head adjacent to the  
208 germband (**Fig 2I**). We conclude that the T antigen enrichment on macrophages  
209 migrating towards and into the germband requires a previously uncharacterized atypical  
210 MFS with homology to sugar binding proteins that is localized predominantly to the  
211 Golgi and endosomes.

212

### 213 **The MFS, Minerva, is required in macrophages for dissemination and germband** 214 **invasion**

215 We examined if *CG8602* affects macrophage invasive migration. The *CG8602<sup>EP3102</sup>*  
216 mutant displayed a 35% reduction in macrophages within the germband at early Stage 12



217 compared to the control (**Fig 3A,B,D, Fig S3A**). The same decrease is observed when the  
218 mutant is placed over the deficiency *Df(3L)BSC117* that removes the gene entirely  
219 (**Fig3D**), arguing that *CG8602<sup>EP3102</sup>* is a genetic null for macrophage germband invasion.  
220 The P element transposon insertion itself causes the migration defect because its precise  
221 excision restored the number of macrophages in the germband to wild type levels (**Fig**  
222 **3D**). Expression of the *CG8602* gene in macrophages can rescue the *CG8602<sup>EP3102</sup>* P  
223 element mutant (**Fig 3C,D, Fig S3A**), and RNAi knockdown of *CG8602* in macrophages  
224 can recapitulate the mutant phenotype (**Fig 3I, Fig S3B**). Our data thus argues that  
225 *CG8602* is required in macrophages themselves for germband invasion.

226         Decreased numbers of macrophages in the extended germband could be caused by  
227 specific problems entering this region, or by general migratory defects or a decreased  
228 total number of macrophages. To examine the migratory step that precedes germband  
229 entry, we counted the number of macrophages sitting on the yolk next to the germband in  
230 fixed embryos in the *CG8602<sup>EP3102</sup>* mutant. We observed a 30% decrease compared to the  
231 control (**Fig 3F**), suggesting a defect in early dissemination. Entry into the germband by  
232 macrophages occurs between the closely apposed DE-Cadherin expressing ectoderm and  
233 the mesoderm and is accompanied by deformation of the ectodermal cells (Ratheesh et al.,  
234 2018). We tested if reductions in DE-Cadherin could ameliorate the germband  
235 phenotype. Indeed, combining the *CG8602<sup>EP3102</sup>* mutation with *shg<sup>P34</sup>* which reduces DE-  
236 Cadherin expression (Pacquelet and Røth, 1999; Tepass et al., 1996) produced a partial  
237 rescue (**Fig 3G**), consistent with *CG8602* playing a role in germband entry as well as an  
238 earlier migratory step. Macrophage migration along the *vnc* in late Stage 12 showed no  
239 significant difference in the number of macrophages compared to the control in fixed  
240 embryos (**Fig 3H**) from the *CG8602<sup>EP3102</sup>* mutant or from a knockdown in macrophages  
241 of *CG8602* by RNAi (**Fig S3C**), arguing against a general migratory defect. There was  
242 also no significant difference in the total number of macrophages in either case (**Fig S3D,**  
243 **E**). From analyzing the *CG8602* mutant phenotype in fixed embryos we conclude that  
244 *CG8602* does not affect later *vnc* migration but is important for the early steps of  
245 dissemination and germband invasion.

247         To examine the effect of *CG8602* on macrophage speed and dynamics, we  
performed live imaging of macrophages labeled with the nuclear marker *srpHemo-*



248 *H2A::3xmCherry* in control and *CG8602<sup>EP3102</sup>* mutant embryos (**Video 1 and 2**). We first  
249 imaged macrophages migrating from their initial position in the delaminated mesoderm  
250 up to the germband and detected a 33% decrease in speed ( $2.46 \pm 0.07$   $\mu\text{m}/\text{min}$  in the  
251 control,  $1.66 \pm 0.08$   $\mu\text{m}/\text{min}$  in the *mrva<sup>3102</sup>* mutant,  $p=0.002$ ) (**Fig 3I, J**) and no significant  
252 decrease in persistence ( $0.43 \pm 0.02$  in the control,  $0.40 \pm 0.01$  in the mutant,  $p=0.218$ ) (**Fig**  
253 **S3F**). We then examined the initial migration of macrophages into the germband at late  
254 Stage 11. We observed a range of phenotypes in the six movies we made of the mutant:  
255 in half of them macrophages entered at the normal time, and in the other half we  
256 observed a one to three hour delay in entry. As we observed no change in the timing of  
257 the initiation of germband retraction ( $269.6 \pm 9$  min in control and  $267.1 \pm 3$  min in *mutant*,  
258  $p=-0.75$ ) but did observe a decreased speed of its completion in the mutant ( $107 \pm 12$  min  
259 from start to end of retraction in control and  $133 \pm 6$  min for mutant  $p=0.05$ ), we only  
260 analyzed macrophages within the germband before its retraction begins. We observed a  
261 43% reduction in macrophage speed within the germband ( $2.72 \pm 0.32$   $\mu\text{m}/\text{min}$  in the  
262 control and  $1.55 \pm 0.04$   $\mu\text{m}/\text{min}$  in the mutant,  $p=0.02$ ) (**Fig 3K,L**). To assess this  
263 phenotype's specificity for invasion, we used live imaging of macrophage migration  
264 along the inner vnc that occurs during the same time period as germband entry; we  
265 observed no significant change in speed ( $2.41 \pm 0.06$   $\mu\text{m}/\text{min}$  in the control and  $2.23 \pm 0.01$   
266  $\mu\text{m}/\text{min}$  in the mutant,  $p=0.11$ ) or directionality ( $0.43 \pm 0.03$  in the control and  $0.43 \pm 0.02$   
267 in the mutant,  $p=0.9742$ ) (**Fig 3M, Video 3 and 4**). We conclude from the sum of our  
268 experiments in fixed and live embryos that *CG8602* is important for the initial  
269 disseminatory migration out of the head and for invasive migration into and within the  
270 germband, but does not alter general migration. We name the gene *minerva* (*mrva*), for  
271 the Roman goddess who was initially trapped in the head of her father, Jupiter, after he  
272 swallowed her pregnant mother who had turned herself into a fly.

273

#### 274 **Minerva affects a small fraction of the *Drosophila* embryonic O-glycoproteome**

275 We set out to determine if Minerva induces T glycoforms on particular proteins. We first  
276 conducted a Western Blot with a mAb to T antigen on whole embryo extracts. We used

277 the whole embryo because we were unable to obtain enough protein from FACSed  
278 macrophages or to isolate CRISPR-induced full knockouts of *minerva* in the S2R+  
279 macrophage-like cell line. We observed that several bands detected with the anti-T mAb  
280 were absent or reduced in the *minerva* mutant (**Fig 4A**), indicating an effect on a subset  
281 of proteins. We wished to obtain a more comprehensive view of the proteins affected by  
282 Minerva. Since there is little information about *Drosophila* O-glycoproteins and O-  
283 glycosites (Schwientek *et al.*, 2007; Aoki and Tiemeyer, 2010), we used lectin-enriched  
284 O-glycoproteomics to identify proteins displaying T and Tn glycoforms in Stage 11/12  
285 embryos from wild type and *mrva*<sup>3102</sup> mutants (**Fig S4A**). We labeled tryptic digests of  
286 embryonic protein extracts from control or mutant embryos with stable dimethyl groups  
287 carrying medium (C<sub>2</sub>H<sub>2</sub>D<sub>4</sub>) or light (C<sub>2</sub>H<sub>6</sub>) isotopes respectively to allow each genotype to  
288 be identified in mixed samples (Boersema *et al.*, 2009; Schjoldager *et al.*, 2012, 2015).  
289 The pooled extracts were passed over a Jacalin column to enrich for T and Tn O-  
290 glycopeptides; the eluate was analyzed by mass spectrometry to identify and quantify T  
291 and Tn modified glycopeptides in the wild type and the mutant sample through a  
292 comparison of the ratio of the light and medium isotope labeling channels for each  
293 glycopeptide. In the wild type we identified T and Tn glycopeptides at 936 glycosites  
294 derived from 270 proteins (**Table S1** and **Fig 4B**). 62% of the identified O-glycoproteins  
295 and 77% of identified glycosites contained only Tn O-glycans. 33% of the identified O-  
296 glycoproteins and 23% of glycosites displayed a mixture of T or Tn O-glycans, and 5%  
297 of identified O-glycoproteins and 4% of glycosites had solely T O-glycans (**Fig 4C**). In  
298 agreement with previous studies (Steentoft *et al.*, 2013), only one glycosite was found in  
299 most of the identified O-glycoproteins (44%) (**Fig 4D**). In 20% we found two sites, and  
300 some glycoproteins had up to 27 glycosites. The identified O-glycosites were mainly on  
301 threonine residues, (78.5%) with some on serines (21.2%) and very few on tyrosines  
302 (0.3%) (**Fig S4B**). Metabolism, cuticle development, and receptors were the most  
303 common functional assignments for the glycoproteins (**Fig S4C**). To assess the changes  
304 in glycosylation in the *mrva* mutant we utilized two cutoffs, a three-fold and a more  
305 stringent ten-fold cutoff. The majority of the quantifiable Tn and T O-glycoproteome was  
306 unaltered between the wild type and the *mrva*<sup>3102</sup> mutant, with only 63 proteins (23%)  
showing more than a three-fold change and 18 (6%) a ten-fold shift (**Fig 4F**). We

308 observed both increases and decreases in the levels of T and Tn modification on proteins  
309 in the mutant (**Fig 4F,G, Table S2**), but a greater number of proteins showed decreased  
310 than increased T antigen levels. 67% of the vertebrate orthologs of *Drosophila* proteins  
311 displaying shifts in this O-glycosylation have previously been linked to cancer (**Fig 4H,**  
312 **Table S2**). These proteins were affected at specific sites, with 40% of glycosites on these  
313 proteins changed more than three fold and only 14% more than ten fold. The glycosite  
314 shifts in T antigen occurred either without significant alterations in Tn (33% of glycosites  
315 had only decreased T antigen, 17% of glycosites had only increased T antigen) or with  
316 changes in T antigen occurring in the same direction as the changes in Tn (22% of  
317 glycosites both Tn and T antigen increased, 22% of glycosites both Tn and T decreased)  
318 (**Table S2**). Only 1% of glycosites displayed decreased T antigen with a significant  
319 increase in Tn. Interestingly, a higher proportion of the glycoproteins with altered O-  
320 glycosylation in the *mrva*<sup>3102</sup> mutant had multiple glycosites than the general  
321 glycoproteome (**Fig 4D**) (P value=0.005 for ten-fold changes). We conclude that Minerva  
322 affects O-glycosylation occupancy on a small subset of O-glycoproteins, many of whose  
323 vertebrate orthologs have been linked to cancer, with both T and Tn O-glycopeptides  
324 being affected.

325

### 326 **Minerva raises T antigen levels on proteins required for invasion**

327 Given that the knockdown of the C1GalTA enzyme which blocks Tn to T conversion  
328 produced a germband invasion defect, we examined the known functions of the 18  
329 proteins with lower T antigen in the absence of Minerva to distinguish which processes  
330 Minerva could influence to facilitate invasion (**Fig 4H**). We excluded two proteins  
331 involved in eggshell and cuticle production. To spot proteins whose reduced T antigen-  
332 containing glycopeptides are caused directly by alterations in glycosylation rather than  
333 indirectly by decreased protein expression in the *mrva* mutant, we checked if  
334 glycosylation at other identified glycosites was unchanged or increased. We identified ten  
335 such proteins, several of which were in pathways that had been previously linked to  
336 invasion in vertebrates. Qsox1, a predicted sulfhydryl oxidase required for the secretion,  
337 and thus potential folding of EGF repeats (Tien et al., 2008) showed the strongest  
338 alterations of any protein, with a 50-fold decrease in T antigen levels in the *mrva* mutant.

339 The mammalian ortholog has been shown to affect disulfide bond formation, is  
340 overexpressed in some cancers, promotes Matrigel invasion, and can serve as a negative  
  
342 prognostic indicator in human cancer patients (Chakravarthi et al., 2007; Katchman et al.,  
343 2011; Lake and Faigel, 2014). Dtg, with a 13-fold reduction in T antigen (Hodar et al.,  
344 2014), and Put with a five-fold reduction (Letsou et al., 1995) respond to signaling by the  
345 BMP-like ligand, Dpp. Gp150 shows a four fold decrease in T antigen and modulates  
346 Notch signaling (Fetchko et al., 2002; Li, 2003). Notch and BMP promote invasion and  
347 metastasis in mice (Bach et al., 2018; Garcia and Kandel, 2012; Owens et al., 2015;  
348 Pickup et al., 2015; Sahlgren et al., 2008; Sonoshita et al., 2011). Dpp signaling directs  
349 histoblast invasion in the fly (Ninov et al., 2010). To test if Qsox1, the protein with the  
350 strongest changes in T antigen in the *minerva* mutant is required for germband invasion,  
351 we examined RNAi knockdown of Qsox1 in macrophages and a P element mutant in the  
352 5'UTR of the Qsox1 gene. In both cases we observed reduced numbers of macrophages  
353 in the germband (**Fig 4I,J**) (30% for RNAi and 42% for mutant) and a concomitant  
354 increase of macrophages on the neighboring yolk (**Fig S4D,E**). There was no change in  
355 total cell number in RNAi knockdown embryos (**Fig S4F**). For technical reasons we did  
356 not examine this in the P element mutant line which only grew robustly when combined  
357 with a cytoplasmic macrophage marker. We conclude that Mrva is required to increase T  
358 O-glycans on a subset of the glycosites of selected glycoproteins involved in protein  
359 folding, glycosylation and signaling in pathways frequently linked to promoting cancer  
360 metastasis. Its strongest effect is on a predicted sulfhydryl oxidase which is required in  
361 macrophages for their germband invasion, the *Drosophila* ortholog of the mammalian  
362 cancer protein, QSOX1.

363

#### 364 **Conservation of Minerva's function in macrophage invasion and T antigen** 365 **modification by its mammalian ortholog MFSD1**

366 To determine if our studies could ultimately be relevant for mammalian biology and  
367 therefore also cancer research, we searched for a mammalian ortholog. MFSD1 from *mus*  
368 *musculus*, shows strong sequence similarity with Mrva, with 50% of amino acids  
369 displaying identity and 68% conservation (**Fig 5A, Fig S5A**). A transfected C-terminally

370 GFP-tagged form (**Fig S5B**) showed localization to the secretory pathway, colocalizing  
371 with the Golgi marker GRASP65 in murine MC-38 colon carcinoma cells (**Fig 5B, Fig**  
372 **S5C-D**). mmMFSD1 expression in macrophages in *mrva*<sup>3102</sup> mutant embryos can  
373 completely rescue the germband invasion defect (**Fig 5C,D**). This macrophage-specific  
374 expression of MFSD1 also resulted in higher levels of T antigen on macrophages when  
375 compared to those in *mrva*<sup>3102</sup> mutants (**Fig 5E,F**). Thus MFSD1 displays localization in  
376 the Golgi in mammalian cancer cells and can rescue O-glycosylation and migration  
377 defects when expressed in *Drosophila*, arguing that the functions Mrva carries out to  
378 promote invasion into the germband are conserved up to mammals.

379

### 380 **Discussion:**

381

382 O-glycosylation is one of the most common posttranslational modifications, yet the  
383 intrinsic technical challenges involved in identifying O-glycosites and altered O-  
384 glycosylation on a proteome-wide level has hampered the discovery of biological  
385 functions (Levery et al., 2015). Here we provide two important new advances for the  
386 field: (i) defining the GalNAc-type O-glycoproteome of *Drosophila* embryos and (ii)  
387 identifying a key regulator of this O-glycosylation, Minerva, with an unexpected role for  
388 a member of the major facilitator superfamily. As O-glycosites cannot as yet be reliably  
389 predicted, our proteomic characterization in a highly genetically accessible organism will  
390 permit future studies on how glycosylation affects cell behavior; we highlight T and Tn  
391 O-glycosylated receptors in **Table 1** to further this goal. Our demonstration that a  
392 conserved protein affects invasion and the appearance of the cancer-associated core1 T  
393 glycoform on a set of proteins connected to invasion may have implications for cancer.

394

### 395 **Modifications of the O-glycoproteome by an MFS family member**

396 Our identification of a MFS family member as a regulator of O-glycosylation is  
397 surprising. MFS family members can serve as transporters and shuttle a wide variety of  
398 substrates (Quistgaard et al., 2016; Reddy et al., 2012). Minerva is localized to the Golgi  
399 and displays homology to sugar transporters; Minerva could thus affect O-glycosylation  
400 through substrate availability. However, the lower and higher levels of glycosylation in

401 the *mrva*<sup>3102</sup> mutant we observe are hard to reconcile with this hypothesis. Given that the  
402 changes in T antigen on individual glycosites in the *mrva* mutant are found either with no  
403 significant change in Tn or with a change in the same direction (**Table S2**), regulation  
404 appears to occur at the initial GalNAc addition on the protein subset as well as on further  
405 T antigen elaboration. 95% of the proteins with 10-fold altered glycosylation in the *mrva*  
406 mutant had multiple O-glycosylation sugar modifications compared to 56% of the general  
407 O-glycoproteome. Greatly enhanced glycosylation of protein sequences containing an  
408 existing glycan modification is observed for some GalNAc-Ts due to a lectin  
409 domain (Hassan et al., 2000; Kubota et al., 2006; Revoredo et al., 2016) and Minerva  
410 could affect such a GalNAc-T in *Drosophila*. Alternatively, Minerva, while in the  
411 “outward open” conformation identified for MFS structures (Quistgaard et al., 2016),  
412 may itself have a lectin-like interaction with Tn and T glycoforms that have already been  
413 added on a loop of particular proteins. Minerva’s binding could open up the target  
414 protein’s conformation to increase or block access to other potential glycosites and thus  
415 affect the final glycosylation state on select glycoproteins.

416 The changes we see in O-glycosylation are also likely due to a combination of  
417 Minerva’s direct and indirect effects. O-GalNAc modification of vertebrate Notch can  
418 affect Notch signaling during development (Boskovski et al., 2015); the *Drosophila*  
419 ortholog of the responsible GalNAc transferase is also essential for embryogenesis  
420 (Bennett et al., 2010; Schwientek et al., 2002). Thus the changed glycosylation we  
421 observe on components of the Notch and Dpp pathways could alter transcription  
422 (Hamaratoglu et al., 2014; Ntziachristos et al., 2014), shifting protein levels and thereby  
423 changing the ratio of some glycopeptides in the *mrva* mutant relative to the wild type.  
424 Proteins in which glycosylation at other sites is unchanged or changed in the opposite  
425 direction are those most likely to be directly affected by Minerva. Such proteins include  
426 ones involved in protein folding and O-glycan addition and removal (**Fig 4I**) (Tien et al.,  
427 2008). If changes in the glycosylation of these proteins alters their specificity or activity,  
428 some of the shifts we observe in our glycoproteomic analysis could be indirect in a  
429 different way; an initial effect of Minerva on the glycosylation of regulators of protein  
430 folding and glycosylation could change how these primary Minerva targets affect the  
431 glycosylation of a second wave of proteins.



### 432 **An invasion program regulated by Minerva**

433 The truncated immature core1 T and Tn O-glycans are not usually present in normal  
434 human tissues but exposure of these uncapped glycans has been found on the majority of  
435 cancers and serves as a negative indicator of patient outcome (Fu et al., 2016; Springer,  
436 1984). An antibody against T antigen has decreased the metastatic spread of cancer cells  
437 in mice (Heimburg et al., 2006). Here we further strengthen the case for a causative  
438 relationship between this glycosylation modification and the invasive migration that  
439 underlies metastasis. The transient appearance of T antigen in human fetuses (Barr et al.,  
440 1989) and the conserved function of Minerva lead us to propose that the change in O-  
441 glycosylation in cancer represents the reactivation of an ancient developmental program  
442 for invasion. Our embryonic glycoproteome analysis identifies 106 T antigen modified  
443 proteins, a very large set to investigate. However, the absence of *Mrva* causes invasion  
444 defects and deficits in T antigen modification on only 10-20 proteins; these include  
445 components involved in protein folding, glycosylation modification, and the signaling  
446 pathways triggered by Notch and the BMP family member, Dpp. Our working model is  
447 that the defect in germband tissue invasion seen in the *mrva* mutant is caused by the  
448 absence of T antigen on this group of proteins that act coordinately (**Fig 5G**). 56% of  
449 these have vertebrate orthologs, and 55% of those have already been linked to cancer and  
450 metastasis. For example, the vertebrate ortholog of *Qsox1*, the protein with the largest  
451 changes in T antigen in the *mrva* mutant which is itself required for germband invasion,  
452 enhances cancer cell invasion in *in vitro* assays and higher levels of the protein predict  
453 poor patient outcomes (Katchman et al., 2013, 2011). Minerva's vertebrate ortholog,  
454 MFSD1, can rescue macrophage migration defects and restores higher T antigen levels.  
455 Tagged versions of Minerva's vertebrate ortholog, MFSD1, detected the protein in  
456 lysosomes in HeLa and rat liver cells (Chapel et al., 2013; Palmieri et al., 2011).  
457 However in cancer cells, we find MFSD1 in the Golgi, where O-glycosylation is known  
458 to occur (Bennett et al., 2012). As kinases add phospho-groups to affect a set of proteins  
459 and orchestrate a particular cellular response, we propose that Minerva in *Drosophila*  
460 macrophages and its vertebrate ortholog MFSD1 in cancer trigger changes in O-  
461 glycosylation that coordinately modulate, activate and inhibit a protein group to facilitate  
462 cellular dissemination and tissue invasion.

463

## ACKNOWLEDGEMENTS

464 We thank the following for their contributions: Dr. McNew and the *Drosophila*  
465 Genomics Resource Center supported by NIH grant 2P40OD010949-10A1 for plasmids,  
466 F. Mauri, J. Knöblich, and L. Borsig for cell lines, K. Bruckner, M. Sixt and the Sixt lab  
467 for helpful advice, K.B., P. Duchek, K. VijayRaghavan and the Bloomington *Drosophila*  
468 Stock Center supported by NIH grant P40OD018537 and the Vienna *Drosophila*  
469 Resource Center for fly stocks. E. Ogris for an antibody gift, L. Cooley and S. Munro for  
470 contributing the antibodies produced by the Developmental Studies Hybridoma Bank,  
471 which was created by the Eunice Kennedy Shriver National Institute of Child Health and  
472 Human Development of the NIH, and is maintained at the University of Iowa. We thank  
473 the Life Scientific Service Units at IST Austria for technical support and assistance with  
474 microscopy and FACS analysis, and J. Friml, C. Guet, P. Rangan, and T. Hurd for  
475 comments on the manuscript. K.V. was supported by a DOC fellowship from the  
476 Austrian Academy of Sciences. A.G. and A.R. were supported by the Austrian Science  
477 Fund (FWF) grant DASI\_FWF01\_P29638S, D.E.S. by Marie Curie CIG 334077/IRTIM,  
478 and A.R. also by Marie Curie *IIF* GA-2012-32950 BB: DICJI. M.R. was supported by  
479 the NO Forschungs und Bildungsges.m.b.H. M.M. received funding from the European  
480 Union's Horizon 2020 research and Innovation programme under the Marie Skłodowska-  
481 Curie Grant Agreement No. 665385. We are deeply grateful to R. Lehmann in whose lab  
482 the work underlying this project began.

483

484 Author contributions: J.B., K.V., M.R., D.E.S., S.E, S.W., H.C., K.S. designed  
485 experiments, J.B., M.M., K.V., M.R., I.L., J.S., S.W., S.E., A.G., K.S. carried out  
486 experiments, J.B., K.V., M.R., A.R., D.E.S., S.E., H.C., S.W., M.M., K.S. analyzed data,  
487 K.V., A.G. and D.E.S. made figures and wrote the manuscript. All authors read and  
488 approved the final manuscript.

489

490 Declaration of interest

491 The authors state that they have no competing interests.

492

493 Table 1: **Receptors identified by the O-glycoproteome as T or Tn antigen modified**

| Receptor | Function                                                                                  | Glycosylation                        | Changes in <i>mrva</i> <sup>3102</sup> |
|----------|-------------------------------------------------------------------------------------------|--------------------------------------|----------------------------------------|
| Babo     | Activating signaling                                                                      | 2 glyco sites, T antigen only        | no                                     |
| Boi      | Regulation of hh-dependent processes                                                      | 3 glyco sites, Tn antigen only       | no                                     |
| CG12121  | Unknown                                                                                   | 3 glyco sites, Tn antigen only       | no                                     |
| CG15765  | Carbohydrate binding, nervous system development                                          | 1 glycosite, T antigen               | no                                     |
| CG5888   | Unknown                                                                                   | 1 glyco site, T or Tn antigen        | no                                     |
| CG9095   | Carbohydrate binding                                                                      | 1 glyco site, Tn antigen             | no                                     |
| Cirl     | Calcium independent receptor for $\alpha$ -latrotoxin, adult locomotory behavior          | 1 glyco site, T or Tn antigen        | no                                     |
| Crb      | epithelial morphogenesis, apico-basal cell polarity, negative regulator of Notch activity | 1 glyco site, Tn antigen             | no                                     |
| Dg       | non-integrin ECM receptor, connects ECM to the actin cytoskeleton                         | 1 glycosite, T or Tn antigen         | no                                     |
| Drl      | axon guidance through Wnt5                                                                | 1 glyco site, T or Tn antigen        | no                                     |
| Hbs      | Muscle cell fusion                                                                        | 2 glycosites, T and Tn antigen       | no                                     |
| Hmu      | Hydrolase activity                                                                        | 15 glycosites, both T and Tn antigen | Tn inc.                                |
| LpR1     | Regulation of immune responses                                                            | 2 glycosites, Tn antigen             | Tn inc.                                |
| LpR2     | Cellular uptake of neutral lipids                                                         | 3 sites, T and Tn antigen            | T & Tn inc.                            |
| LRP1     | LDL receptor, works with megalin                                                          | 4 glycosites, T and Tn antigen       | no                                     |
| Mgl      | Lipid regulation                                                                          | 2 glycosites, Tn antigen             | Tn dec.                                |
| Mth15    | GPCR, heart morphogenesis                                                                 | 1 glyco site, T or Tn antigen        | no                                     |
| NimB2    | Defense response to bacterium                                                             | 1 glycosite, Tn antigen              | no                                     |
| NimC4    | Recognition and engulfment of apoptotic cells during development                          | 1 glycosite, T or Tn antigen         | no                                     |
| Nrx-IV   | Septate junction formation, glial                                                         | 1 glyco site, Tn antigen             | no                                     |

|         |                                                                                      |                                 |            |
|---------|--------------------------------------------------------------------------------------|---------------------------------|------------|
|         | neural interaction                                                                   |                                 |            |
| PlexB   | Axon guidance                                                                        | 1 glyco site, Tn antigen        | no         |
| Put     | Dpp signaling                                                                        | 5 glyco sites, T and Tn antigen | T&Tn dec.  |
| Sas     | Pathfinding, glial neuron interaction                                                |                                 | T dec.     |
| Sdc     | Robo neural pathfinding, synapse at neuromuscular junction                           | 1 glyco site, Tn antigen        | no         |
| Sema-1b | Neural pathfinding                                                                   | 1 glyco site, Tn antigen        | no         |
| Sli     | Neural pathfinding, robo interaction                                                 | 2 glyco sites, T and Tn antigen | T&Tn inc.  |
| Sr-CII  | Scavenger receptor, immune response                                                  | 6 glyco sites, T and Tn antigen | no         |
| Syb     | Synaptic vesicle, SNAP receptor activity                                             | 1 glyco site, T or Tn antigen   | no         |
| Tequila | Scavenger receptor, serine protease, glucose homeostasis, long and short term memory | 5 glycosite, Tn antigen         | no         |
| Unc-5   | Neural pathfinding, netrin receptor                                                  | 1 glycosite, Tn antigen         | no         |
| Verm    | Cuticle development and tracheal tube size control                                   | 1 glycosite, T or Tn antigen    | T &Tn inc. |

494

495

## References

- 496 Aebi M. 2013. N-linked protein glycosylation in the ER. *Biochim Biophys Acta - Mol*  
497 *Cell Res* **1833**:2430–2437. doi:10.1016/j.bbamcr.2013.04.001
- 498 Agrawal P, Fontanals-Cirera B, Sokolova E, Jacob S, Vaiana CA, Argibay D, Davalos V,  
499 McDermott M, Nayak S, Darvishian F, Castillo M, Ueberheide B, Osman I, Fenyő  
500 D, Mahal LK, Hernando E. 2017. A Systems Biology Approach Identifies FUT8 as  
501 a Driver of Melanoma Metastasis. *Cancer Cell* **31**:804–819.e7.  
502 doi:10.1016/j.ccell.2017.05.007
- 503 Aoki K, Porterfield M, Lee SS, Dong B, Nguyen K, McGlamry KH, Tiemeyer M. 2008.  
504 The diversity of O-linked glycans expressed during *Drosophila melanogaster*  
505 development reflects stage- and tissue-specific requirements for cell signaling. *J*  
506 *Biol Chem* **283**:30385–30400. doi:10.1074/jbc.M804925200
- 507 Aoki K, Tiemeyer M. 2010. The glycomics of glycan glucuronylation in *drosophila*  
508 *melanogaster*, 1st ed, *Methods in Enzymology*. Elsevier Inc. doi:10.1016/S0076-  
509 6879(10)80014-X
- 510 Aumiller JJ, Jarvis DL. 2002. Expression and functional characterization of a nucleotide  
511 sugar transporter from *Drosophila melanogaster*: relevance to protein glycosylation  
512 in insect cell expression systems. *Protein Expr Purif* **26**:438–48.
- 513 Bach D-H, Park HJ, Lee SK. 2018. The Dual Role of Bone Morphogenetic Proteins in  
514 Cancer. *Mol Ther oncolytics* **8**:1–13. doi:10.1016/j.omto.2017.10.002
- 515 Baldus SE, Zirbes TK, Hanisch F, Ph D, Kunze D, Shafizadeh ST, Nolden S, Mo SP,  
516 Karsten U, Ph D, Thiele J, Ho AH. 2000. Thomsen-Friedenreich Antigen Presents as  
517 a Prognostic Factor in Colorectal Carcinoma A Clinicopathologic Study of 264  
518 Patients. *Cancer* **88**:1536–1543.
- 519 Barr N, Taylor CR, Young T, Springer GF. 1989. Are pancarcinoma T and Tn  
520 differentiation antigens? *Cancer* **64**:834–41.
- 521 Bennett EP, Chen YW, Schwientek T, Mandel U, Schjoldager KT, Cohen SM,  
522 Clausen H. 2010. Rescue of *Drosophila melanogaster* l(2)35Aa lethality is only  
523 mediated by polypeptide GalNAc-transferase pgant35A, but not by the evolutionary  
524 conserved human ortholog GalNAc-transferase-T11. *Glycoconj J* **27**:435–444.  
525 doi:10.1007/s10719-010-9290-5

- 526 Bennett EP, Mandel U, Clausen H, Gerken TA, Fritz TA, Tabak LA. 2012. Control of  
527 mucin-type O-glycosylation: a classification of the polypeptide GalNAc-transferase  
528 gene family. *Glycobiology* **22**:736–56. doi:10.1093/glycob/cwr182
- 529 Bian B, Mongrain S, Cagnol S, Langlois M-J, Boulanger J, Bernatchez G, Carrier JC,  
530 Boudreau F, Rivard N. 2016. Cathepsin B promotes colorectal tumorigenesis, cell  
531 invasion, and metastasis. *Mol Carcinog* **55**:671–87. doi:10.1002/mc.22312
- 532 Boersema PJ, Raijmakers R, Lemeer S, Mohammed S, Heck AJR. 2009. Multiplex  
533 peptide stable isotope dimethyl labeling for quantitative proteomics. *Nat Protoc*  
534 **4**:484–494. doi:10.1038/nprot.2009.21
- 535 Boland CR, Montgomery CK, Kim YS. 1982. Alterations in human colonic mucin  
536 occurring with cellular differentiation and malignant transformation. *Proc Natl Acad*  
537 *Sci U S A* **79**:2051–5.
- 538 Boskovski MT, Yuan S, Borbye Pedersen N, Knak Goth C, Makova S, Clausen H,  
539 Brueckner M, Khokha MF. 2015. The heterotaxy gene, GALNT11, glycosylates  
540 Notch to orchestrate cilia type and laterality. *Anal Chem* **25**:368–379.  
541 doi:10.1016/j.cogdev.2010.08.003.Personal
- 542 Breloy I, Schwientek T, Althoff D, Holz M, Koppen T, Krupa A, Hanisch F-G. 2016.  
543 Functional Analysis of the Glucuronyltransferases GlcAT-P and GlcAT-S of  
544 *Drosophila melanogaster*: Distinct Activities towards the O-linked T-antigen.  
545 *Biomolecules* **6**:8. doi:10.3390/biom6010008
- 546 Bruckner K, Kockel L, Duchek P, Luque CM, Rørth P, Perrimon N. 2004. The PDGF /  
547 VEGF Receptor Controls Blood Cell Survival in *Drosophila* 77 Avenue Louis  
548 Pasteur **7**:73–84.
- 549 Campos-Ortega JA, Hartenstein V. 1997. The Embryonic Development of *Drosophila*  
550 *melanogaster*. Berlin, Heidelberg: Springer Berlin Heidelberg. doi:10.1007/978-3-  
551 662-22489-2
- 552 Cao B, Yang L, Rong W, Feng L, Han N, Zhang K, Cheng S, Wu J, Xiao T, Gao Y.  
553 2015. Latent transforming growth factor-beta binding protein-1 in circulating plasma  
554 as a novel biomarker for early detection of hepatocellular carcinoma. *Int J Clin Exp*  
555 *Pathol* **8**:16046–54.
- 556 Cao Y, Stosiek P, Springer GF, Karsten U. 1996. Thomsen-Friedenreich-related



- 557 carbohydrate antigens in normal adult human tissues: a systematic and comparative  
558 study. *Histochem Cell Biol* **106**:197–207.
- 559 Carrasco C, Gilhooly NS, Dillingham MS, Moreno-Herrero F. 2013. On the mechanism  
560 of recombination hotspot scanning during double-stranded DNA break resection.  
561 *Proc Natl Acad Sci U S A* **110**:E2562-71. doi:10.1073/pnas.1303035110
- 562 Cawthorn TR, Moreno JC, Dharsee M, Tran-Thanh D, Ackloo S, Zhu PH, Sardana G,  
563 Chen J, Kupchak P, Jacks LM, Miller NA, Youngson BJ, Iakovlev V, Guidos CJ,  
564 Vallis KA, Evans KR, McCready D, Leong WL, Done SJ. 2012. Proteomic analyses  
565 reveal high expression of decorin and endoplasmic reticulum chaperones (HSP90B1) are associated with  
566 breast cancer metastasis and decreased survival. *PLoS One* **7**:e30992.  
567 doi:10.1371/journal.pone.0030992
- 568 Chakravarthi S, Jessop CE, Willer M, Stirling CJ, Bulleid NJ. 2007. Intracellular  
569 catalysis of disulfide bond formation by the human sulfhydryl oxidase, QSOX1.  
570 *Biochem J* **404**:403–411. doi:10.1042/BJ20061510
- 571 Chapel A, Kieffer-Jaquinod S, Sagné C, Verdon Q, Ivaldi C, Mellal M, Thirion J, Jadot  
572 M, Bruley C, Garin J, Gasnier B, Journet A. 2013. An Extended Proteome Map of  
573 the Lysosomal Membrane Reveals Novel Potential Transporters. *Mol Cell*  
574 *Proteomics* **12**:1572–1588. doi:10.1074/mcp.M112.021980
- 575 Chia J, Goh G, Bard F. 2016. Short O-GalNAc glycans: regulation and role in tumor  
576 development and clinical perspectives. *Biochim Biophys Acta - Gen Subj*  
577 **1860**:1623–1639. doi:10.1016/J.BBAGEN.2016.03.008
- 578 Chiu C-C, Lin C-Y, Lee L-Y, Chen Y-J, Lu Y-C, Wang H-M, Liao C-T, Chang JT-C,  
579 Cheng A-J. 2011. Molecular chaperones as a common set of proteins that regulate  
580 the invasion phenotype of head and neck cancer. *Clin Cancer Res* **17**:4629–41.  
581 doi:10.1158/1078-0432.CCR-10-2107
- 582 Chiu C, Lin C, Lee L, Chen Y, Lu Y, Wang H. 2011. Molecular Chaperones as a  
583 Common Set of Proteins That Regulate the Invasion Phenotype of Head and Neck  
584 Cancer. *Clin Cancer Res* **17**:1–14. doi:10.1158/1078-0432.CCR-10-2107
- 585 Christlet HT, Veluraja K. 2001. Database Analysis of O-Glycosylation Sites in Proteins.  
586 *Biophys J* **80**:952–960. doi:10.1016/S0006-3495(01)76074-2
- 587 Cofre J, Abdelhay E. 2017. Cancer Is to Embryology as Mutation Is to Genetics□:

- 588 Hypothesis of the Cancer as Embryological Phenomenon **2017**.  
589 doi:10.1155/2017/3578090
- 590 Comer FI, Hart GW. 2000. O-glycosylation of nuclear and cytosolic proteins. Dynamic  
591 interplay between O-GlcNAc and O-phosphate. *J Biol Chem* **275**:29179–29182.  
592 doi:10.1074/jbc.R000010200
- 593 Dalziel M, Whitehouse C, Mcfarlane I, Brockhausen I, Gschmeissner S, Schwientek T,  
594 Clausen H, Burchell JM, Taylor-papadimitriou J. 2001. The Relative Activities of  
595 the C2GnT1 and ST3Gal-I Glycosyltransferases Determine O -Glycan Structure and  
596 Expression of a Tumor-associated Epitope on MUC1 \* **276**:11007–11015.  
597 doi:10.1074/jbc.M006523200
- 598 Evans IR, Hu N, Skaer H, Wood W. 2010. Interdependence of macrophage migration and  
599 ventral nerve cord development in Drosophila embryos. *Development* **137**:1625–  
600 1633. doi:10.1242/dev.046797
- 601 Fan X, Wang C, Song X, Liu H, Li X, Zhang Y. 2018. Elevated Cathepsin K potentiates  
602 metastasis of epithelial ovarian cancer. *Histol Histopathol* **33**:673–680.  
603 doi:10.14670/HH-11-960
- 604 Ferguson K, Yadav A, Morey S, Abdullah J, Hrysenko G, Eng JY, Sajjad M, Koury S.  
605 2014. Preclinical studies with JAA - F11 anti - Thomsen-Friedenreich monoclonal  
606 antibody for human breast cancer **10**:385–399.
- 607 Fetchko M, Huang W, Li Y, Lai ZC. 2002. Drosophila Gp150 is required for early  
608 ommatidial development through modulation of Notch signaling. *EMBO J* **21**:1074–  
609 1083. doi:10.1093/emboj/21.5.1074
- 610 Fu C, Zhao H, Wang Y, Cai H, Xiao Y, Zeng Y, Chen H. 2016. Tumor-associated  
611 antigens: Tn antigen, sTn antigen, and T antigen. *Hla* **88**:275–286.  
612 doi:10.1111/tan.12900
- 613 Fuwa TJ, Kinoshita T, Nishida H, Nishihara S. 2015. Reduction of T antigen causes loss  
614 of hematopoietic progenitors in Drosophila through the inhibition of filopodial  
615 extensions from the hematopoietic niche. *Dev Biol* **401**:206–219.  
616 doi:10.1016/j.ydbio.2015.03.003
- 617 Garcia A, Kandel JJ. 2012. Notch: a key regulator of tumor angiogenesis and metastasis.  
618 *Histol Histopathol* **27**:151–6. doi:10.14670/HH-27.151

- 619 Gohrig A, Detjen KM, Hilfenhaus G, Korner JL, Welzel M, Arsenic R, Schmuck R,  
620 Bahra M, Wu JY, Wiedenmann B, Fischer C. 2014. Axon Guidance Factor SLIT2  
621 Inhibits Neural Invasion and Metastasis in Pancreatic Cancer. *Cancer Res* **74**:1529–  
622 1540. doi:10.1158/0008-5472.CAN-13-1012
- 623 Gonias SL, Karimi-Mostowfi N, Murray SS, Mantuano E, Gilder AS. 2017. Expression  
624 of LDL receptor-related proteins (LRPs) in common solid malignancies correlates  
625 with patient survival. *PLoS One* **12**:e0186649. doi:10.1371/journal.pone.0186649
- 626 Goth CK, Vakhrushev SY, Joshi HJ, Clausen H, Schjoldager KT. 2018. Fine-Tuning  
627 Limited Proteolysis: A Major Role for Regulated Site-Specific O-Glycosylation.  
628 *Trends Biochem Sci* **43**:269–284. doi:10.1016/j.tibs.2018.02.005
- 629 Guruharsha KG, Rual JF, Zhai B, Mintseris J, Vaidya P, Vaidya N, Beekman C, Wong C,  
630 Rhee DY, Cenaj O, McKillip E, Shah S, Stapleton M, Wan KH, Yu C, Parsa B,  
631 Carlson JW, Chen X, Kapadia B, Vijayraghavan K, Gygi SP, Celniker SE, Obar RA,  
632 Artavanis-Tsakonas S. 2011. A protein complex network of *Drosophila*  
633 *melanogaster*. *Cell* **147**:690–703. doi:10.1016/j.cell.2011.08.047
- 634 Gyoergy A, Roblek M, Ratheesh A, Valoskova K, Belyaeva V, Wachner S,  
635 Matsubayashi Y, Sánchez-Sánchez BJ, Stramer B, Siekhaus DE. 2018. Tools  
636 Allowing Independent Visualization and Genetic Manipulation of *Drosophila*  
637 *melanogaster* Macrophages and Surrounding Tissues. *G3 (Bethesda)* **8**:845–857.  
638 doi:10.1534/g3.117.300452
- 639 Hamaratoglu F, Affolter M, Pyrowolakis G. 2014. Dpp/BMP signaling in flies: From  
640 molecules to biology. *Semin Cell Dev Biol* **32**:128–136.  
641 doi:10.1016/j.semcdb.2014.04.036
- 642 Hart GW, Slawson C, Ramirez-Correa G, Lagerlof O. 2011. Cross talk between O-  
643 GlcNAcylation and phosphorylation: roles in signaling, transcription, and chronic  
644 disease. *Annu Rev Biochem* **80**:825–58. doi:10.1146/annurev-biochem-060608-  
645 102511
- 646 Hassan H, Reis CA, Bennett EP, Mirgorodskaya E, Roepstorff P, Hollingsworth MA,  
647 Burchell J, Taylor-Papadimitriou J, Clausen H. 2000. The lectin domain of UDP-N-  
648 acetyl-D-galactosamine: polypeptide N-acetylgalactosaminyltransferase-T4 directs  
649 its glycopeptide specificities. *J Biol Chem* **275**:38197–205.

- 650       doi:10.1074/jbc.M005783200
- 651 Häuselmann I, Borsig L. 2014. Altered tumor-cell glycosylation promotes metastasis.  
652       *Front Oncol* **4**:1–15. doi:10.3389/fonc.2014.00028
- 653 Heimbürg J, Yan J, Morey S, Glinskii O V., Huxley VH, Wild L, Klick R, Roy R,  
654       Glinsky V V., Rittenhouse-Olson K. 2006. Inhibition of Spontaneous Breast Cancer  
655       Metastasis by Anti—Thomsen-Friedenreich Antigen Monoclonal Antibody JAA-  
656       F11. *Neoplasia* **8**:939–948. doi:10.1593/neo.06493
- 657 Hodar C, Zuñiga A, Pulgar R, Travisany D, Chacon C, Pino M, Maass A, Cambiazo V.  
658       2014. Comparative gene expression analysis of Dtg, a novel target gene of Dpp  
659       signaling pathway in the early *Drosophila melanogaster* embryo. *Gene* **535**:210–  
660       217. doi:10.1016/j.gene.2013.11.032
- 661 Hofman K, Stoffel W. 1993. TMbase-A database of membrane spanning proteins  
662       segments. *BiolChem* **374**:166.
- 663 Howard DR, Taylor CR. 1980. An antitumor antibody in normal human serum: reaction  
664       of anti-T with breast carcinoma cells. *Oncology* **37**:142–8. doi:10.1159/000225423
- 665 Hu X, Wang Q, Tang M, Barthel F, Amin S, Yoshihara K, Lang FM, Martinez-ledesma  
666       E, Lee SH, Zheng S, Verhaak RGW. 2018. TumorFusions□: an integrative resource  
667       for cancer-associated transcript fusions. *Nucleic Acids Res* **46**:1144–1149.  
668       doi:10.1093/nar/gkx1018
- 669 Huang X, Jin M, Chen Y-X, Wang J, Zhai K, Chang Y, Yuan Q, Yao K-T, Ji G. 2016.  
670       ERP44 inhibits human lung cancer cell migration mainly via IP3R2. *Aging (Albany*  
671       *NY)* **8**:1276–86. doi:10.18632/aging.100984
- 672 Hung J-S, Huang J, Lin Y-C, Huang M-J, Lee P-H, Lai H-S, Liang J-T, Huang M-C.  
673       2014. CIGALT1 overexpression promotes the invasive behavior of colon cancer  
674       cells through modifying O-glycosylation of FGFR2. *Oncotarget* **5**:2096–106.  
675       doi:10.18632/oncotarget.1815
- 676 Itoh K, Akimoto Y, Fuwa TJ, Sato C, Komatsu A. 2016. Mucin-type core 1 glycans  
677       regulate the localization of neuromuscular junctions and establishment of muscle  
678       cell architecture in *Drosophila*. *Dev Biol* **412**:114–127.  
679       doi:10.1016/j.ydbio.2016.01.032
- 680 Itoh K, Akimoto Y, Kondo S, Ichimiya T, Aoki K. 2018. Glucuronylated core 1 glycans

681 are required for precise localization of neuromuscular junctions and normal  
682 formation of basement membranes on *Drosophila* muscles. *Dev Biol* **436**:108–124.  
683 doi:10.1016/j.ydbio.2018.02.017

684 Ju T, Cummings RD. 2005. Protein glycosylation: Chaperone mutation in Tn syndrome.  
685 *Nature* **437**:1252–1252. doi:10.1038/4371252a

686 Katchman BA, Antwi K, Hostetter G, Demeure MJ, Watanabe A, Decker GA, Miller LJ,  
687 Von Hoff DD, Lake DF. 2011. Quiescin sulfhydryl oxidase 1 promotes invasion of  
688 pancreatic tumor cells mediated by matrix metalloproteinases. *Mol Cancer Res*  
689 **9**:1621–31. doi:10.1158/1541-7786.MCR-11-0018

690 Katchman BA, Ocal IT, Cunliffe HE, Chang Y, Hostetter G, Watanabe A, Lobello J,  
691 Lake DF. 2013. Expression of quiescin sulfhydryl oxidase 1 is associated with a  
692 highly invasive phenotype and correlates with a poor prognosis in Luminal B breast  
693 cancer Expression of quiescin sulfhydryl oxidase 1 is associated with a highly  
694 invasive phenotype and corre. *Breast Cancer Res* **15**:R28. doi:10.1186/bcr3407

695 Kellokumpu S, Sormunen R, Kellokumpu I. 2002. Abnormal glycosylation and altered  
696 Golgi structure in colorectal cancer: dependence on intra-Golgi pH. *FEBS Lett*  
697 **516**:217–24.

698 Kim B-T, Tsuchida K, Lincecum J, Kitagawa H, Bernfield M, Sugahara K. 2003.  
699 Identification and characterization of three *Drosophila melanogaster*  
700 glucuronyltransferases responsible for the synthesis of the conserved  
701 glycosaminoglycan-protein linkage region of proteoglycans. Two novel homologs  
702 exhibit broad specificity toward oligosaccharides from proteoglycans, glycoproteins,  
703 and glycosphingolipids. *J Biol Chem* **278**:9116–24. doi:10.1074/jbc.M209344200

704 Kornfeld R, Kornfeld S. 1985. Assembly of asparagine-linked oligosaccharides. *Annu*  
705 *Rev Biochem* **54**:631–64. doi:10.1146/annurev.bi.54.070185.003215

706 Kubota T, Shiba T, Sugioka S, Furukawa S, Sawaki H, Kato R, Wakatsuki S, Narimatsu  
707 H. 2006. Structural basis of carbohydrate transfer activity by human UDP-GalNAc:  
708 polypeptide alpha-N-acetylgalactosaminyltransferase (pp-GalNAc-T10). *J Mol Biol*  
709 **359**:708–27. doi:10.1016/j.jmb.2006.03.061

710 Lake DF, Faigel DO. 2014. The Emerging Role of QSOX1 in Cancer. *Antioxid Redox*  
711 *Signal* **21**:485–496. doi:10.1089/ars.2013.5572

- 712 Lehmann R, Tautz D. 1994. In Situ Hybridization to RNA. *Methods Cell Biol* **44**:575–  
713 598. doi:10.1016/S0091-679X(08)60933-4
- 714 Letsou A, Arora K, Wrana JL, Simin K, Twombly V, Jamal J, Staehling-Hampton K,  
715 Hoffmann FM, Gelbart WM, Massagué J, O'Connor MB. 1995. Drosophila Dpp  
716 signaling is mediated by the punt gene product: A dual ligand-binding type II  
717 receptor of the TGF $\beta$  receptor family. *Cell* **80**:899–908. doi:10.1016/0092-  
718 8674(95)90293-7
- 719 Lavery SB, Steentoft C, Halim A, Narimatsu Y, Clausen H, Vakhrushev SY. 2015.  
720 Advances in mass spectrometry driven O-glycoproteomics. *Biochim Biophys Acta -*  
721 *Gen Subj* **1850**:33–42. doi:10.1016/j.bbagen.2014.09.026
- 722 Li S, Liu P, Xi L, Jiang X, Wu M, Deng D, Wei J, Zhu T, Zhou L, Wang S, Xu G, Meng  
723 L, Zhou J, Ma D. 2008. Expression of TMEM87B interacting with the human  
724 papillomavirus type 18 E6 oncogene in the Hela cDNA library by a yeast two-  
725 hybrid system. *Oncol Rep* **20**:421–7.
- 726 Li Y. 2003. Scabrous and Gp150 are endosomal proteins that regulate Notch activity.  
727 *Development* **130**:2819–2827. doi:10.1242/dev.00495
- 728 Limas C, Lange P. 1986. T-antigen in normal and neoplastic urothelium. *Cancer*  
729 **58**:1236–45.
- 730 Lin YR, Reddy BVVG, Irvine KD. 2008. Requirement for a core 1 galactosyltransferase  
731 in the Drosophila nervous system. *Dev Dyn* **237**:3703–3714.  
732 doi:10.1002/dvdy.21775
- 733 Linton KM, Hey Y, Saunders E, Jeziorska M, Denton J, Wilson CL, Swindell R, Dibben  
734 S, Miller CJ, Pepper SD, Radford JA, Freemont AJ. 2008. Acquisition of  
735 biologically relevant gene expression data by Affymetrix microarray analysis of  
736 archival formalin-fixed paraffin-embedded tumours. *Br J Cancer* **98**:1403–14.  
737 doi:10.1038/sj.bjc.6604316
- 738 MacLean GD, Longenecker BM. 1991. Clinical significance of the Thomsen-  
739 Friedenreich antigen. *Semin Cancer Biol* **2**:433–9.
- 740 Mao F, Holmlund C, Faraz M, Wang W, Bergenheim T, Kvarnbrink S, Johansson M,  
741 Henriksson R, Hedman H. 2018. Lrig1 is a haploinsufficient tumor suppressor gene  
742 in malignant glioma. *Oncogenesis* **7**:1–12. doi:10.1038/s41389-017-0012-8



- 743 Marshall R. 1972. Glycoproteins. *Annu Rev Biochem* **41**:673–702.
- 744 Matos LL, Suarez ER, Theodoro TR, Trufelli DC, Melo CM, Garcia LF, Oliveira OCG,  
745 Matos MGL, Kanda JL, Nader HB, Martins JRM, Pinhal MAS. 2015. The Profile of  
746 Heparanase Expression Distinguishes Differentiated Thyroid Carcinoma from  
747 Benign Neoplasms. *PLoS One* **10**:e0141139. doi:10.1371/journal.pone.0141139
- 748 Meerbrey KL, Hu G, Kessler JD, Roarty K, Li MZ, Fang JE, Herschkowitz JI, Burrows  
749 AE, Ciccia A, Sun T, Schmitt EM, Bernardi RJ, Fu X, Bland CS, Cooper TA, Schiff  
750 R, Rosen JM, Westbrook TF, Elledge SJ. 2011. The pINDUCER lentiviral toolkit  
751 for inducible RNA interference in vitro and in vivo. *Proc Natl Acad Sci* **108**:3665–  
752 3670. doi:10.1073/pnas.1019736108
- 753 Molin K, Fredman P, Svennerholm L. 1986. Binding specificities of the lectins PNA,  
754 WGA and UEA I to polyvinylchloride-adsorbed glycosphingolipids. *FEBS Lett*  
755 **205**:51–55. doi:10.1016/0014-5793(86)80864-X
- 756 Müller R, Hülsmeier AJ, Altmann F, Ten Hagen K, Tiemeyer M, Hennet T. 2005.  
757 Characterization of mucin-type core-1  $\beta$ 1-3 galactosyltransferase homologous  
758 enzymes in *Drosophila melanogaster*. *FEBS J* **272**:4295–4305. doi:10.1111/j.1742-  
759 4658.2005.04838.x
- 760 Natchiar SK, Suguna K, Surolia A, Vijayan M. 2007. Peanut agglutinin, a lectin with an  
761 unusual quaternary structure and interesting ligand binding properties. *Crystallogr*  
762 *Rev* **13**:3–28. doi:10.1080/08893110701382087
- 763 Ninov N, Menezes-Cabral S, Prat-Rojo C, Manjón C, Weiss A, Pyrowolakis G, Affolter  
764 M, Martín-Blanco E. 2010. Dpp signaling directs cell motility and invasiveness  
765 during epithelial morphogenesis. *Curr Biol* **20**:513–20.  
766 doi:10.1016/j.cub.2010.01.063
- 767 Ntziachristos P, Lim JS, Sage J, Aifantis I. 2014. From Fly Wings to Targeted Cancer  
768 Therapies: A Centennial for Notch Signaling. *Cancer Cell* **25**:318–334.  
769 doi:10.1016/j.ccr.2014.02.018
- 770 Ohtsubo K, Marth JD. 2006. Glycosylation in cellular mechanisms of health and disease.  
771 *Cell* **126**:855–67. doi:10.1016/j.cell.2006.08.019
- 772 Omasits U, Ahrens CH, Müller S, Wollscheid B. 2014. Protter: Interactive protein feature  
773 visualization and integration with experimental proteomic data. *Bioinformatics*

- 774 **30**:884–886. doi:10.1093/bioinformatics/btt607
- 775 Orntoft TF, Mors NP, Eriksen G, Jacobsen NO, Poulsen HS. 1985. Comparative  
776 immunoperoxidase demonstration of T-antigens in human colorectal carcinomas and  
777 morphologically abnormal mucosa. *Cancer Res* **45**:447–52.
- 778 Owens P, Pickup MW, Novitskiy S V, Giltneane JM, Gorska AE, Hopkins CR, Hong CC,  
779 Moses HL. 2015. Inhibition of BMP signaling suppresses metastasis in mammary  
780 cancer. *Oncogene* **34**:2437–49. doi:10.1038/onc.2014.189
- 781 Pacquelet A, Røth P. 1999. Regulatory mechanisms required for DE-cadherin function in  
782 cell migration and other types of adhesion. *J Cell Biol* **170**:803–812.  
783 doi:10.1083/jcb.200506131
- 784 Palmieri M, Impey S, Kang H, di Ronza A, Pelz C, Sardiello M, Ballabio A. 2011.  
785 Characterization of the CLEAR network reveals an integrated control of cellular  
786 clearance pathways. *Hum Mol Genet* **20**:3852–3866. doi:10.1093/hmg/ddr306
- 787 Pickup MW, Hover LD, Guo Y, Gorska AE, Chytil A, Novitskiy S V, Moses HL, Owens  
788 P. 2015. Deletion of the BMP receptor BMPRIa impairs mammary tumor formation  
789 and metastasis. *Oncotarget* **6**:22890–904. doi:10.18632/oncotarget.4413
- 790 Pierce GB. 1974. Neoplasms, differentiations and mutations. *Am J Pathol* **77**:103–118.
- 791 Piller V, Piller F, Cartron J. 1990. Comparison of the carbohydrate-binding specificities  
792 of seven N-acetyl-D-galactosamine-recognizing lectins. *Eur J Biochem* **191**:461–  
793 466. doi:10.1111/j.1432-1033.1990.tb19144.x
- 794 Quistgaard EM, Löw C, Guettou F, Nordlund P. 2016. Understanding transport by the  
795 major facilitator superfamily (MFS): structures pave the way. *Nat Rev Mol Cell Biol*  
796 **17**:123–132. doi:10.1038/nrm.2015.25
- 797 Ratheesh A, Biebl J, Vesela J, Smutny M, Pampusheva E, Krens SFG, Kaufmann W,  
798 Gyoergy A, Casano AM, Siekhaus DE. 2018. Drosophila TNF Modulates Tissue  
799 Tension in the Embryo to Facilitate Macrophage Invasive Migration. *Dev Cell*  
800 **45**:331–346.e7. doi:10.1016/j.devcel.2018.04.002
- 801 Reddy VS, Shlykov MA, Castillo R, Sun EI, Saier MH. 2012. The major facilitator  
802 superfamily (MFS) revisited. *FEBS J* **279**:2022–2035. doi:10.1111/j.1742-  
803 4658.2012.08588.x
- 804 Revoredo L, Wang S, Bennett EP, Clausen H, Moremen KW, Jarvis DL, Ten Hagen KG,

- 805 Tabak LA, Gerken TA. 2016. Mucin-type o-glycosylation is controlled by short-  
806 And long-range glycopeptide substrate recognition that varies among members of  
807 the polypeptide GalNAc transferase family. *Glycobiology* **26**:360–376.  
808 doi:10.1093/glycob/cwv108
- 809 Riedel F, Gillingham AK, Rosa-Ferreira C, Galindo A, Munro S. 2016. An antibody  
810 toolkit for the study of membrane traffic in *Drosophila melanogaster*. *Biol Open*  
811 **5**:987–992. doi:10.1242/bio.018937
- 812 Sahlgren C, Gustafsson M V, Jin S, Poellinger L, Lendahl U. 2008. Notch signaling  
813 mediates hypoxia-induced tumor cell migration and invasion. *Proc Natl Acad Sci U*  
814 *S A* **105**:6392–7. doi:10.1073/pnas.0802047105
- 815 Schindlbeck C, Jeschke U, Schulze S, Karsten U, Janni W, Rack B, Sommer H, Friese K.  
816 2005. Characterisation of disseminated tumor cells in the bone marrow of breast  
817 cancer patients by the Thomsen–Friedenreich tumor antigen. *Histochem Cell Biol*  
818 **123**:631–637. doi:10.1007/s00418-005-0781-6
- 819 Schjoldager KT-BG, Vakhrushev SY, Kong Y, Steentoft C, Nudelman AS, Pedersen NB,  
820 Wandall HH, Mandel U, Bennett EP, Levery SB, Clausen H. 2012. Probing isoform-  
821 specific functions of polypeptide GalNAc-transferases using zinc finger nuclease  
822 glycoengineered SimpleCells. *Proc Natl Acad Sci* **109**:9893–9898.  
823 doi:10.1073/pnas.1203563109
- 824 Schjoldager KT, Joshi HJ, Kong Y, Goth CK, King SL, Wandall HH, Bennett EP,  
825 Vakhrushev SY, Clausen H. 2015. Deconstruction of O-glycosylation--GalNAc-T  
826 isoforms direct distinct subsets of the O-glycoproteome. *EMBO Rep* **16**:1713–1722.  
827 doi:10.15252/embr.201540796
- 828 Schwientek T, Bennett EP, Flores C, Thacker J, Hollmann M, Reis CA, Behrens J,  
829 Mandel U, Keck B, Mireille A, Schäfer, Haselmann K, Zubarev R, Roepstorff P,  
830 Burchell JM, Taylor-Papadimitriou J, Hollingsworth MA, Clausena H. 2002.  
831 Functional conservation of subfamilies of putative UDP-N-  
832 acetylgalactosamine:Polypeptide N-acetylgalactosaminyltransferases in *Drosophila*,  
833 *Caenorhabditis elegans*, and mammals. One subfamily composed of l(2)35Aa is  
834 essential in *Drosophila*. *J Biol Chem* **277**:22623–22638.  
835 doi:10.1074/jbc.M202684200

- 836 Schwientek T, Mandel U, Roth U, Müller S, Hanisch FG. 2007. A serial lectin approach  
837 to the mucin-type O-glycoproteome of *Drosophila melanogaster* S2 cells.  
838 *Proteomics* **7**:3264–3277. doi:10.1002/pmic.200600793
- 839 Segawa H, Kawakita M, Ishida N. 2002. Human and *Drosophila* UDP-galactose  
840 transporters transport UDP-N-acetylgalactosamine in addition to UDP-galactose.  
841 *Eur J Biochem* **269**:128–38.
- 842 Senanayake U, Das S, Vesely P, Alzoughbi W, Frohlich LF, Chowdhury P, Leuschner I,  
843 Hoefler G, Guertl B. 2012. miR-192, miR-194, miR-215, miR-200c and miR-141  
844 are downregulated and their common target ACVR2B is strongly expressed in renal  
845 childhood neoplasms. *Carcinogenesis* **33**:1014–1021. doi:10.1093/carcin/bgs126
- 846 Sheu JJ-C, Lee C-C, Hua C-H, Li C-I, Lai M-T, Lee S-C, Cheng J, Chen C-M, Chan C,  
847 Chao SC-C, Chen J-Y, Chang J-Y, Lee C-H. 2014. LRIG1 modulates  
848 aggressiveness of head and neck cancers by regulating EGFR-MAPK-SPHK1  
849 signaling and extracellular matrix remodeling. *Oncogene* **33**:1375–1384.  
850 doi:10.1038/onc.2013.98
- 851 Siekhaus D, Haesemeyer M, Moffitt O, Lehmann R. 2010. RhoL controls invasion and  
852 Rap1 localization during immune cell transmigration in *Drosophila*. *Nat Cell Biol*  
853 **12**:605–610. doi:10.1038/ncb2063
- 854 Sonoshita M, Aoki M, Fuwa H, Aoki K, Hosogi H, Sakai Y, Hashida H, Takabayashi A,  
855 Sasaki M, Robine S, Itoh K, Yoshioka K, Kakizaki F, Kitamura T, Oshima M,  
856 Taketo MM. 2011. Suppression of colon cancer metastasis by Aes through  
857 inhibition of Notch signaling. *Cancer Cell* **19**:125–37.  
858 doi:10.1016/j.ccr.2010.11.008
- 859 Springer GF. 1997. Immunoreactive T and Tn epitopes in cancer diagnosis , prognosis ,  
860 and immunotherapy 594–602.
- 861 Springer GF. 1989. Tn epitope (N-acetyl-D-galactosamine alpha-O-serine/threonine)  
862 density in primary breast carcinoma: a functional predictor of aggressiveness. *Mol*  
863 *Immunol* **26**:1–5.
- 864 Springer GF. 1984. T and Tn , General Carcinoma Autoantigens. *Science (80- )*  
865 **224**:1198–1206.
- 866 Springer GF, Desai PR, Banatwala I. 1975. Blood group MN antigens and precursors in

- 867 normal and malignant human breast glandular tissue. *J Natl Cancer Inst* **54**:335–9.
- 868 Stanley P, Schachter H, Taniguchi N. 2009. N-Glycans, Essentials of Glycobiology. Cold  
869 Spring Harbor Laboratory Press.
- 870 Steentoft C, Vakhrushev SY, Joshi HJ, Kong Y, Vester-Christensen MB, Schjoldager  
871 KTBG, Lavrsen K, Dabelsteen S, Pedersen NB, Marcos-Silva L, Gupta R, Paul  
872 Bennett E, Mandel U, Brunak S, Wandall HH, Lavery SB, Clausen H. 2013.  
873 Precision mapping of the human O-GalNAc glycoproteome through SimpleCell  
874 technology. *EMBO J* **32**:1478–1488. doi:10.1038/emboj.2013.79
- 875 Steentoft C, Vakhrushev SY, Vester-Christensen MB, Schjoldager KT-BG, Kong Y,  
876 Bennett EP, Mandel U, Wandall H, Lavery SB, Clausen H. 2011. Mining the O-  
877 glycoproteome using zinc-finger nuclease–glycoengineered SimpleCell lines. *Nat*  
878 *Methods* **8**:977–982. doi:10.1038/nmeth.1731
- 879 Stojadinovic A, Hooke JA, Shriver CD, Nissan A, Kovatich AJ, Kao T-C, Ponniah S,  
880 Peoples GE, Moroni M. 2007. HYOU1 / Orp150 expression in breast cancer. *Med*  
881 *Sci Monit* **13**:231–239.
- 882 Summers JL, Coon JS, Ward RM, Falor WH, Miller AW, Weinstein RS. 1983. Prognosis  
883 in carcinoma of the urinary bladder based upon tissue blood group abh and  
884 Thomsen-Friedenreich antigen status and karyotype of the initial tumor. *Cancer Res*  
885 **43**:934–9.
- 886 Tarp MA, Clausen H. 2008. Mucin-type O-glycosylation and its potential use in drug and  
887 vaccine development. *Biochim Biophys Acta* **1780**:546–63.  
888 doi:10.1016/j.bbagen.2007.09.010
- 889 Ten Hagen KG, Tran DT, Gerken TA, Stein DS, Zhang Z. 2003. Functional  
890 characterization and expression analysis of members of the UDP-  
891 GalNAc:polypeptide N-acetylgalactosaminyltransferase family from *Drosophila*  
892 *melanogaster*. *J Biol Chem* **278**:35039–35048. doi:10.1074/jbc.M303836200
- 893 Tepass U, Eileen G, F D, Haag A, Omatyar L, Trk T. 1996. shotgun encodes *Drosophila*  
894 E-cadherin and is preferentially , required during cell rearrangement in the  
895 neurectoderm and other morphogenetically active epithelia 672–685.
- 896 Tian E, Ten Hagen KG. 2009. Recent insights into the biological roles of mucin-type O-  
897 glycosylation. *Glycoconj J* **26**:325–34. doi:10.1007/s10719-008-9162-4

- 898 Tian E, Ten Hagen KG. 2006. Expression of the UDP-GalNAc: Polypeptide N-  
899 acetylgalactosaminyltransferase family is spatially and temporally regulated during  
900 Drosophila development. *Glycobiology* **16**:83–95. doi:10.1093/glycob/cwj051
- 901 Tien AC, Rajan A, Schulze KL, Hyung DR, Acar M, Steller H, Bellen HJ. 2008. Ero1L,  
902 a thiol oxidase, is required for Notch signaling through cysteine bridge formation of  
903 the Lin12-Notch repeats in Drosophila melanogaster. *J Cell Biol* **182**:1113–1125.  
904 doi:10.1083/jcb.200805001
- 905 Tomancak P, Beaton A, Weiszmann R, Kwan E, Shu S, Lewis SE, Richards S,  
906 Ashburner M, Hartenstein V, Celniker SE, Rubin GM. 2002. Systematic  
907 determination of patterns of gene expression during Drosophila embryogenesis.  
908 *Genome Biol* **3**:RESEARCH0088. doi:10.1186/gb-2002-3-12-research0088
- 909 Tomancak P, Berman BP, Beaton A, Weiszmann R, Kwan E, Hartenstein V, Celniker  
910 SE, Rubin GM. 2007. Global analysis of patterns of gene expression during  
911 Drosophila embryogenesis **8**:1–24. doi:10.1186/gb-2007-8-7-r145
- 912 Tran DT, Zhang L, Zhang Y, Tian E, Earl LA, Ten Hagen KG. 2012. Multiple members  
913 of the UDP-GalNAc: Polypeptide N- acetylgalactosaminyltransferase family are  
914 essential for viability in Drosophila. *J Biol Chem* **287**:5243–5252.  
915 doi:10.1074/jbc.M111.306159
- 916 Varki A. 2017. Biological roles of glycans. *Glycobiology* **27**:3–49.  
917 doi:10.1093/glycob/cww086
- 918 Verheyen EM, Cooley L. 1994. Profilin mutations disrupt multiple actin-dependent  
919 processes during Drosophila development. *Development* **120**:717–28.
- 920 Vizcaino JA, Deutch EW, Wang R, Csordas A, Raising F, Rios D, Dianes JA, Sun Z,  
921 Farrah T, Bandeira N, Binz P-A, Xenarios I, Eisenacher M, Mayer G, Gatto L,  
922 Campos A, Chalkley RJ, Kraus H-J, Albar PJ, Martinez-Bartolome S, Apweiler R,  
923 Omenn GS, Martens L, Jones AR, Hermjakob H. 2016. ProteomeXchange provides  
924 globally co-ordinated proteomics data submission and dissemination *Juan* **10**:1939–  
925 1947. doi:10.1038/nprot.2015.121.Human
- 926 Walls G V, Stevenson M, Lines KE, Newey PJ, Reed AAC, Bowl MR, Jeyabalan J,  
927 Harding B, Bradley KJ, Manek S, Chen J, Wang P, Williams BO, Teh BT, Thakker  
928 R V. 2017. Mice deleted for cell division cycle 73 gene develop parathyroid and



- 929 uterine tumours: model for the hyperparathyroidism-jaw tumour syndrome.  
930 *Oncogene* **36**:4025–4036. doi:10.1038/onc.2017.43
- 931 Webb DJ, Nguyen DH, Sankovic M, Gonias SL. 1999. The very low density lipoprotein  
932 receptor regulates urokinase receptor catabolism and breast cancer cell motility in  
933 vitro. *J Biol Chem* **274**:7412–20.
- 934 Yokdang N, Hatakeyama J, Wald JH, Simion C, Tellez JD, Chang DZ, Swamynathan  
935 MM, Chen M, Murphy WJ, Carraway Iii KL, Sweeney C. 2016. LRIG1 opposes  
936 epithelial-to-mesenchymal transition and inhibits invasion of basal-like breast cancer  
937 cells. *Oncogene* **35**:2932–47. doi:10.1038/onc.2015.345
- 938 Yoshida H, Fuwa TJ, Arima M, Hamamoto H, Sasaki N, Ichimiya T, Osawa KI, Ueda R,  
939 Nishihara S. 2008. Identification of the Drosophila core 1  $\beta$ 1,3-galactosyltransferase  
940 gene that synthesizes T antigen in the embryonic central nervous system and  
941 hemocytes. *Glycobiology* **18**:1094–1104. doi:10.1093/glycob/cwn094
- 942 Yu LG, Andrews N, Zhao Q, McKean D, Williams JF, Connor LJ, Gerasimenko O V.,  
943 Hilkens J, Hirabayashi J, Kasai K, Rhodes JM. 2007. Galectin-3 interaction with  
944 Thomsen-Friedenreich disaccharide on cancer-associated MUC1 causes increased  
945 cancer cell endothelial adhesion. *J Biol Chem* **282**:773–781.  
946 doi:10.1074/jbc.M606862200
- 947 Zhang L, Tran DT, Ten Hagen KG. 2010. An O-glycosyltransferase promotes cell  
948 adhesion during development by influencing secretion of an extracellular matrix  
949 integrin ligand. *J Biol Chem* **285**:19491–19501. doi:10.1074/jbc.M109.098145
- 950 Zhang Y, Ran Y, Xiong Y, Zhong Z-B, Wang Z-H, Fan X-L, Ye Q-F. 2016. Effects of  
951 TMEM9 gene on cell progression in hepatocellular carcinoma by RNA interference.  
952 *Oncol Rep* **36**:299–305. doi:10.3892/or.2016.4821
- 953 Zhou Y, Liao Q, Li X, Wang H, Wei F, Chen J, Yang J. 2016. HYOU1 , Regulated by  
954 LPLUNC1 , Is Up-Regulated in Nasopharyngeal Carcinoma and Associated with  
955 Poor Prognosis. *J Cancer* **7**:367–367. doi:10.7150/jca.13695
- 956 Zhou Y, Zhu Y, Fan X, Zhang C, Wang Y, Zhang L, Zhang H, Wen T, Zhang K, Huo X,  
957 Jiang X, Bu Y, Zhang Y. 2017. NID1, a new regulator of EMT required for  
958 metastasis and chemoresistance of ovarian cancer cells. *Oncotarget* **8**:33110–33121.  
959 doi:10.18632/oncotarget.16145



961

## MATERIALS AND METHODS

962

### 963 Fly work

964 Flies were raised on food bought from IMBA (Vienna, Austria) which contained the  
965 standard recipe of agar, cornmeal, and molasses with the addition of 1.5% Nipagin.

966 Adults were placed in cages in a Percival DR36VL incubator maintained at 29°C and  
967 65% humidity; embryos were collected on standard plates prepared in house from apple  
968 juice, sugar, agar and Nipagin supplemented with yeast from Lesaffre (Marcq, France) on  
969 the plate surface. Embryo collections for fixation (7 hour collection) as well as live  
970 imaging (4.5 hour collection) were conducted at 29°C.

971 **Fly Lines utilized:** *srpHemo-GAL4* was provided by K. Brückner (UCSF, USA)  
972 (Bruckner et al., 2004), *UAS-CG8602::FLAG::HA* (from K. VijayRaghavan National  
973 Centre for Biological Sciences, Tata Institute of Fundamental Research) (Guruharsha et  
974 al., 2011). The stocks *w<sup>1118</sup>*; *minerva<sup>3102</sup>* (BDSC-17262), (*pn<sup>1</sup>*;; *ry<sup>503</sup>Dr<sup>1</sup>P[Δ 2-3]*) (BDSC-  
975 1429), *Df(3L)BSC117* (BDSC-8976), *Oregon R* (BDSC-2375), *w<sup>-</sup>*; *P{w[+mC]}=UAS-*  
976 *mCherry.NLS}2;MKRS/Tm6b, Tb[1]* (BDSC-38425), *w<sup>-</sup>,P{UAS-Rab11-GFP}2* (BDSC-  
977 8506), *y[1] sc[\*] v[1]; P{y[+t7.7] v[+t1.8]=TRiP.GL00069}attP2* (BDSC-35195), *y[1]*  
978 *w[\*]; Mi{y[+mDint2]=MIC}GlcAT-P[MI05251]/TM3, Sb[1]* (BDSC-40779) were  
979 obtained from the Bloomington *Drosophila* Stock Centre, Bloomington, USA. The RNAi  
980 lines v60100, v110406, v2826, v101575 were obtained from the Vienna *Drosophila*  
981 Resource Center (VDRC), Vienna, Austria. Lines *w<sup>-</sup>*; *P{w[+mC]; srpHemo-3xmcherry}*,  
982 *w<sup>-</sup>*; *P{w[+mC]; srpHemo-H2A::3xmcherry}* were published previously (Gyoergy et al.,  
983 2018).

### 984 Lines used in figures:

985 **Figure 1D-H:** *w<sup>-</sup>*; +; *srpHemo-3xmcherry*. **I-K:** *w<sup>-</sup> P(w+)UAS-dicer/w<sup>-</sup>*;  
986 *P{attP,y[+],w[3`]/+; srpHemo-Gal4 UAS-GFP, UAS-H2A::RFP/+*, *w<sup>-</sup> P(w+)UAS-*  
987 *dicer2/w<sup>-</sup>*; *RNAi C1GalTA (v110406)/+*; *srpHemo-Gal4 UAS-GFP, UAS-H2A::RFP/+*. **L:**  
988 *w<sup>-</sup>*; +; *srpHemo-H2A::3xmcherry*, *w<sup>-</sup>*; *C1GalTA<sup>2.1</sup>*; *srpHemo-H2A::3xmcherry* **M:** *w<sup>-</sup>*;  
989 *srpHemo-H2A::3xmcherry*, *w<sup>-</sup>*; *srpHemo-H2A::3xmcherry, Mi{MIC}GlcAT-PMI05251*  
990 **Figure S1A-L:** *w<sup>-</sup>*; +; *srpHemo-3xmcherry*. **M, N, P:** *w<sup>-</sup>*, *UAS-Dicer2/w<sup>-</sup>*;  
991 *P{attP,y[+],w[3`]/+; srpHemo-Gal4 UAS-GFP, UAS-H2A::RFP/+*, *w<sup>-</sup> UAS-Dicer2/w<sup>-</sup>*;

992 *RNAi C1GalTA (v110406)/+*; *srpHemo-Gal4 UAS-GFP, UAS-H2A::RFP/+* **O**: w-; +;  
993 *srpHemo-H2A::3xmcherry, w-; C1GalTA<sup>2.1</sup>; srpHemo-H2A::3xmcherry* **Q**: w-;  
994 *srpHemo-H2A::3xmcherry, w-; srpHemo-H2A::3xmcherry, Mi{MIC}GlcAT-PMI05251*  
995 **Figure 2A, B, E**: w-; +; *srpHemo-3xmcherry*, **D**: Oregon R. **F, G, H**: w-; +; *srpHemo-*  
996 *3xmcherry, w-; +; srpHemo-3xmcherry, P{EP}CG8602<sup>3102</sup>*. **I**: w-; *srpHemo-Gal4; UAS-*  
997 *CG8602::FLAG::HA* **Figure S2A, B**: Oregon R. **D**: *P{EP}CG8602<sup>3102</sup>* **Figure 3A**: w-;  
998 +; *srpHemo-H2A::3xmcherry*. **B**: w-; +; *srpHemo-H2A::3xmcherry, P{EP}CG8602<sup>3102</sup>*.  
999 **C**: w-; *srpHemo-CG8602; srpHemo-H2A::3xmcherry P{EP}CG8602<sup>3102</sup>*. **D**: Control: w-;  
1000 *srpHemo-Gal4 UAS-mcherry::nls; +, mutant: w-; srpHemo-Gal4 UAS-mcherry::nls;*  
1001 *P{EP}CG8602<sup>3102</sup>*. Df cross: w-; *srpHemo-Gal4 UAS-mcherry:nls; P{EP}CG8602<sup>3102}/</sup>*  
1002 *Df(3L)BSC117, HA, rescue: w-; srpHemo-Gal4 UAS-mcherry:nls; UAS-*  
1003 *CG8602::FLAG::HA P{EP}CG8602<sup>3102</sup>*, precise excision: *srpHemo-Gal4 UAS-*  
1004 *mcherry:nls; P{EP}CG8602<sup>3102</sup>Δ32*. **E**: w<sup>-</sup> *P(w+)UAS-dicer/+; +; srpHemo-Gal4 UAS-*  
1005 *GFP UAS-H2A:RFP/+*, w- *UAS-dicer2/w-; RNAi CG8602 (v101575)/+; srpHemo-Gal4*  
1006 *UAS-GFP UAS-H2A:RFP/+*. **F**: w<sup>-</sup> *P(w+)UAS-dicer/y[1] v[1]; srpHemo-Gal4 UAS-*  
1007 *mcherry::nls; +, w-; srpHemo-Gal4 UAS-mcherry::nls; P{EP}CG8602<sup>3102</sup>* **G**: w-; +;  
1008 *srpHemo-3xmcherry, w-; +; srpHemo-3xmcherry P{EP}CG8602<sup>3102</sup>, w-; shg<sup>P34</sup>;*  
1009 *srpHemo-3xmcherry P{EP}CG8602<sup>3102</sup>* **H**: w-; +; *srpHemo-3xmcherry, w-; +; srpHemo-*  
1010 *3xmcherry P{EP}CG8602<sup>3102</sup>* **I-L**: w-; +; *srpHemo-H2A::3xmcherry, w-; +; srpHemo-*  
1011 *H2A::3xmcherry P{EP}CG8602<sup>3102</sup>* **Figure S3A**: w-; +; *srpHemo-H2A::3xmcherry, w-;*  
1012 +; *srpHemo-H2A::3xmcherry P{EP}CG8602<sup>3102</sup>, w-; srp-CG8602; srpHemo-*  
1013 *H2A::3xmcherry P{EP}CG8602<sup>3102</sup>* **B, C, E**: w-; +; *srpHemo-Gal4 UAS-GFP UAS-*  
1014 *H2A:RFP/+*, w-; *RNAi CG8602 (v101575)/+; srpHemo-Gal4 UAS-GFP UAS-*  
1015 *H2A::RFP/+*. **D, F**: w-; +; *srpHemo-H2A::3xmcherry, w-; +; srpHemo-H2A::3xmcherry*  
1016 *P{EP}CG8602<sup>3102</sup>* **Figure 4A-H**: w-; +, *srpHemo-3xmcherry, w-; +, srpHemo-*  
1017 *3xmcherry P{EP}CG8602<sup>3102</sup>*. **Figure 4I, S4D, F** Control: w/y, w[1118];  
1018 *P{attP,y[+],w[3']}/srpHemo-Gal4; srpHemo-H2A::3xmcherry/+; Qsox1 RNAi: w<sup>-</sup> w/*  
1019 *y, w[1118];<sup>-</sup>; v108288/srpHemo-Gal4; srpHemo-H2A::3xmcherry/+..* **Figure 4J, S4E** w-;  
1020 +; *srpHemo-3xmcherry; w-; P{SUPor-P}Qsox1KG04615; srpHemo-3xmcherry* **Figure**  
1021 **5C**: w-; *srpHemo-MFSD1; srpHemo-H2A::3xmcherry P{EP}CG8602<sup>3102</sup>*, **F**: w-; +;

1022 *srpHemo-3xmcherry*, *w-; +; srpHemo-3xmcherry P{EP}CG8602<sup>3102</sup>*, *w-; srpHemo-*  
1023 *MFSD1; srpHemo-3xmcherry P{EP}CG8602<sup>3102</sup>*

1024

### 1025 **Embryo Fixation and Immunohistochemistry**

1026 Embryos were collected on apple juice plates from between 6 and 8.5 hours at 29°C.  
1027 Embryos were incubated in 50% Chlorox (DanClorix) for 5 min and washed. Embryos  
1028 were fixed with 17% formaldehyde/heptane for 20 min followed by methanol or ethanol  
1029 devitellinization except for T antigen analysis, when embryos were fixed in 4%  
1030 paraformaldehyde/heptane. Fixed embryos were blocked in BBT (0.1M PBS + 0,1%  
1031 TritonX-100 + 0,1% BSA) for 2 hours at RT. Antibodies were used at the following  
1032 dilutions:  $\alpha$ -T antigen (Steentoft et al., 2011) 1:5,  $\alpha$ -GFP (Aves Labs Inc., Tigard,  
1033 Oregon) 1:500 and incubated overnight at 4°C (GFP) or room temperature (T antigen).  
1034 Afterwards, embryos were washed in BBT for 2 hours, incubated with secondary  
1035 antibodies (ThermoFisher Scientific, Waltham, Massachusetts, USA) at RT for 2 hours,  
1036 and washed again for 2 hours. Vectashield (Vector Laboratories, Burlingame, USA) was  
1037 then added. After overnight incubation in Vectashield at 4°C, embryos were mounted on  
1038 a slide and imaged with a Zeiss Inverted LSM700 Confocal Microscope using a Plain-  
1039 Apochromat 20X/0.8 Air Objective or a Plain-Apochromat 63X/1.4 Oil Objective.

1040

### 1041 **Lectin staining**

1042 Embryos were fixed with 10% formaldehyde/heptane and devitellinized with Ethanol.  
1043 Blocking was conducted in BBT for 2 hours at room temperature. A FITC-labeled lectin  
1044 kit #2 (EY laboratories, San Mateo, USA) was utilized (table below summarizes  
1045 abbreviations of used lectins). Each lectin was diluted to 1:25 and incubated with fixed  
1046 embryos overnight at room temperature (RT). Embryos were washed in BBT for 2 hours  
1047 at RT and Vectashield was added. After overnight incubation at 4°C, embryos were  
1048 mounted on a slide and imaged with a Zeiss Inverted LSM700 Confocal Microscope  
1049 using a Plain-Apochromat 63X/1.4 Oil Objective. Macrophages in late Stage 11 embryos  
1050 were imaged at germband entry and evaluated by eye for enriched staining on  
1051 macrophages compared to other tissues.

|                     |                        |                                    |                             |                                            |                                     |                                             |
|---------------------|------------------------|------------------------------------|-----------------------------|--------------------------------------------|-------------------------------------|---------------------------------------------|
| <b>Lectin</b>       | peanut<br>agglutinin   | Ulex<br>europaeus<br>agglutinin    | Wheat<br>germ<br>agglutinin | Griffonia<br>simplicifolia<br>agglutinin I | Maclura<br>pomifera<br>agglutinin   | Griffonia<br>simplicifolia<br>agglutinin II |
| <b>Abbreviation</b> | PNA                    | UEA-I                              | WGA                         | GS-I                                       | MPA                                 | GS-II                                       |
| <b>Lectin</b>       | Soyabean<br>agglutinin | Dolichos<br>biflorus<br>agglutinin | Concavali<br>n A            | Helix<br>pomatia<br>agglutinin             | Limulus<br>polyphenus<br>agglutinin | Bauhinia<br>purpurea<br>agglutinin          |
| <b>Abbreviation</b> | SBA                    | DBA                                | ConA                        | HPA                                        | LPA                                 | BPA                                         |

1052

1053

### 1054 ***In situ* hybridization**

1055 Embryos were fixed with 10% formaldehyde/heptane for 20 min followed by methanol  
 1056 devitellinization for *in situ* hybridization. A 590bp piece of the CG8602 gene with T7  
 1057 promoter was synthesized using Fw primer TTCATGTGCCTGCTGGGATT, Rv primer  
 1058 GATAATACGACTCACTATAGGGTTACGCTGCAAATCCGCT from the whole fly  
 1059 DNA prep (see below). T7 polymerase-synthesized digoxigenin-labelled anti-sense probe  
 1060 preparation and *in situ* hybridization was performed using standard methods (Lehmann  
 1061 and Tautz, 1994). Images were taken with a Nikon-Eclipse Wide field microscope with a  
 1062 20X 0.5 NA DIC water Immersion Objective.

1063

### 1064 **Macrophage extraction**

1065 Embryos were bleached in 50% Chlorox in water for 5 minutes at RT. Stage late 11/early  
 1066 12 embryos were lined up and then glued to 50 mm Dish No. 0 Coverslip, 14 mm Glass  
 1067 Diameter, Uncoated dish (Zeiss, Germany). Cells from the germband margin were  
 1068 extracted using a ES Blastocyte Injection Pipet (spiked, 20µm inner diameter, 55mm  
 1069 length; BioMedical Instruments, Germany). Extracted cells were placed in Schneider's  
 1070 medium (Gibco) supplemented with 20% FBS (Sigma-Aldrich, Saint Louis, Missouri,  
 1071 USA).

1072

### 1073 **Immunohistochemistry of extracted macrophages**

1074 Extracted macrophages were collected by centrifugation at 500g for 5 min at room  
 1075 temperature. The cell pellet was resuspended in a small volume of Phospho-buffered

1076 saline (PBS) and smeared on a cover slip. The cell suspension was left to dry before cells  
1077 were fixed with 4% paraformaldehyde in 0.1M Phosphate Buffer for 20 min at room  
1078 temperature. Cells were washed 3 times in 0.1M PBS and permeabilized in 0.5% Triton-  
1079 X 100 in PBS. Cells were blocked for 1 hour at room temperature in 20% Fetal Bovine  
1080 Serum + 0.25% Triton X-100 in PBS. Primary antibodies were diluted in blocking buffer:  
1081 anti-HA (Roche, Basel, Switzerland) 1:50, anti-Golgin 84, 1:25, anti-Calnexin 99a 1:25,  
1082 anti-Hrs.8.2 1:25 or anti-Rab7 1:25 all from DSHB (Riedel et al., 2016), and incubated  
1083 for 1 hour at room temperature. Cells were then washed 5 times in blocking buffer.  
1084 Secondary antibodies were diluted in blocking buffer: anti-rat 633 1:300, anti-mouse 488  
1085 1:300 (both from ThermoFisher Scientific, Waltham, Massachusetts, USA). Secondary  
1086 antibodies were incubated for 1 hour at room temperature. Cells were washed 5 times in  
1087 PBS + 0.1% Triton X-100 and mounted in VectaShield+DAPI (LifeTechnologies,  
1088 Carlsbad, USA) utilized at 1:75.

1089

## 1090 **S2 cell work**

1091 S2R+ cells (a gift from Frederico Mauri of the Knoblich laboratory at IMBA, Vienna)  
1092 were grown in Schneider's medium (Gibco) supplemented with 10% FBS (Gibco) and  
1093 transfected with PTS1-GFP (a gift from Dr. McNew) and/or the *srpHemo-*  
1094 *CG8602::3xmcherry* construct using Effectene Transfection Reagent (Qiagen, Hilden,  
1095 Germany) following the manufacturer's protocol. Transfected S2R+ cells were grown on  
1096 Poly-L-Lysine coated coverslips (ThermoFisher Scientific, Waltham, Massachusetts,  
1097 USA) in complete Schneider's medium (Gibco) supplemented with 10% FBS (Sigma-  
1098 Aldrich, Saint Louis, Missouri, USA) and 1% Pen/Strep Gibco() to a confluency of 60%.  
1099 To visualize lysosomes, cells were incubated with LysoTracker 75nM Green DND-26  
1100 (Invitrogen) in complete Schneider's medium for 30 minutes at 25°C. Cells were washed  
1101 in complete Schneider's medium 3 times before imaging on an inverted LSM-700  
1102 (Zeiss). To visualize mitochondria, mitotracker Green FM (Invitrogen) was diluted in  
1103 prewarmed Schneider's medium supplemented with 1% Pen/Strep to a concentration of  
1104 250nM. Cells were incubated in the Mitotracker solution for 45 minutes at 25°C. Cells  
1105 were then washed 3 times in complete Schneider's medium before imaging.

1106



1107 **DNA Isolation from Single Flies**

1108 Single male flies were frozen for at least 3 hours before grinding them in 100mM Tris-  
1109 HCl, 100mM EDTA, 100mM NaCl and 0.5% SDS. Lysates were incubated at 65°C for  
1110 30 minutes. Then 5M KAc and 6M LiCl were added at a ratio of 1:2.5 and lysates were  
1111 incubated on ice for 10 min. Lysates were centrifuged for 15 minutes at 20,000xg,  
1112 supernatant was isolated and mixed with Isopropanol. Lysates were centrifuged again for  
1113 15 minutes at 20,000xg, supernatant was discarded and the DNA pellet was washed in  
1114 70% EtOH and subsequently dissolved in ddH<sub>2</sub>O.

1115

1116 **FACS sorting**

1117 Embryos were collected for 1 hour and aged for an additional 5 hours, all at 29°C.  
1118 Embryos collected from w- flies were processed in parallel and served as a negative  
1119 control. Embryos were dissociated as described previously (Gyoergy et al., 2018). The  
1120 cells were sorted using a FACS Aria III (BD) flow cytometer. Emission filters were  
1121 600LP, 610/20 and 502 LP, 510/50. Data was analyzed with FloJo software (Tree Star).  
1122 The cells from the dissociated negative control w<sup>-</sup> embryos were sorted to set a baseline  
1123 plot.

1124

1125 **qPCR**

1126 RNA was isolated from approximately 50,000 mCherry positive or mCherry negative  
1127 cells using RNeasy Plus Micro Kit (Qiagen, Hilden, Germany following manufacturer's  
1128 protocol. Resulting RNA was used for cDNA synthesis using Sensiscript RT Kit (Qiagen,  
1129 Hilden, Germany) and oligodT primers. A Takyon qPCR Kit (Eurogentec) was used to  
1130 mix qPCR reactions based on the provided protocol. qPCR was run on a LightCycler 480  
1131 (Roche, Basel, Switzerland) and data were analyzed in the LightCycler 480 Software and  
1132 Prism (GraphPad Software). Data are represented as relative expression to a  
1133 housekeeping gene ( $=2^{-\Delta\text{ct}}$ ) or fold change in expression ( $=2^{-\Delta\Delta\text{ct}}$ ). Primer sequences  
1134 utilized for flies were obtained from the FlyPrimerBank  
1135 (<http://www.flyrnai.org/FlyPrimerBank>). Minerva/CG8602: Fw pr  
1136 TGTGCTTCGTGGGAGGTTTC, Rv pr GCAGGCAAAGATCAACTGACC. C1GalTA:  
1137 Fw pr TGCCAACAGTCTGCTAGGAAG, Rv pr CTGTGATGTGCATCGTTCACG.

1138 Ugalt: Fw pr GCAAGGATGCCCGAGAAGTTTG, Rv pr  
1139 GATATAGACCAGCGAGGGGAC. RpL32: Fw pr AGCATACAGGCCCAAGATCG,  
1140 Rv pr TGTTGTCGATAACCCTTGGGC

1141

#### 1142 **Protein preps from embryos for Western**

1143 Embryos were collected for 7 hours at 29°C, bleached and hand-picked for the correct  
1144 Stage. 50-200 embryos were smashed in RIPA buffer (150mM NaCl, 0,5%  
1145 Sodiumdeoxycholat, 0,1% SDS, 50mM Tris, pH 8) with Protease inhibitor (Complete  
1146 Mini, EDTA free, Roche, Basel, Switzerland) using a pellet homogenizer (VWR, Radnor,  
1147 USA) and plastic pestles (VWR, Radnor, USA) and incubated on ice for 30 min.  
1148 Afterwards, samples were centrifuged at 4°C, 16,000g for 30 min and the supernatant was  
1149 collected and used for experiments. The protein concentration was quantified using the  
1150 Pierce BCA Protein Assay Kit (ThermoFisher Scientific, Waltham, Massachusetts,  
1151 USA).

1152

#### 1153 **Western Blots**

1154 30 µg of protein samples were loaded on a 4-15% Mini-PROTEAN TGX Precast Protein  
1155 Gel (Bio-Rad, Hercules, USA) and run at 100V for 80 min in 1x running buffer (25mM  
1156 Tris Base, 190mM glycine and 0.1%SDS) followed by transfer onto Amersham Protran  
1157 Premium 0.45 µm NC (GE Healthcare Lifescience, Little Chalfont, UK) or Amersham  
1158 Hybond Low Fluorescence 0.2 µm PVDF (GE Healthcare Lifescience, Little Chalfont,  
1159 UK) membrane using a wet transfer protocol with 25mM Tris Base, 190 mM Glycine +  
1160 20% MeOH at either 100 Volts for 60 min or 200mA for 90 min at Mini Trans-Blot Cell  
1161 Module (Bio-Rad, Hercules, USA). Membranes were blocked in PBS-T (0.1% Triton X-  
1162 100 in PBS) containing 2% BSA or Pierce Clear Milk Blocking Buffer (ThermoFisher  
1163 Scientific, Waltham, Massachusetts, USA) for 1 hour at RT. Primary antibodies were  
1164 incubated overnight at 4°C at the following concentrations:  $\alpha$ -T antigen (Copenhagen)  
1165 1:10,  $\alpha$ -profilin (Verheyen and Cooley, 1994, DSHB) 1:500, anti-GFP (clone 2B6, Ogris  
1166 lab, MFPL), anti-myc (clone 4A6, Merck Millipore), anti- mouse MFSD1 (Markus  
1167 Damme, University Kiel), anti-GAPDH (ab181603, Abcam, Cambridge, UK).  
1168 Afterwards, blots were washed 3x for 5 min in blocking solution and incubated with Goat

1169 anti Mouse IgG (H/L):HRP (Bio-Rad, Hercules, USA) or goat-anti-rabbit IgG (H+L)-  
1170 HRP (Bio-Rad, Hercules, USA) at 1:5 000 - 10,000 for 1-2 hours at room temperature.  
1171 Blots were washed 2x 5 min in blocking solution and 1x 5 min with PBS-T. Blots were  
1172 developed using SuperSignal West Femto Maximum Sensitivity Substrate (ThermoFisher  
1173 Scientific, Waltham, Massachusetts, USA) according to manufacturer's instructions.  
1174 Chemiluminescent signal was detected using the Amersham Imager 600 (GE Healthcare  
1175 Lifescience) or VersaDoc (Bio-Rad). Images were processed with ImageJ.

1176

### 1177 **Time-lapse imaging, tracking, speed and persistence analysis**

1178 Embryos were dechorionated in 50% bleach for 5 min, washed with water, and mounted  
1179 in halocarbon oil 27 (Sigma-Aldrich, Saint Louis, Missouri, USA) between a coverslip  
1180 and an oxygen permeable membrane (YSI). The anterior dorsolateral region of the  
1181 embryo was imaged on an inverted multiphoton microscope (TrimScope II, LaVision)  
1182 equipped with a W Plan-Apochromat 40X/1.4 oil immersion objective (Olympus).  
1183 mCherry was imaged at 1100 nm excitation wavelengths, using a Ti-Sapphire  
1184 femtosecond laser system (Coherent Chameleon Ultra) combined with optical parametric  
1185 oscillator technology (Coherent Chameleon Compact OPO). Excitation intensity profiles  
1186 were adjusted to tissue penetration depth and Z-sectioning for imaging was set at 1 $\mu$ m for  
1187 tracking and segmentation respectively. For long-term imaging, movies were acquired for  
1188 132 - 277 min with a frame rate of 40 sec. All embryos were imaged with a temperature  
1189 control unit set to 28.5°C.

1190 Images acquired from multiphoton microscopy were initially processed with InSpector  
1191 software (LaVision Bio Tec) to compile channels from the imaging data, and the  
1192 exported files were further processed using Imaris software (Bitplane) to visualize the  
1193 recorded channels in 3D. Macrophage speed and persistence were calculated by using  
1194 embryos in which the macrophage nuclei were labeled with *srpHemo-H2A::3XmCherry*  
1195 (Gyoergy et al., 2018). The movie from each imaged embryo was rotated and aligned  
1196 along the AP axis for tracking analysis. Increasing the gain allowed determination of  
1197 germband position from the autofluorescence of the yolk. Movies for vnc analysis were  
1198 analyzed for 2 hours from the time point that cells started to dive into the channels to  
1199 reach the outer vnc. Macrophage nuclei were extracted using the spot detection function

1200 and nuclei positions in xyz-dimensions were determined for each time point and used for  
1201 further quantitative analysis. Cell speeds and directionalities were calculated in Matlab  
1202 (The MathWorks Inc., Natick, Massachusetts, USA) from single cell positions in 3D for  
1203 each time frame measured in Imaris (Bitplane). Instantaneous velocities from single cell  
1204 trajectories were averaged to obtain a mean instantaneous velocity value over the course  
1205 of measurement. To calculate directionality values, single cell trajectories were split into  
1206 segments of equal length (10 frames) and calculated via a sliding window as the ratio of  
1207 the distance between the macrophage start-to-end location over the entire summed  
1208 distance covered by the macrophage between successive frames in a segment. Calculated  
1209 directionality values were averaged over all segments in a single trajectory and all  
1210 trajectories were averaged to obtain a mean directionality value for the duration of  
1211 measurement, with 0 being the lowest and 1 the maximum directionality.

1212

### 1213 **Fixed embryo image analysis for T antigen levels**

1214 Embryos were imaged with a 63x Objective on a Zeiss LSM700 inverted. 10 $\mu$ m stacks  
1215 (0.5 $\mu$ m intervals) were taken for properly staged and oriented embryos, starting 10 $\mu$ m  
1216 deep in the tissue. These images were converted into Z-stacks in Fiji. ROIs were drawn  
1217 around macrophages (signal), copied to tissue close by without macrophages  
1218 (background) and the average intensity in the green channel of each ROI was measured.  
1219 For each pair of ROIs background was subtracted from signal individually. The average  
1220 signal from control ROIs from one imaging day and staining was calculated and all data  
1221 point from control, mutant and rescue from the same set was divided by this value. This  
1222 way we introduced an artificial value called Arbitrary Unit (AU) that makes it possible to  
1223 compare all the data with each other, even if they come from different imaging days  
1224 when the imaging laser may have a different strength or from different sets of staining.  
1225 Analysis was done on anonymized samples.

1226

### 1227 **Macrophage cell counting**

1228 Transmitted light images of the embryos were used to measure the position of the  
1229 germband to determine the stages for analysis. The extent of germband retraction away  
1230 from the anterior along with the presence of segmentation was used to classify embryos.

1231 Embryos with germband retraction of between 29-31% were assigned to late Stage 11.  
1232 Those with 29-41% retraction for all experiments except the *punt* RNAi (Fig 4J) in which  
1233 35-45% was used (both early Stage 12) were analyzed for the number of macrophages  
1234 that had entered the germband and those with 50-75% retraction (late Stage 12) for the  
1235 number along the ventral nerve cord (vnc), and in the whole embryo. Macrophages were  
1236 visualized using confocal microscopy with a Z-resolution of 3 $\mu$ m and the number of  
1237 macrophages within the germband or the segments of vnc was calculated in individual  
1238 slices (and then aggregated) using the Cell Counter plugin in FIJI.  
1239 To check that this staging allows embryos from the control and *mrva*<sup>3102</sup> mutant to be  
1240 from the same time during development, embryos were collected for 30 minutes and then  
1241 imaged for a further 10 hours using a Nikon-Eclipse Wide field microscope with a 20X  
1242 0.5 NA DIC water Immersion Objective. Bright field images were taken every 5 minutes,  
1243 and the timing of the start of the movies was aligned based on when cellularization  
1244 occurred. We found no significant difference in when germband retraction begins  
1245 (269.6 $\pm$ 9 min in control and 267.1 $\pm$ 3 min in *mrva*<sup>3102</sup>, p=0.75) or in when the germband  
1246 retracts to 41% (300 $\pm$ 9 min for control, 311 $\pm$ 5 min in *mrva*<sup>3102</sup>, p=0.23), or in when the  
1247 germband retraction is complete (386.5 $\pm$ 10 min for control, 401.6 $\pm$ 8 min for *mrva*<sup>3102</sup>,  
1248 p=0.75). n=10 embryos for control and 25 embryos for *mrva*<sup>3102</sup>.

1249

## 1250 Cloning

1251 Standard molecular biology methods were used and all constructs were sequenced by  
1252 Eurofins before injection into flies. Restriction enzymes *Bsi*WI, and *Asc*I were obtained  
1253 from New England Biolabs, Ipswich, Massachusetts, USA (Frankfurt, Germany). PCR  
1254 amplifications were performed with GoTaq G2 DNA polymerase (Promega, Madison,  
1255 USA) using a peqSTAR 2X PCR machine from PEQLAB, (Erlangen, Germany). All  
1256 Infusion cloning was conducted using an Infusion HD Cloning kit obtained from  
1257 Clontech's European distributor (see above); relevant oligos were chosen using the  
1258 Infusion primer Tool at the Clontech website.

1259 **Construction of *srpHemo-minerva*:** A 1467 bp fragment containing the Minerva  
1260 (CG8602) ORF was amplified from the UAS-CG8602:FLAG:HA construct (DGRC)  
1261 using primers Fw GAAGCTTCTGCAAGGATGGCGCGGAGGACGAGGAAC, Rv

1262 CGGTGCCTAGGCGCGCTATTCAAAGTTCTGATAATTCTCG. The fragment was  
1263 cloned into the *srpHemo* plasmid (a gift from Katja Brückner, (Bruckner et al., 2004))  
1264 after its linearization with *AscI*, using an Infusion HD cloning kit.

1265 **Construction of *srpHemo-MFSD1*:** A 1765 bp fragment containing the MFSD1 ORF  
1266 was amplified from cDNA prepared from dendritic cells (a gift from M. Sixt lab) with Fw  
1267 primer TAGAAGCTTCTGCAACTTTGCTTCCTGCTCCGTTTC, Rv primer  
1268 ATGTGCCTAGGCGCGAAGGAAAGGCTTCATCCGCA). The fragment was cloned  
1269 into the *srpHemo* plasmid (a gift from Katja Brückner, (Bruckner et al., 2004)) using an  
1270 Infusion HD cloning kit (Clontech) after its linearization with *AscI* (NEB).

1271 **Construction of *srpHemo-mrva::3xmCherry*:** Minerva (CG8602) was amplified from a  
1272 DNA prep from Oregon flies (Fw primer:  
1273 AGAGAAGCTTCGTACGCGACAACCCTGCTCTACAGAG; Rv primer  
1274 CGACCTGCAGCGTACGACCCGATCCTTCAAAGTTCTG). The vector, PCasper4  
1275 containing a 3xmCherry construct under the control of the *srpHemo* promoter (Gyoergy  
1276 et al., 2018), was digested with *BsiWI* according to the manufacturer's protocol. The  
1277 vector and insert were homologously recombined using the In-Fusion HD Cloning Kit.

1278 **Generation of pInducer20-MFSD1-eGFP constructs:** For C-terminal tagging MFSD1  
1279 was PCR amplified from cDNA prepared from dendritic cells (a gift from M. Sixt lab)  
1280 with the following primers; fw: GATCTCGAGATGGAGGACGAGGATG; rev:  
1281 CGACCGGTA ACTCTGGATGAGAGAGC and digested with *XhoI* and *AgeI* (both  
1282 New England Biolabs, Ipswich, Massachusetts, USA). This MFSD1 fragment was cloned  
1283 into *XhoI/AgeI* digested pGFP-N1 (Addgene, Cambridge, Massachusetts, USA). C-  
1284 terminally eGFP tagged MFSD1 was further PCR amplified with following primers; fw:  
1285 GGGGACAAGTTTGTACAAAAAAGCAGGCTTAATGGAGGACGAGGAT; rev:  
1286 GGGGACCACTTTGTACAAGAAAGCTGGGTATTACTTGTACAGCTC. This  
1287 fragment was cloned using Gateway BP Clonase II Enzyme mix and Gateway LR  
1288 Clonase II Enzyme Mix (ThermoFisher Scientific, Waltham, Massachusetts, USA) via  
1289 donor vector pDonR211 into the final Doxycyclin inducible expression vector  
1290 pInducer20 (Meerbrey et al., 2011) according to manufacturer's instructions. pInducer20-  
1291 MFSD1-eGFP was amplified in *stb13* bacteria (ThermoFisher Scientific, Waltham,  
1292 Massachusetts, USA).

1293

#### 1294 **Precise excision**

1295 *mrva*<sup>3102</sup> flies which contain the 3102 P element insert in the 5' region of CG8602 were  
1296 crossed to a line expressing transposase (BL-1429 (*pn*<sup>1</sup>; *ry*<sup>503</sup>*Dr*<sup>1</sup>P[Δ 2-3]). To allow  
1297 excision of the P Element, males from the F1 generation containing both the P element  
1298 and the transposase, were crossed to virgins with the genotype Sp/Cyo; PrDr/TM3Ser  
1299 (gift from Lehmann lab). In the F2 generation white eyed males were picked and singly  
1300 crossed to Sp/Cyo; PrDr/TM3Ser virgins.

1301

#### 1302 **Mammalian cell culture**

1303 MC-38 colon carcinoma cells (gift from Borsig lab) were kept in DMEM supplemented  
1304 with 10% FCS (Sigma-Aldrich, Saint Louis, Missouri, USA) and Na-Pyruvate  
1305 (ThermoFisher Scientific, Waltham, Massachusetts, USA). All cells were kept in a  
1306 humidified incubator at 37°C with 5% CO<sub>2</sub>. MC-38 cells were transfected with  
1307 pInducer20-MFSD1-tagged constructs according to the manufacturer's instructions using  
1308 Lipofectamin 2000 (ThermoFisher Scientific, Waltham, Massachusetts, USA).  
1309 Expression of tagged MFSD1 was induced with 100ng/μl of Doxycycline for 24 hours  
1310 prior subsequent analysis.

1311

#### 1312 **Cell lysis**

1313 Cells were lysed in lysis buffer (25mM Tris, 150mM NaCl, 1mM EDTA, 1% Triton X-  
1314 100) supplemented with protease inhibitor cocktail (Complete, Roche, Basel,  
1315 Switzerland) for 20 min on ice, followed by centrifugation at 14,000x g, 4°C for 5 min.  
1316 The protein lysates were stored at -80°C. Protein concentration was determined with the  
1317 Pierce BCA Protein Assay Kit (ThermoFisher Scientific, Waltham, Massachusetts,  
1318 USA).

1319

#### 1320 **Immunofluorescence**

1321 Cells were fixed with 4% formaldehyde (ThermoFisher Scientific, Waltham,  
1322 Massachusetts, USA) in PBS for 15 minutes at room-temperature. Cells were washed  
1323 three times with PBS followed by blocking and permeabilization with 1% BSA (Sigma-



1324 Aldrich, Saint Louis, Missouri, USA)/0.3% Triton X-100 in PBS for 1 hour. Antibodies  
1325 were diluted in blocking/permeabilization buffer and incubated for 2 hours at room  
1326 temperature. Primary antibodies used were: anti-GFP (clone 5G4, Ogris lab, MFPL),  
1327 anti-giantin (Biolegend, #19243), anti-GRASP65 (ThermoFisher Scientific, Waltham,  
1328 Massachusetts, USA, PA3-910), anti-LAMP1 (#ab24170, Abcam, Cambridge, UK), anti-  
1329 Rab7 (Cell Signalling Technology, #D95F2), anti-Rab5 (Cell Signalling Technology,  
1330 #C8B1). Cells were washed three times with PBS-Tween20 (0.05%) for 5 minutes each,  
1331 followed by secondary antibody incubation in blocking/permeabilization buffer for 1  
1332 hour at room-temperature. Secondary antibodies used were: goat anti-mouse IgG (H+L)  
1333 Alexa Fluor 488 (ThermoFisher Scientific, Waltham, Massachusetts, USA, A11001),  
1334 goat anti-rabbit IgG (H+L) Alexa Fluor 555 (ThermoFisher Scientific, Waltham,  
1335 Massachusetts, USA, A21428), goat anti-rabbit IgG (H+L) Alexa Fluor 633  
1336 (ThermoFisher Scientific, Waltham, Massachusetts, USA, A21070). Cells were  
1337 counterstained with DAPI (ThermoFisher Scientific, Waltham, Massachusetts, USA) for  
1338 10 minutes in PBS-Tween20%. Cells were mounted with ProLong Gold Antifade  
1339 Mountant (ThermoFisher Scientific, Waltham, Massachusetts, USA, #P36930). Images  
1340 were acquired using a Zeiss LSM880 confocal microscope. Pictures were processed with  
1341 ImageJ.

1342

### 1343 **Embryonic Protein Prep for Glycoproteomics**

1344 150 mg fly embryos were homogenized in 2 ml 0.1% RapiGest, 50mM ammonium  
1345 bicarbonate using a dounce homogenizer. The lysed material was left on ice for 40 min  
1346 with occasional vortexing followed by probe sonication (5 sec sonication, 5 sec pause, 6  
1347 cycles at 60% amplitude). The lysate was cleared by centrifugation (1,000× g for 10  
1348 min). The cleared lysate was heated at 80°C, 10 min followed by reduction with 5mM  
1349 dithiothreitol (DTT) at 60°C, 30 min and alkylation with 10mM iodoacetamide at room  
1350 temperature (RT) for 30 min before overnight (ON) digestion at 37°C with 25µg trypsin  
1351 (Roche). The tryptic digests were labeled with dimethyl stable isotopes as described  
1352 (Boersema et al., 2009). The digests were acidified with 12µL trifluoroacetic acid (TFA),  
1353 37°C, 20 min and cleared by centrifugation at 10,000g, 10 min. The cleared acidified  
1354 digests were loaded onto equilibrated SepPak C18 cartridges (Waters) followed by 3×

1355 CV 0.1% TFA wash. Digests were labeled on column by adding 5 mL 30 mM NaBH<sub>3</sub>CN  
1356 and 0.2% formaldehyde (COH<sub>2</sub>) in 50mM sodium phosphate buffer pH 7.5 (Light,  
1357 *mrva*<sup>3102</sup>), or 30mM NaBH<sub>3</sub>CN and 0.2% deuterated formaldehyde (COD<sub>2</sub>) in 50mM  
1358 sodium phosphate buffer pH 7.5 (Medium, control). Columns were washed using 3 CV  
1359 0.1% FA and eluted with 0.5 mL 50% MeOH in 0.1% FA. The eluates were mixed in 1:1  
1360 ratio, concentrated by evaporation, and resuspended in Jacalin loading buffer (175mM  
1361 Tris-HCl, pH 7.4) Glycopeptides were separated from non-glycosylated peptides by  
1362 Lectin Weak Affinity Chromatography (LWAC) using a 2.8 m column packed in-house  
1363 with Jacalin-conjugated agarose beads. The column was washed with 10 CVs Jacalin  
1364 loading buffer (100 μL/min) before elution with Jacalin elution buffer (175mM Tris-  
1365 HCl, pH 7.4, 0.8M galactose) 4 CVs, 1 mL fractions. The glycopeptide-containing  
1366 fractions were purified by in-house packed Stage tips (Empore disk-C18, 3M).

1367

#### 1368 **Quantitative O-glycoproteomic Strategy**

1369 The glycopeptide quantification based on M/L isotope labeled doublet ratios was  
1370 evaluated to estimate a meaningful cut-off ratio for substantial changes (Schjoldager et  
1371 al., 2015). The labeled glycopeptides produced doublets with varying ratios of the  
1372 isotopic ions as well as a significant number of single precursor ions without evidence of  
1373 ion pairs. Labeled samples from control *srpHemo-3xmcherry* embryos and *mrva*<sup>3102</sup>  
1374 *srpHemo-3xmcherry* mutant embryos were mixed 1:1 and subjected to LWAC  
1375 glycopeptide enrichment. The distribution of labeled peptides from the LWAC flow-  
1376 through showed that the quantitated peptide M/L ratios were normally distributed with  
1377 99.7% falling within +/-0.55 (Log<sub>10</sub>). We selected doublets with less/more than +/-  
1378 0.55(Log<sub>10</sub>) value as candidates for isoform-specific O-glycosylation events.

1379

#### 1380 **Mass spectrometry**

1381 EASY-nLC 1000 UHPLC (Thermo Scientific) interfaced via nanoSpray Flex ion source  
1382 to an -Orbitrap Fusion mass spectrometer (Thermo Scientific) was used for the  
1383 glycoproteomic study. A precursor MS1 scan (m/z 350–1,700) of intact peptides was  
1384 acquired in the Orbitrap at a nominal resolution setting of 120,000. The five most  
1385 abundant multiply charged precursor ions in the MS1 spectrum at a minimum MS1 signal

1386 threshold of 50,000 were triggered for sequential Orbitrap HCD-MS2 and ETD-MS2  
1387 (m/z of 100–2,000). MS2 spectra were acquired at a resolution of 50,000. Activation  
1388 times were 30 and 200 ms for HCD and ETD fragmentation, respectively; isolation width  
1389 was 4 mass units, and 1 microscan was collected for each spectrum. Automatic gain  
1390 control targets were 1,000,000 ions for Orbitrap MS1 and 100,000 for MS2 scans.  
1391 Supplemental activation (20 %) of the charge-reduced species was used in the ETD  
1392 analysis to improve fragmentation. Dynamic exclusion for 60 s was used to prevent  
1393 repeated analysis of the same components. Polysiloxane ions at  $m/z$  445.12003 were used  
1394 as a lock mass in all runs. The mass spectrometry glycoproteomics data have been  
1395 deposited to the ProteomeXchange Consortium (Vizcaino et al., 2016) via the PRIDE  
1396 partner repository with the dataset identifier PXD011045.

#### 1397 **Mass spectrometry Data analysis**

1398 Data processing was performed using Proteome Discoverer 1.4 software (Thermo  
1399 Scientific) using Sequest HT Node as previously described (Schjoldager et al., 2015).  
1400 Briefly, all spectra were initially searched with full cleavage specificity, filtered  
1401 according to the confidence level (medium, low and unassigned) and further searched  
1402 with the semi-specific enzymatic cleavage. In all cases the precursor mass tolerance was  
1403 set to 6 ppm and fragment ion mass tolerance to 20 mmu. Carbamidomethylation on  
1404 cysteine residues was used as a fixed modification. Methionine oxidation and HexNAc  
1405 attachment to serine, threonine and tyrosine were used as variable modifications for ETD  
1406 MS2. All HCD MS2 were pre-processed as described (2) and searched under the same  
1407 conditions mentioned above using only methionine oxidation as variable modification.  
1408 All spectra were searched against a concatenated forward/reverse *Drosophila*  
1409 *melanogaster*-specific database (UniProt, March 2018, containing 39034 entries with  
1410 3494 canonical reviewed entries) using a target false discovery rate (FDR) of 1%. FDR  
1411 was calculated using target decoy PSM validator node. The resulting list was filtered to  
1412 include only peptides with glycosylation as a modification.  
1413 Glycopeptide M/L ratios were determined using dimethyl 2plex method as previously  
1414 described (Schjoldager et al., 2015)

1415

## 1416 **Statistics and Repeatability**

1417 Statistical tests as well as the number of embryos/ cells assessed are listed in the figure  
1418 legends. All statistical analyses were performed using GraphPad Prism and significance  
1419 was determined using a 95% confidence interval. Data points from individual  
1420 experiments / embryos were pooled to estimate mean and standard error of the mean.  
1421 Sample size refers to biological replicates. No statistical method was used to  
1422 predetermine sample size and the experiments were not randomized. For major questions,  
1423 data were collected and analyzed masked. Normality was evaluated by D'Agostino &  
1424 Pearson or Shapiro-Wilk normality test. Unpaired t-test or Mann-Whitney test was used  
1425 to calculate the significance in differences between two groups and One-Way Anova  
1426 followed by Tukey post-test or Kruskal-Wallis test followed by Conover or Dunn's post-  
1427 test for multiple comparisons.

1428

1429 All measurements were performed in 3-38 embryos. Representative images shown in Fig  
1430 1E, F, G, I, Fig 2G, I Fig3 A, B, C Fig 5B, C, F and Supplementary Figures FigS2E-L  
1431 and FigS5 C,D were from separate experiments repeated 3 to 6 times. FigS1A-M is from  
1432 separate experiments that were repeated at least twice. Representative *in situ* images  
1433 shown in Fig 2D and Fig S2A, B, D were from an experiment repeated 3 times. Stills  
1434 shown in Fig 3I, K and Fig S3H are representative images from two-photon movies,  
1435 which were repeated at least 3 times.

1436

1437

1438

1439

### Supplementary Material Legends

1440

1441 **Video 1, related to Fig 3: Representative movie of macrophage migration into the**  
1442 **germband in the control.** Macrophages (red) are labeled with *srpHemo-*  
1443 *H2A::3xmcherry*. The time interval between each acquisition is 40 sec and the display  
1444 rate is 15 frames/sec. Scale bar represents 30 $\mu$ m.

1445

1446 **Video 2, related to Fig 3: Representative movie of macrophage migration into the**  
1447 **germband in the *mrva*<sup>3102</sup> mutant.** Macrophages (red) are labeled with *srpHemo-*  
1448 *H2A::3xmcherry*. The time interval between each acquisition is 40 sec and the display  
1449 rate is 15 frames/ sec. Scale bar represents 30 $\mu$ m.

1450

1451 **Video 3, related to Fig 3: Representative movie of macrophage migration on the vnc**  
1452 **in the control.** Macrophages (red) are labeled with *srpHemo-H2A::3xmcherry*. The time  
1453 interval between each acquisition is 40 ec and the display rate is 15 frames/sec. Scale bar  
1454 represents 30 $\mu$ m

1455

1456 **Video 4, related to Fig 3: Representative movie of macrophage migration on the vnc**  
1457 **in the *mrva*<sup>3102</sup> mutant.** Macrophages (red) are labeled with *srpHemo-H2A::3xmcherry*.  
1458 The time interval between each acquisition is 40 sec and the display rate is 15 frames/  
1459 sec. Scale bar represents 30 $\mu$ m.

1460

1461 **Table S1, related to Fig 4: Mass spectrometric analysis of the T and Tn antigen**  
1462 **containing O-glycoproteome from wild type and *mrva*<sup>3102</sup> mutant Stage 11-12**  
1463 ***Drosophila melanogaster* embryos.** Each row lists an individually identified tryptically  
1464 processed peptide. The 2<sup>nd</sup>-4<sup>th</sup> columns describe the analyzed peptide. The 5<sup>th</sup>, 6<sup>th</sup>, 7<sup>th</sup> and  
1465 12<sup>th</sup> are the names and accessions to Uniprot. The 8<sup>th</sup> indicates the position of the  
1466 modified amino acid. The 9<sup>th</sup> indicates the number and 10<sup>th</sup> the type of glycosylation. The  
1467 11<sup>th</sup> lists the exact position and the 13<sup>th</sup> the exact description of glycosylation. The 14<sup>th</sup> is  
1468 the ratio of the amount of the particular glycopeptide in the control samples (medium)  
1469 over the amount in the *mrva*<sup>3102</sup> (light). The 15<sup>th</sup> is the number of missed cleavages after

1470 the tryptic digest. The 16<sup>th</sup> is the measured intensity. The 17<sup>th</sup> column shows the mass to  
1471 charge ratio.

1472

1473 **Table S2, related to Fig 4: All candidate proteins with at least 3-fold changes in T**  
1474 **and Tn antigen.** Columns list the gene name, the predicted or known function of the  
1475 gene, if other T or Tn glycosites on the protein are unchanged or changed in the opposite  
1476 direction, any known human ortholog (identified by BLAST), references for links to  
1477 cancer and cancer invasion for the mammalian orthologs, the precise site altered, the T  
1478 and Tn antigen changes observed at a particular glycosylation site, the number of  
1479 glycosites on the peptide, the peptide sequence and if the glycosylation site is conserved.  
1480 The site is considered conserved if the human ortholog has a serine or threonine +/- 5  
1481 amino acids from the *Drosophila* glycosite. References: 1. (Gohrig et al., 2014); 2. (Fan  
1482 et al., 2018); 3. (Webb et al., 1999); 4. (C.-C. Chiu et al., 2011); 5. (Huang et al., 2016);  
1483 6. (Matos et al., 2015); 7. (Cawthorn et al., 2012); 8. (Cao et al., 2015) 9. (Walls et al.,  
1484 2017); 10.(Zhou et al., 2017); 11. (Linton et al., 2008); 12. (Bian et al., 2016;) 13. (Zhang  
1485 et al., 2016); 14. (Gonias et al., 2017); 15. (Katchman et al., 2013, 2011); 16.  
1486 (Stojadinovic et al., 2007); 17. (Zhou et al., 2016); 18. (Hu et al., 2018); 19. (Li et al.,  
1487 2008); 20. (Senanayake et al., 2012); 21. (Sheu et al., 2014) (Sheu et al., 2014); 22. (Mao  
1488 et al., 2018); 23.(Yokdang et al., 2016).

1489

1490 **Figure S1. Related to Figure 1: Lectin screen reveals enriched staining for PNA and**  
1491 **UEA-1 on macrophages**

1492 **(A-L)** Confocal images of fixed late Stage 11/ early Stage 12 wild type embryos  
1493 schematic above) stained with different lectins (visualized in green) indicated in green  
1494 type in the lower left corner. Macrophages are detected through srpHemo-3xmCherry  
1495 expression (red). Boxed area in schematic shows area of merged overview image at left.  
1496 Boxed area in merged overview corresponds to the images shown magnified at right. **(M)**  
1497 Confocal images of the germband from fixed early Stage 12 embryos from the control  
1498 and ones in which UAS-C1GalTA RNAi is expressed in macrophages under srpHemo-  
1499 GAL4 control. Macrophages visualized with an antibody against GFP expressed in  
1500 macrophages (srpHemo>GFP) (red) and T antigen by antibody staining (green). Boxed

1501 area in schematic at left indicates embryo region imaged. **(N,O)** Quantification of  
1502 macrophages on the yolk in fixed early Stage 12 embryos in **(N)** *srpHemo>UAS-*  
1503 *C1GalTA RNAi* (*vdrc 2826*) and **(O)** the *C1GalTA[2.1]* excision mutant shows an  
1504 increase in both compared to the control ( $n=14-24$ ,  $p=0.00004$  for N,  $p=0.0007$  for O).  
1505 **(P)** Quantification of macrophage number in the *vnc* segments shown in the schematic in  
1506 fixed mid Stage 12 embryos detects no difference between control and *srpHemo>UAS-*  
1507 *C1GalTA RNAi* embryos ( $n=10-20$ ). **(Q)** Quantification of macrophages on the yolk in  
1508 fixed early Stage 12 embryos in *GlcAT-PMI05251* shows a 20% increase compared to  
1509 the control ( $n=17-20$ ,  $p=0.04$ ). Significance was assessed by Mann-Whitney test in **N** and  
1510 Student's t-test in **O-Q**,  $ns=p>0.05$ ,  $*=p<0.05$ ,  $***=p<0.001$ . Scale bars are  $30\mu\text{m}$  in  
1511 overview images and  $5\mu\text{m}$  in magnifications in **A-L**,  $10\mu\text{m}$  in **M**.

1512

### 1513 **Figure S2. Related to Figure 2: CG8602 expression and localization**

1514 **(A-B, D)** *In situ* hybridization of RNA probes against CG8602. In wild type embryos **(A)**  
1515 maternally deposited CG8602 RNA is evident in Stage 4 embryos and **(B)** uniform lower  
1516 level expression in Stage 13 embryo, with enrichment in the amnioserosa, but none in  
1517 macrophages. **(C)** Schematic depicting the CG8602 gene and the insertion site of the  
1518 EP3102 P element and the  $\Delta 33$  excision mutant induced by P element mobilization which  
1519 removes 914 bp of the ORF. **(D)** Expression of CG8602 RNA is strongly reduced in  
1520 Stage 12 *CG86023102* mutant embryos. **(E-L)** Confocal images of S2R+ cells  
1521 transfected with **(E-G)** *MT-CG8602::FLAG::HA* visualized by  
1522 HA antibody staining (red) or **(H-L)** *srpHemo-CG8602::3xmCherry* with different parts  
1523 of the endomembrane system visualized by antibody staining as indicated (green). DAPI  
1524 (blue) marks the nucleus. CG8602 showed **(E)** no colocalization with the ER marker  
1525 Calnexin, partial colocalization with the **(F)** Golgi marker Golgin84, **(G)** late endosomal  
1526 marker Rab7, **(H)** recycling endosome marker Rab11-YFP, and **(I)** endosomal marker  
1527 Hrs8.2, no colocalization with **(J)** lysosome marker lysotracker, **(K)** mitochondrial  
1528 marker mitotracker and **(L)** peroxisomal marker PTS1-GFP in fixed **(E-I)** or live **(J-L)**  
1529 S2R+ cells. Scale bar is  $50\mu\text{m}$  in A, B and D,  $3\mu\text{m}$  in E-L.

1530



1531 **Figure S3. Related to Figure 3: CG8602 (Minerva) and C1GalTA affect migration**  
1532 **into the germband but not along the vnc. (A)** Quantification of the number of  
1533 macrophages in the germband in embryos from control, *CG86023102*, and *CG86023102*  
1534 *srpHemo(macro)-CG8602::HA* showing CG8602 is required in macrophages for invasion  
1535 of the germband. Macrophages visualized by *srpHemo-H2A::3xmCherry*. **(B)**  
1536 Representative confocal images of early Stage 12 embryos from control and  
1537 *srpHemo(macro)-Gal4* driving *UAS-minerva RNAi* (v101575) expression in macrophages  
1538 labeled by H2A-RFP (green) and cytoplasmic GFP (red). **(C)** Quantification of the  
1539 number of macrophages in vnc segments reveals no significant difference in macrophage  
1540 migration along the vnc between control embryos and those expressing an RNAi against  
1541 CG8602 (v101575) in macrophages under *srpHemo(macro)-GAL4* control (n=19-20,  
1542 p>0.05). **(D, E)** Quantification of the total number of macrophages visualized with **(D)**  
1543 *srpHemo>mcherry::nls* or **(E)** *srpHemo>H2A::RFP, GFP* reveals no significant  
1544 difference between **(D)** control and *CG86023102* mutant embryos (n=15, p>0.05) and **(E)**  
1545 control and *srpHemo(macro)>CG8602 RNAi* embryos (n=26, p=0.1439). The area  
1546 analyzed is indicated with the black box in the schematic above. **(F-I)** Quantification of  
1547 persistence in the head from 2- photon movies with *srpHemo-H2A::3xmCherry* labeling  
1548 macrophages shows no change in the *mrva3102* compared to the control. n=3. # tracks:  
1549 control=329, mutant=340, p=0.2182. **(G)** Quantification of macrophage directionality in  
1550 the inner vnc shows no change in the *mrva3102* compared to the control n=2,3. # tracks:  
1551 control=181, mutant=181, p=0.8826. **(I)** Stills at 0, 60 and 120 min reveal no change in  
1552 macrophage migration in inner vnc in the *mrva3102* mutant compared to the control.  
1553 Significance was assessed by One-way Anova in A and Student's t-test in C-F.  
1554 ns=p>0.05, \* p<0.05, \*\*\* p<0.001. Scale bars are 50µm in B, 30µm in I.

1555

1556 **Figure S4. Related to Figure 4 and table 1. (A)** Work flow for mass spectrometry  
1557 analysis of T and Tn antigen modification on proteins in stage 11/12 control and *mrva*<sup>3102</sup>  
1558 mutant embryos. **(B)** Similar usage of serine (S), threonine (T) and tyrosine (Y) for  
1559 glycosylation in all modified proteins in the control and at glycosites that showed at least  
1560 3fold and 10fold changes in the *mrva*<sup>3102</sup> mutant. **(C)** Analysis of the fractional  
1561 representation of various functions among all T and Tn antigen modified glycoproteins.

1562 **(D)** Increased numbers of macrophages are observed on the yolk neighboring the  
1563 germband upon knockdown with RNAi v108288 of Qsox1 driven in macrophages by  
1564 srpHemo-Gal4 (p=0.02) and **(E)** in the full Qsox1 P element (KG04615) mutant  
1565 compared to the srpHemo-3xmcherry control (p=0.0018). n=24 and 23 for control and  
1566 RNAi, n=18 for both control and P element mutant. Analyzed by Student's t test.

1567

1568 **Figure S5. Related to Figure 5: MFSD1-eGFP localization in colon carcinoma**

1569 **(A)** Alignment of Minerva and mmMFSD1 by BLAST. The first row in blue type shows  
1570 the minerva sequence, the second in black identical (one letter symbol) or similar (+)  
1571 amino acids, and the third in green the mmMFSD1 sequence. Gaps are marked with '-'.  
1572 The predicted twelve transmembrane domains of Minerva are shown with dark blue lines  
1573 and numbered above. **(B)** Western blot of MC-38 colon carcinoma cells with (+) and  
1574 without (-) the induction of MFSD1-eGFP expression from a lentiviraltransduced vector.  
1575 MFSD1-eGFP was detected with an anti-GFP antibody. GAPDH serves as a loading  
1576 control. **(C,D)** Co-immunofluorescence of mouse MFSD1-eGFP (green) and **(C)** early  
1577 endosome marker Rab5 (red) or **(D)** late endosomes marker Rab7 (red) in MC-38 colon  
1578 carcinoma cells show little colocalization. **(C,D)** Nuclei are labeled with DAPI (blue).  
1579 Scale bars indicate 10µm.

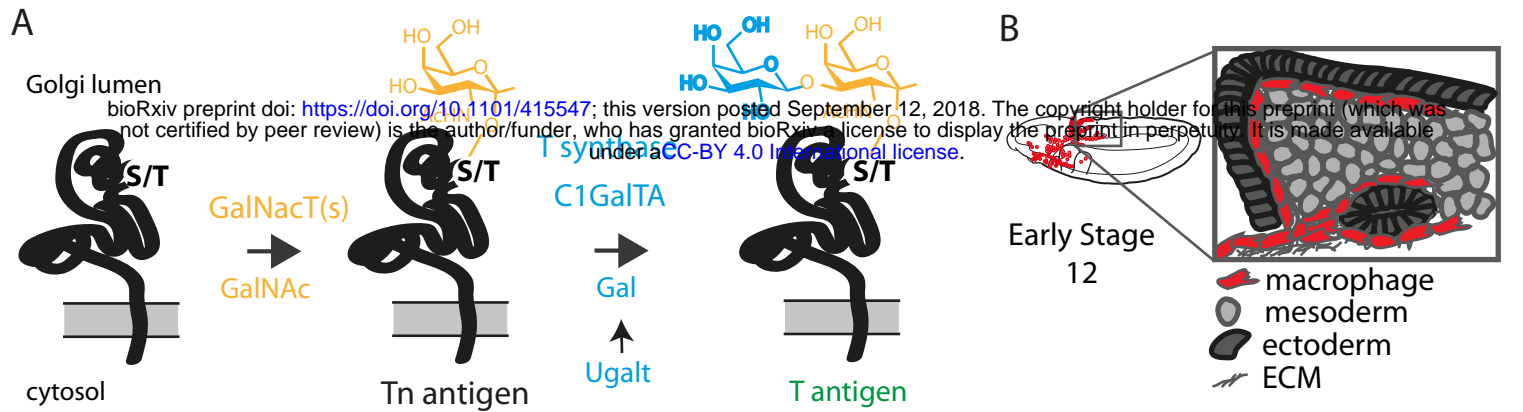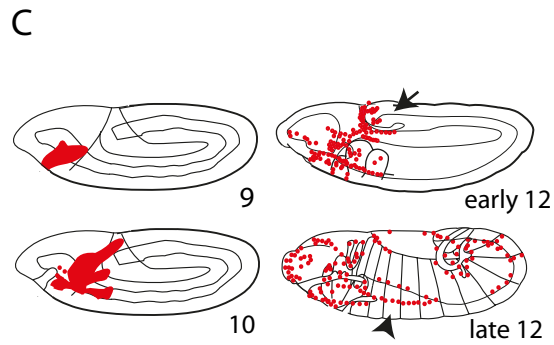

**D** Lectin binding to late St 11 embryonic macrophages

| Lectin              | PNA                                         | UEA-I            | WGA                          | GS-I                     | MPA         | GS-II                           |
|---------------------|---------------------------------------------|------------------|------------------------------|--------------------------|-------------|---------------------------------|
| Binding specificity | terminal galactose                          | $\alpha$ -Fuc    | $\beta$ -GlcNAc              | Melibiose, $\alpha$ -Gal | GalNAc >Gal | Terminal $\alpha/\beta$ -GlcNAc |
| Macrophage staining | Enriched                                    | Enriched         | Present                      | Present                  | Present     | Present                         |
| Lectin              | SBA                                         | DBA              | ConA                         | HPA                      | LPA         | BPA                             |
| Binding specificity | $\alpha/\beta$ -GalNAc, $\alpha/\beta$ -gal | $\alpha$ -GalNAc | $\alpha$ -Man, $\alpha$ -Glu | GalNAc, GlcNAc           | sialic acid | GalNAc                          |
| Macrophage staining | Present                                     | Present          | Present                      | None                     | None        | None                            |

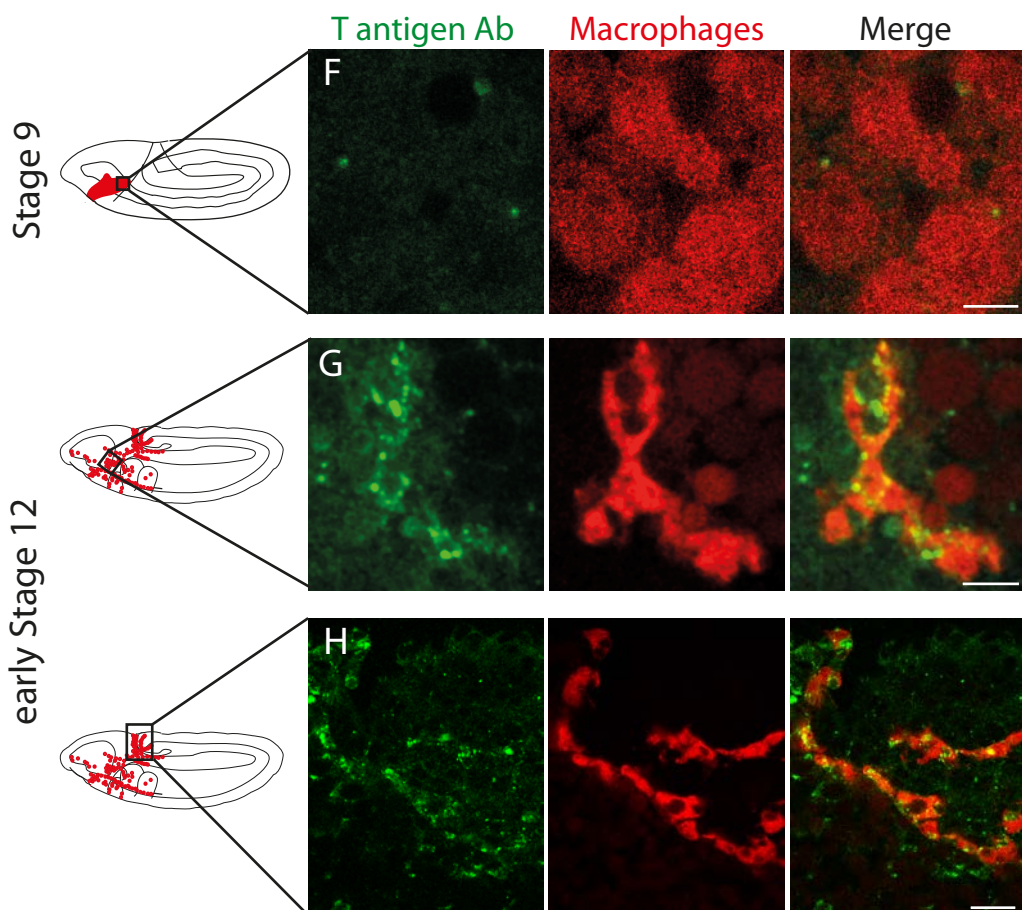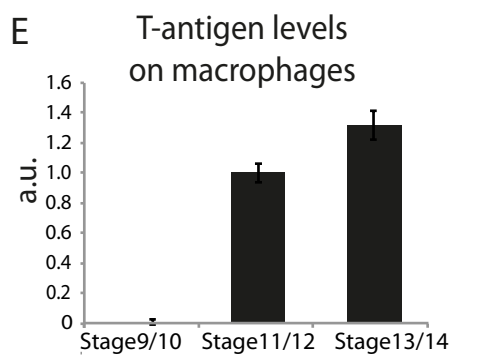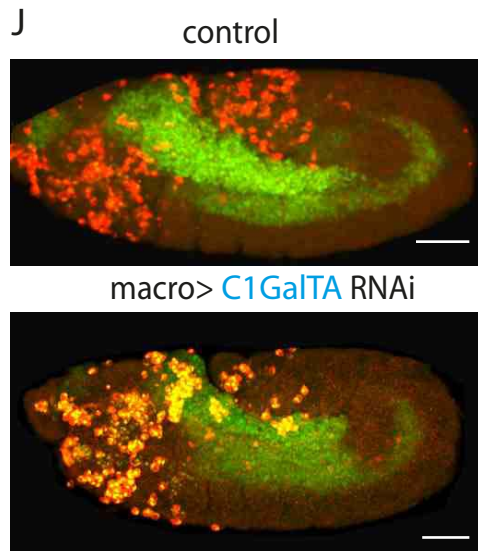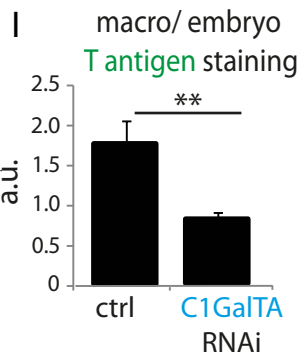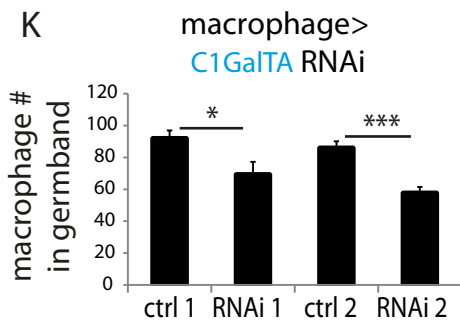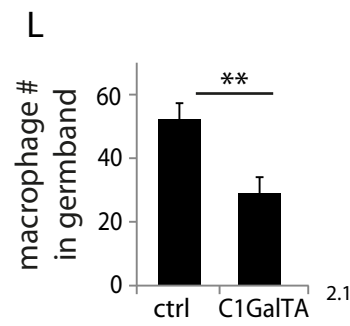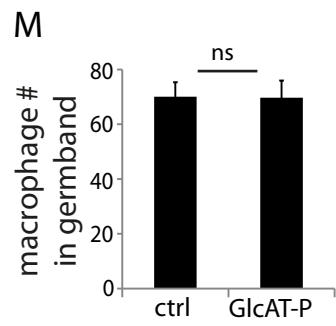

**Figure 1: T antigen is enriched on *Drosophila* macrophages prior to and during their invasion of the extended germband**

(A) Schematic of T antigen modification of serine (S) and threonine (T) on proteins within the Golgi lumen, through successive addition of GalNAc (yellow) by GalNAcTs and Gal (blue) by C1GalTs. UgalT transports Gal into the Golgi. Glycosylation is shown at a much larger scale than the protein. (B) Schematic of an early Stage 12 embryo and a magnification of macrophages (red) entering between the germband ectoderm (dark grey), and mesoderm (light grey). (C) Schematic showing macrophages (red) disseminating from the head mesoderm in Stage 9. By Stage 10, they migrate towards the extended germband, the dorsal vessel and along the ventral nerve cord (vnc). At late Stage 11 germband invasion (arrow) begins and continues during germband retraction. Arrowhead highlights migration along the vnc in late Stage 12. (D) Table summarizing a screen of glycosylation-binding lectins for staining on macrophages invading the germband in late Stage 11 embryos. Enrichment was seen for PNA which recognizes T antigen and UEA-I which recognizes fucose. (E) Quantification of T antigen fluorescence intensities on wild type embryos shows upregulation on macrophages between Stage 9/10 and Stage 11/12. Arbitrary units (au) normalized to 1 for Stage 11)  $p < 0.0001$ . (F-H) Confocal images of fixed lateral wild type embryos from (F) Stage 9 and (G-H) early Stage 12 with T antigen visualized by antibody staining (green) and macrophages by *srpHemo-3xmCherry* expression (red). Schematics at left with black boxes showing the imaged regions. (I) Quantification of control shows T antigen enrichment on macrophages when normalized to whole embryo. RNAi in macrophages against C1GalTA by *srpHemo(macrophage)>C1GalTA RNAi vdr2826* significantly decreases this T antigen staining (n=8 embryos,  $p = 0.0107$ ). (J) Representative confocal images of Stage 12 embryos from control and the aforementioned C1GalTA RNAi. Macrophages marked with cytoplasmic GFP (red) and nuclear RFP (green). (K,L) Quantification of macrophages in the germband in Stage 12 embryos for (K) control and two independent RNAis against C1GalTA (*vdr110406* or *vdr2826*) expressed in macrophages by the *srpHemo-Gal4* driver (n=21-31 embryos,  $p < 0.0001$  and  $0.0174$ ) or (L) in control and the *C1GalTA[2.1]* excision mutant (n=23-24,  $p = 0.0006$ ). Macrophages labeled with *srpHemo-H2A::3xmCherry*. The RNAis and the mutant significantly decreased the macrophage number, arguing that T antigen is required in macrophages for germband entry. (M) Quantification of germband macrophages in early Stage 12 embryos in control and *GlcAT-P<sup>M105251</sup>* embryos shows no defect in macrophage invasion in the mutant (n=17-20,  $p = 0.9617$ ). E analyzed by Kruskal-Wallis test I, K-M analyzed by Student's t-test. ns= $p > 0.05$ , \*  $p < 0.05$ ; \*\*  $p < 0.01$ ; \*\*\*  $p < 0.001$ . Scale bars represent 50 $\mu$ m in J, and 10 $\mu$ m in F-H. See also Fig S1.



# Valoskova et al Figure 2

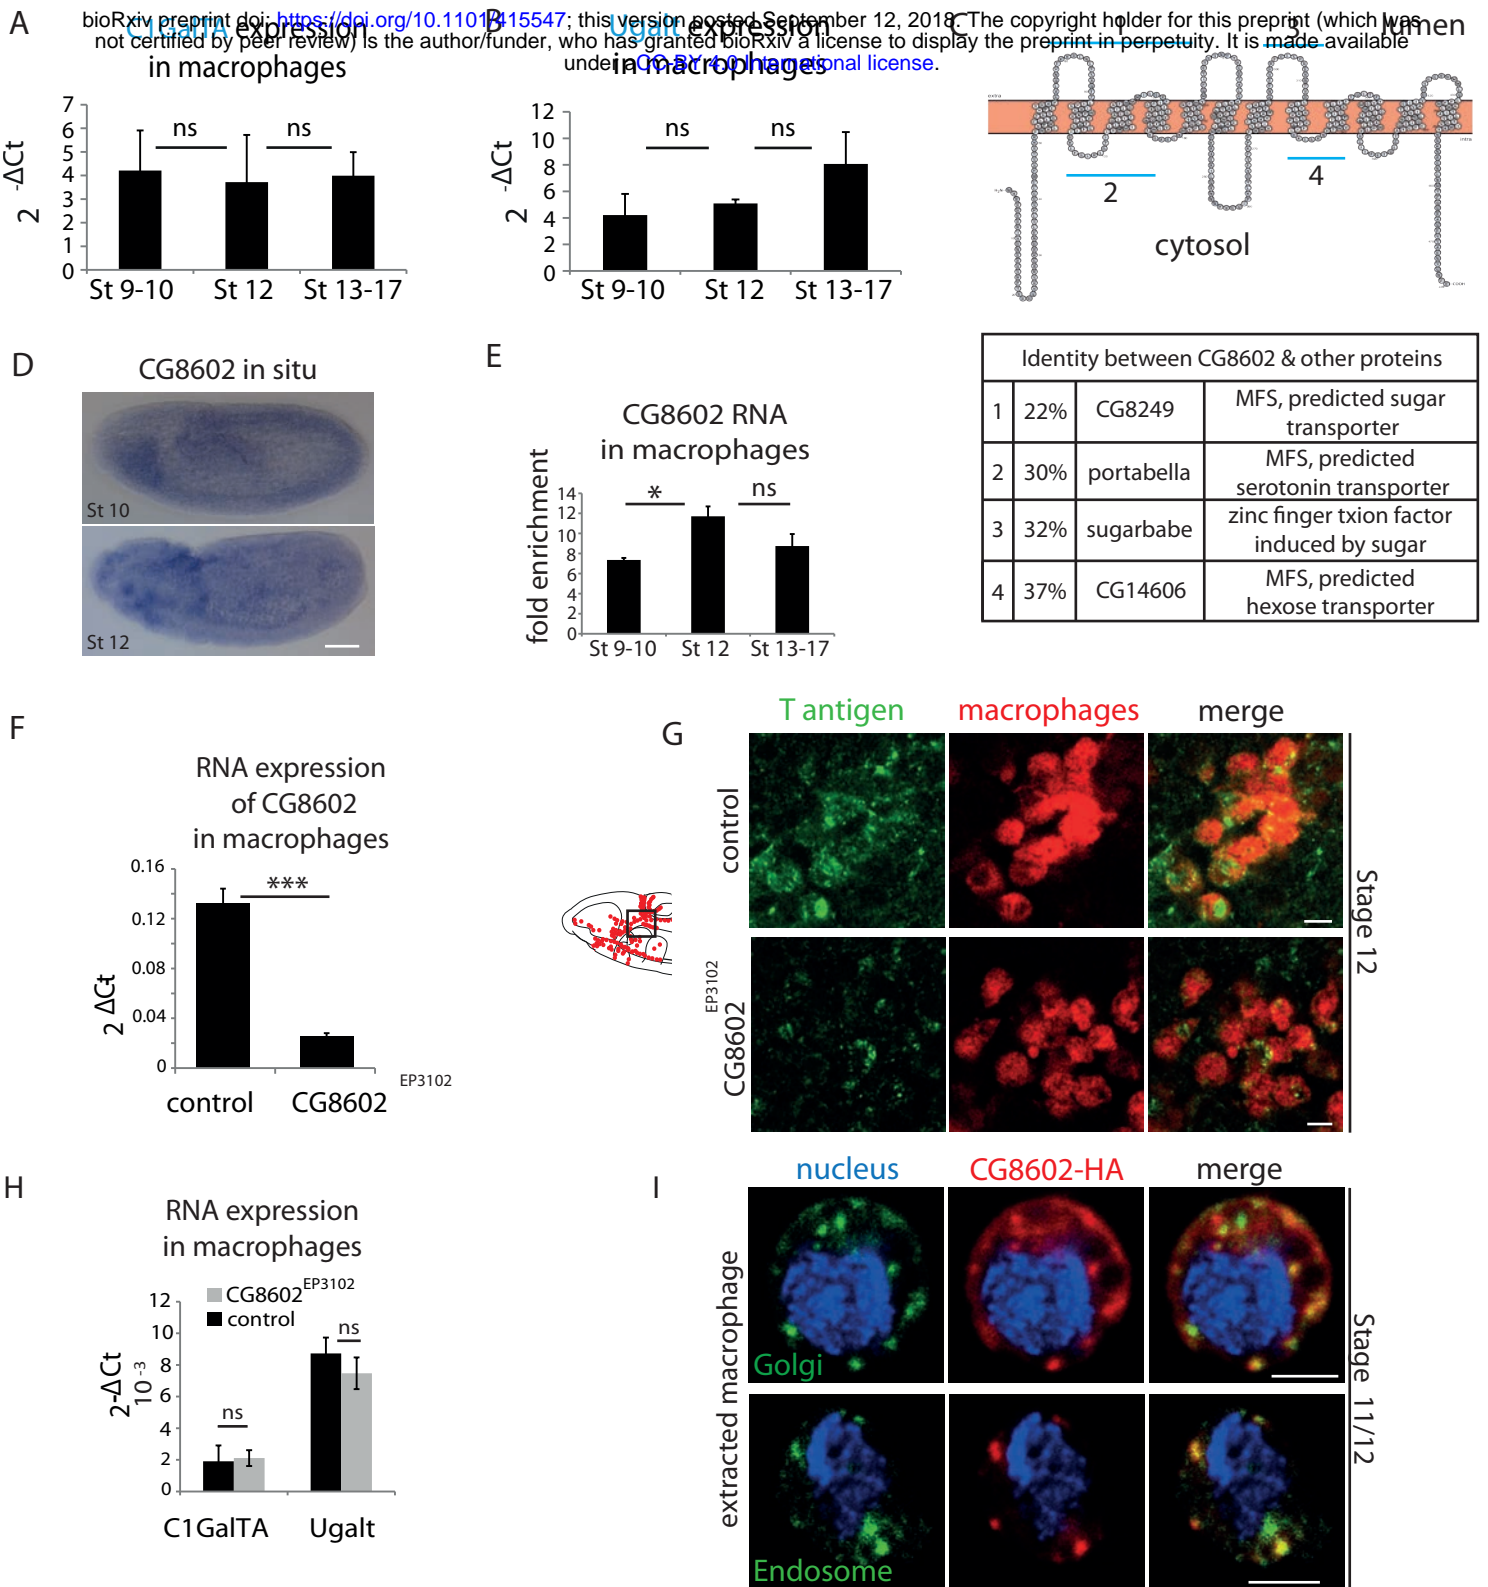

**Figure 2: An atypical MFS family member, CG8602, located in the Golgi and endosomes, is required for T antigen enrichment on invading macrophages**

(A,B) qPCR quantification ( $2^{-\Delta Ct}$ ) of RNA levels in *mCherry*<sup>+</sup> macrophages FACS sorted from *srpHemo-3xmCherry* wild type embryos reveals no significant change in the expression of (A) the C1GalTA galactose transferase or (B) the Ugalt Gal transporter during Stage 9-17 (n=7 biological replicates, 3 independent FACS sorts). (C) Schematic made with Protter (Omasits et al., 2014) showing the predicted 12 transmembrane domains of CG8602. Blue lines indicate regions displaying higher than 20% identity to the correspondingly numbered *Drosophila* protein indicated below, along with the homologous protein's predicted or determined function. (D) *In situ* hybridizations of wild type lateral embryos reveal enriched CG8602 expression in macrophages in Stage 10 and 12 and in the amnioserosa by Stage 12 along with lower level ubiquitous expression. (E) Quantification by qPCR of CG8602 RNA levels in FACS sorted *mCherry*<sup>+</sup> macrophages compared to other *mCherry*<sup>-</sup> cells obtained from *srpHemo-3xmCherry* wild type embryos at Stage 9-10, Stage 12 and Stage 13-17. CG8602 macrophage expression peaks at Stage 12, during macrophage germband entry (n=3-7 biological replicates, 4 independent FACS sorts). (F) qPCR quantification in FACS sorted *srpHemo-3xmCherry* labeled macrophages from control and *CG8602<sup>EP3102</sup>* mutant Stage 12 embryos shows an extremely strong decrease in CG8602 RNA expression in the P element insertion mutant used in this study (n=7 biological replicates, 3 independent FACS sorts). (G) Confocal images of Stage 12 control and *CG8602<sup>EP3102</sup>* mutant embryos with macrophages (red) visualized by *srpHemo-mCherry* expression and T antigen by antibody staining (green). Schematic at left depicts macrophages (red) entering the germband. Black box indicates the region next to the germband imaged at right. We observe decreased T antigen staining on macrophages in the *CG8602<sup>EP3102</sup>* mutant compared to the control. (H) qPCR quantification ( $2^{-\Delta Ct}$ ) of C1GalTA and Ugalt RNA levels in FACS sorted macrophages from Stage 12 embryos from control and *mrva<sup>EP3102</sup>* mutant embryos shows no significant change in expression of the Gal transferase, or the Gal and GalNAc transporter in the mutant compared to the control (n=7 biological replicates, 3 independent FACS sorts). (I) Macrophages near the germband extracted from *srpHemo>CG8602-HA* Stage 11/12 embryos show partial colocalization of the HA antibody labeling CG8602 (red) and a Golgin 84 or Hrs antibody marking the Golgi or endosome respectively (green). Nucleus is stained by DAPI (blue). For all qPCR experiments values are normalized to expression of a housekeeping gene Rpl32. Scale bars are 50 $\mu$ m in D, 5 $\mu$ m in G, 3 $\mu$ m in I. Significance was assessed by Kruskal-Wallis test in A, B, One way Anova in E and Student's t-test in F, H. ns=p>0.05, \* p<0.05, \*\*\* p<0.001. See also Fig S2.

# Valoskova et al Figure 3

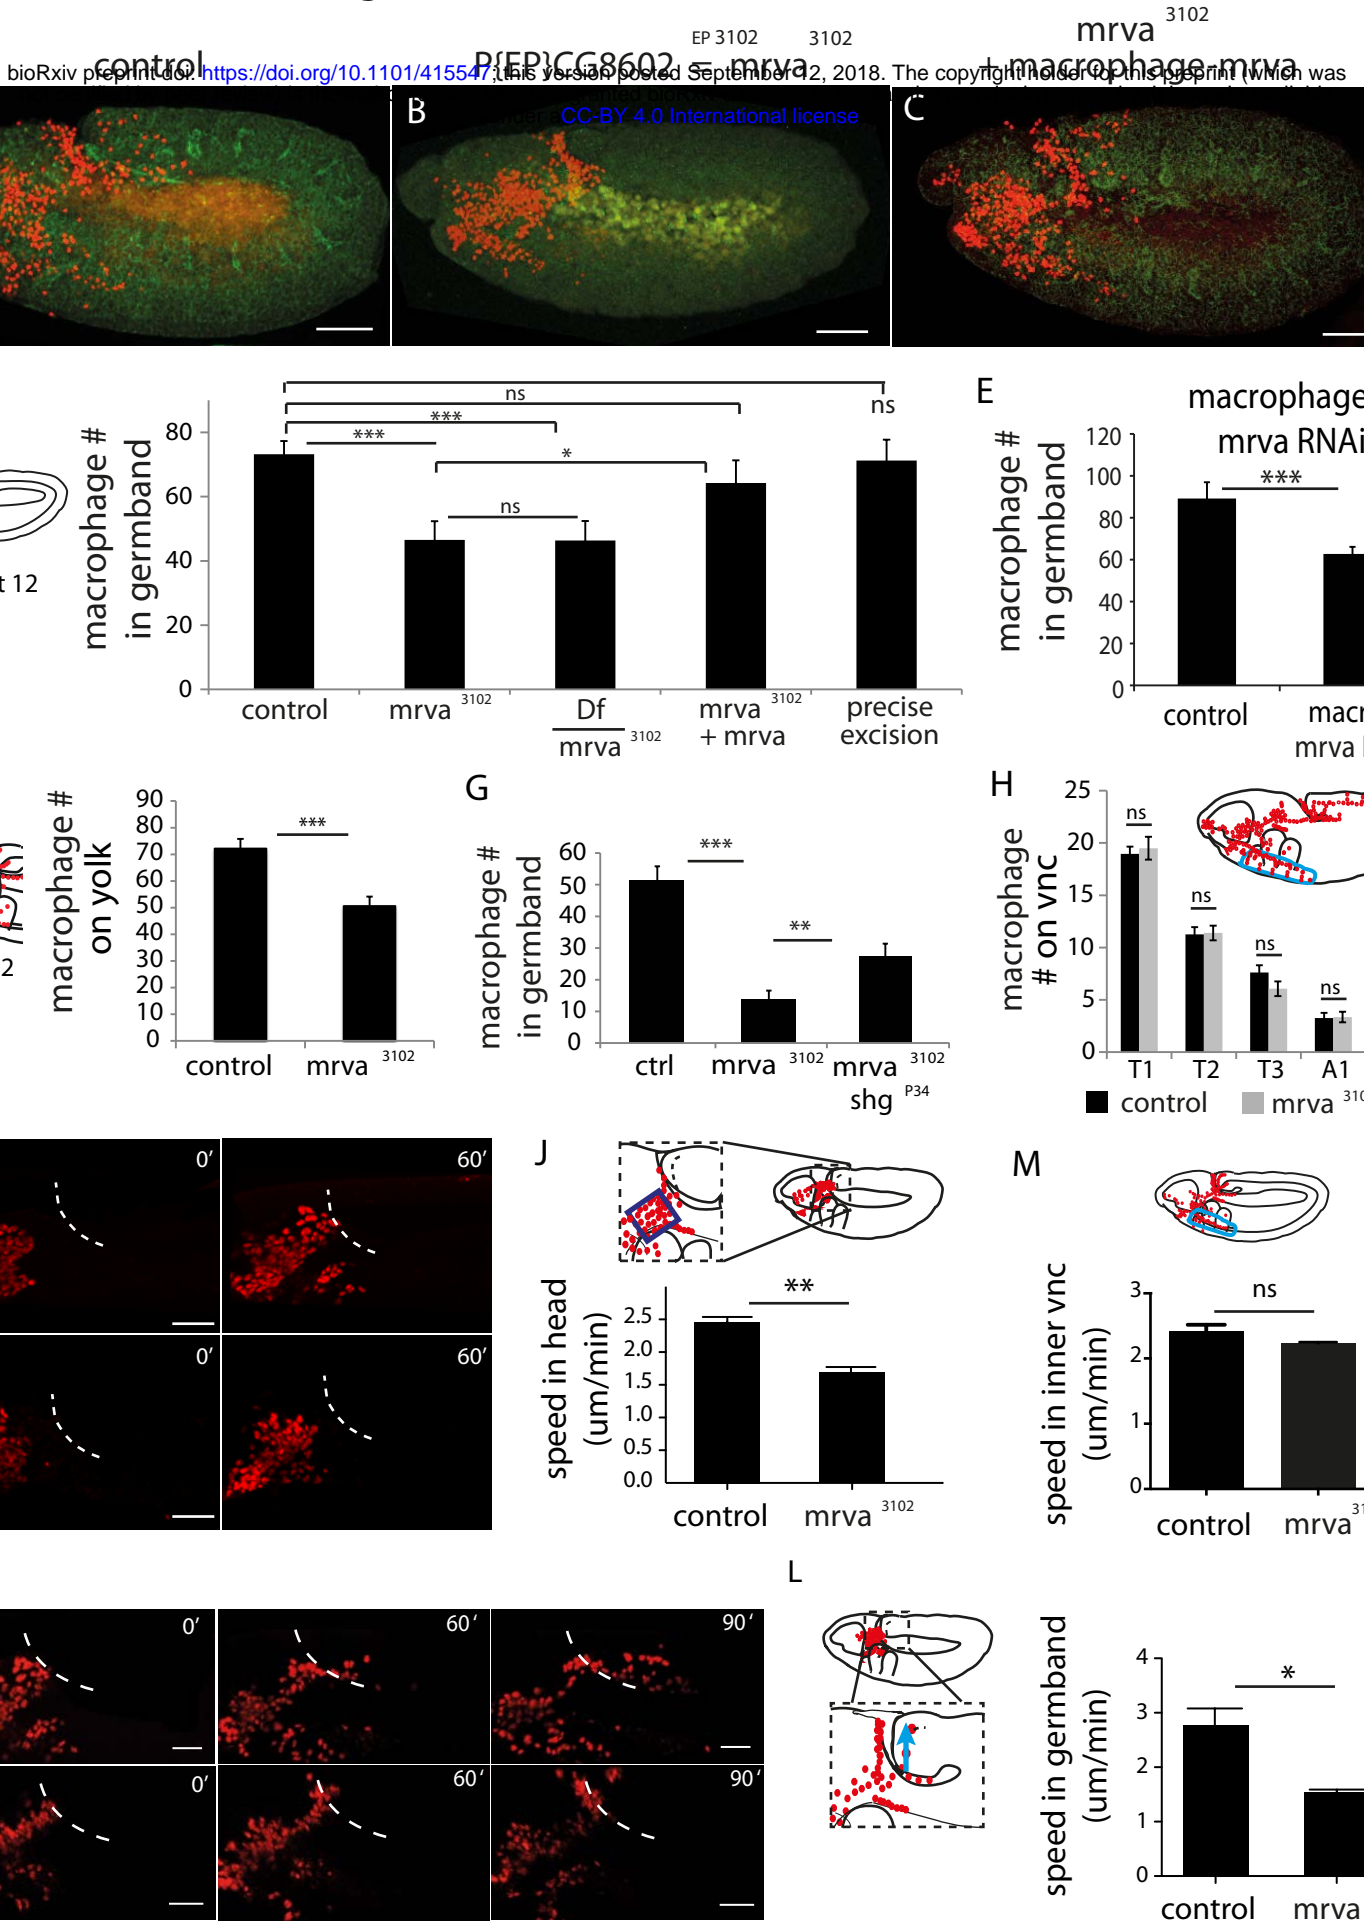



**Figure 3: CG8602, which we name Minerva, is required in macrophages for their efficient invasion of the germband**

(A-C) Representative confocal images of early Stage 12 embryos from (A) control, (B)  $P\{EP\}CG8602^{3102}=minerva$  ( $mrva$ )<sup>3102</sup> mutant, and (C)  $mrva$ <sup>3102</sup> mutants with macrophage expression of the gene rescued by  $srpHemo(macro)-mrva$ . Macrophages express  $srpHemo-3XmCherry$  (red) and the embryo autofluoresces (green). In the mutant, macrophages remain in the head and fail to enter the germband, hence we name the gene *minerva*. (D) Dashed ellipse in schematic at left represents the germband region in which macrophage (red) were counted throughout the study. Comparison of the control (n=38),  $mrva$ <sup>3102</sup> mutants (n=37) and  $mrva$ <sup>3102</sup> mutant/Df(3L)BSC117 that removes the gene (n=23) shows that the mutant significantly decreases migration into the extended germband. This defect can be partially rescued by expression in macrophages of  $srpHemo>mrva::FLAG::HA$  (n=18) (p<0.05) and completely rescued by precise excision ( $mrva$ <sup>A32</sup>) of the P element (n=16).  $srpHemo>mcherry-nls$  labeled the macrophages. (E-G) Macrophage quantification in early Stage 12 embryos. (E) Fewer macrophages in the germband are also observed upon expression of  $mrva$ RNAi v101575 only in macrophages under the control of  $srpHemo$  (n=28-35 embryos). (F) Fewer macrophages found on the yolk neighboring the germband (oval in schematic) in the  $mrva$ <sup>3102</sup> mutant compared to control embryos (n=14-16 embryos, p=0.0003). (G) Increased germband macrophage numbers in  $shg$ <sup>P34</sup>,  $mrva$ <sup>3102</sup> compared to the  $mrva$ <sup>3102</sup> mutant indicates a partial rescue from reducing DE-Cadherin which is expressed in the germband ectoderm (n=19-29). (H) No significant difference in number of macrophages labeled with  $srpHemo-3xmcherry$  in vnc segments (blue oval in schematic) between control and  $mrva$ <sup>3102</sup> mutant embryos in fixed mid Stage 12 embryos (n=23-25). Images from two-photon movies of (I) Stage 10 and (K) late Stage 11-early Stage 12 embryos in which macrophages (red) are labeled with  $srpHemo-H2A::3xmCherry$ . (I) Stills at 0 and 60 min and (J) quantification of macrophage speed reveal 33% slower macrophage migration in the head towards the yolk neighboring the germband in the  $mrva$ <sup>3102</sup> mutant compared to the control, n=3 movies for each, #tracks: control=329, mutant=340, p=0.002. Blue box in magnification in schematic indicates region analysed in J. (K) The time when macrophages reached the germband in each genotype was defined as 0'. Stills at 60 and 90 min and (L) quantification of macrophage speed reveal 43% slower macrophage migration in the germband in the  $mrva$ <sup>3102</sup> mutant compared to the control. Blue arrow in schematic indicates route analyzed. n=3 movies for each, #tracks: control=21, mutant=14, p=0.022. (M) Macrophage speed in the inner vnc in early Stage 12 embryos (see schematic above) shows no significant change in the  $mrva$ <sup>3102</sup> compared to the control, n=3 movies for each, #tracks: control=180, mutant=180, p=0.113. Significance was assessed by Kruskal-Wallis test in D, G, Student's t-test in E, F, H, J, L, M. ns=p> 0.05, \* p<0.05, \*\* p<0.01, \*\*\* p<0.001. Scale bars are 50µm in A-C, 40µm in I, 30µm in K. See also Fig S3.

# Valoskova et al Figure 4

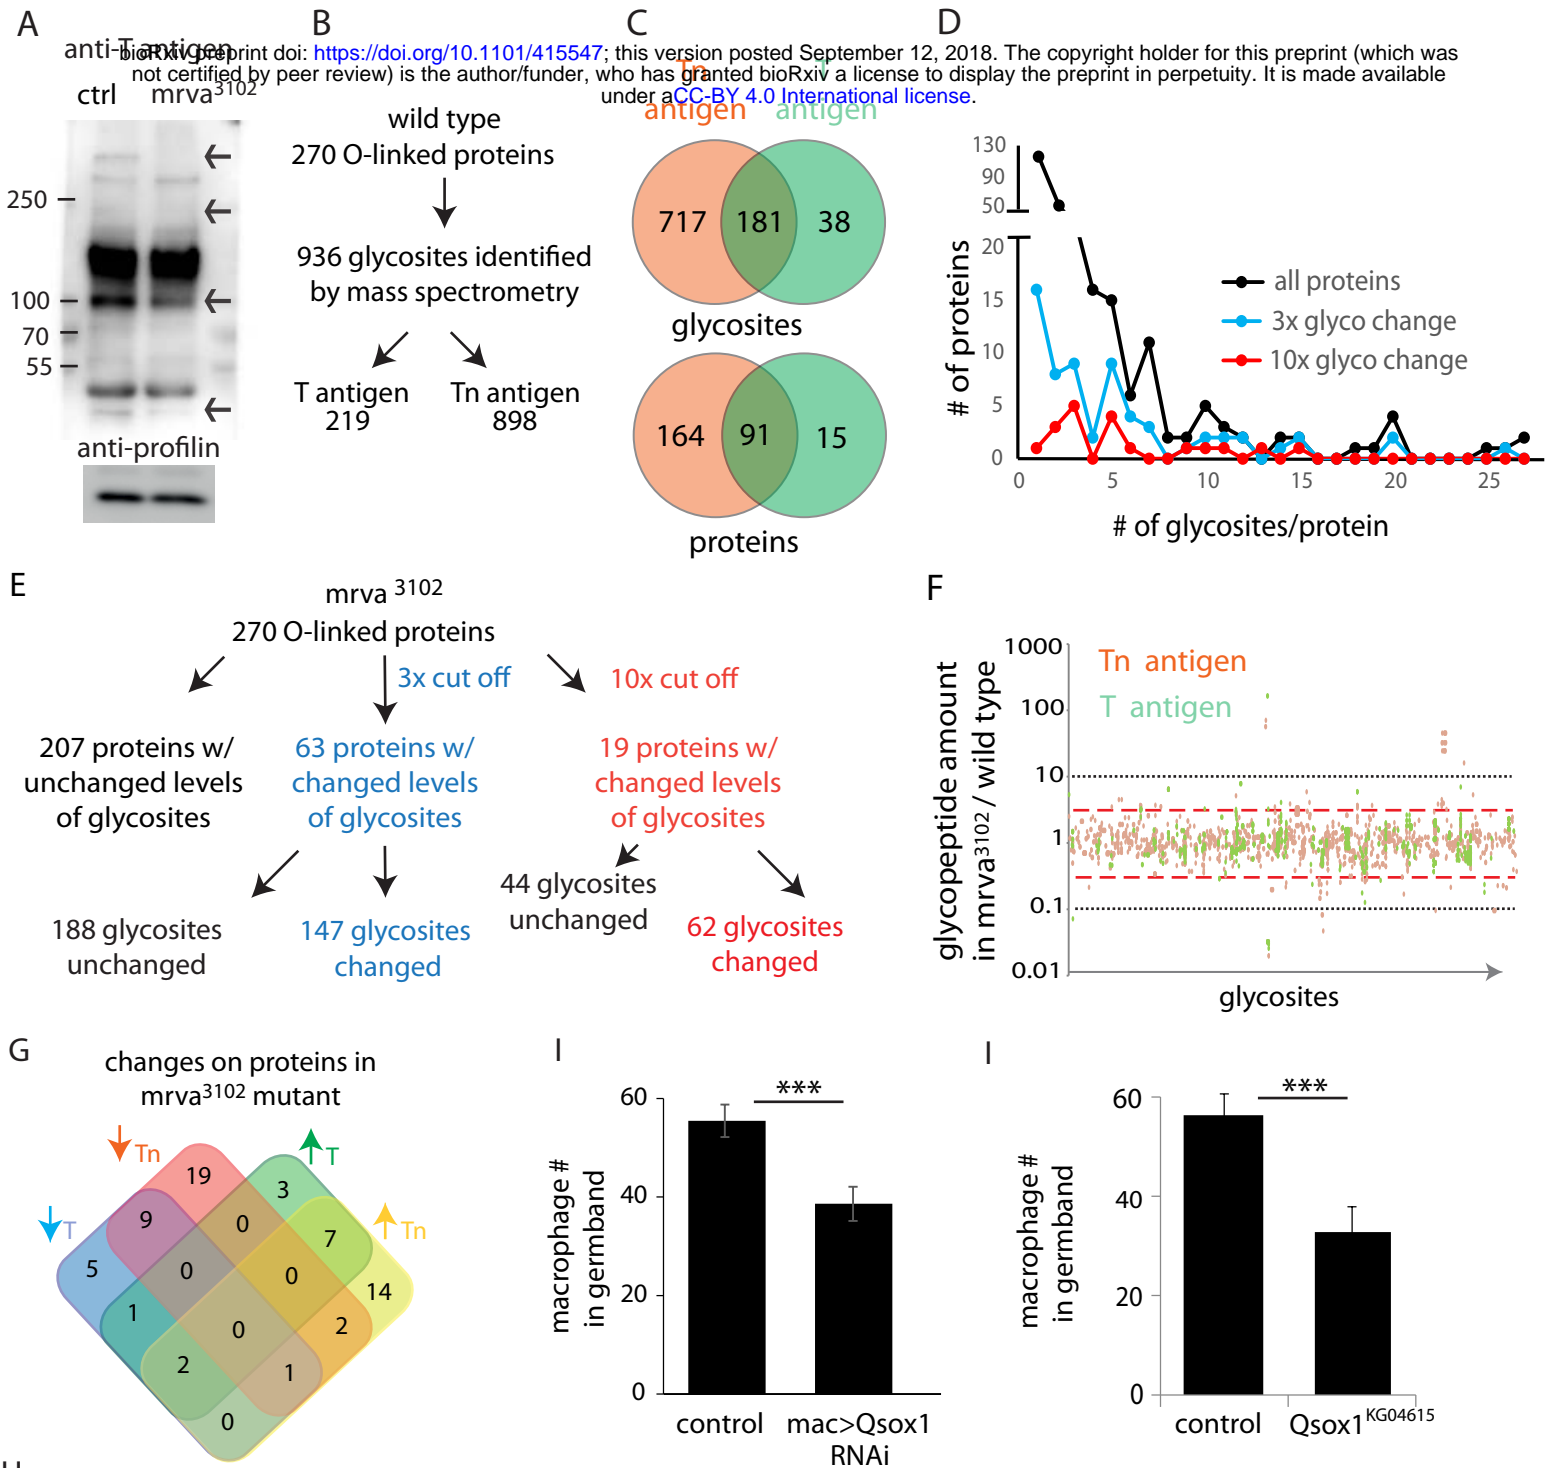

| Glycosite(s) position                                                                   | Gene      | Function                                   | Subcellular localization | T                    | Tn (same sites) | Tn (other sites) | Unchanged GS | Human ortholog | Site conserved | Cancer link |
|-----------------------------------------------------------------------------------------|-----------|--------------------------------------------|--------------------------|----------------------|-----------------|------------------|--------------|----------------|----------------|-------------|
| 294-VHQF <b>S</b> ATPASKI                                                               | Qsox1     | protein disulfide isomerase                | G, ES                    | 52x dec.             | 43x dec.        | no               | yes          | QSOX1          | +              | 1           |
| 321-EAPAK <b>T</b> STTAG                                                                |           |                                            |                          | 13x dec.             | 7x dec.         | 4x inc.          |              |                |                |             |
| 330-AGPLV <b>T</b> VEPTK <b>S</b> IT <b>E</b> PNEE<br>431-SNRQ <b>A</b> S <b>P</b> TEEP | Dtg       | development (dpp target gene)              | CS, vesicles             |                      |                 |                  | yes          | no             | -              | -           |
| 307-IVAS <b>I</b> T <b>S</b> TAKPVT                                                     | CG17667   | axonogenesis                               | ECM                      | 10x dec.             | no              | 4-11x dec.       | no           | no             | -              | -           |
| 903-PVDE <b>I</b> TPTPAE                                                                | CG2918    | heat-shock protein, chaperone              | endo, EC                 | 8x dec.              | 4-8x dec.       | 4-8x dec.        | no           | HYOU1          | -              | 2           |
| 126-KVVEG <b>S</b> AI <b>P</b> T <b>E</b> PKH                                           | CG17660   | lung 7TM receptor-like                     | membrane                 | 6x dec.              | no              | no               | no           | TMEM87B        | +              | 3           |
| 834-VYVV <b>T</b> PQPRH                                                                 | CG7884    | unknown                                    | unknown                  | 6x dec.              | no              | 15x dec.         | no           | no             | -              | -           |
| 371-DAEE <b>A</b> T <b>P</b> PNYD                                                       | GCS2beta  | N-glycan processing                        | endo                     | 5x dec.              | 4-7x dec.       | 7x dec.          | yes          | Glu2B          | -              | -           |
| 129-KYIK <b>S</b> T <b>T</b> EATTQ                                                      | put       | receptor, dpp signaling                    | PM                       | 5x dec.              | 5x dec.         | 5x dec.          | yes          | ACVR2B         | -              | 4           |
| 683-VALP <b>A</b> T <b>A</b> S <b>P</b> V <b>S</b> EVPIK                                | Tango1    | Golgi organization, protein secretion      | ER exit site, G          | 5x dec.,<br>6x inc.  | 5x inc.         | no               | yes          | CTAGE5         | -              | -           |
| 30-AQEF <b>L</b> T <b>K</b> AQGD                                                        | Nplp2     | humoral immune response                    | ES                       | 5x dec.              | no              | no               | no           | no             | -              | -           |
| 487-TVEH <b>S</b> TLVYER                                                                | CG8027    | transferase activity                       | unknown                  | 5x dec.              | no              | 5x dec.          | yes          | GNPTAB         | +              | -           |
| 221-ATGL <b>A</b> T <b>P</b> KPTH                                                       | CG4194    | unknown                                    | unknown                  | 4x dec.              | no              | no               | no           | no             | -              | -           |
| 1087-VHKL <b>V</b> T <b>L</b> LPVR                                                      | CG1273    | unknown                                    | unknown                  | 4x dec.              | no              | no               | yes          | no             | -              | -           |
| 169-KAQE <b>P</b> T <b>S</b> HPAEN                                                      | GCS2alpha | hydrolyse activity (O-glycosyl components) | endo, EC                 | 4x dec.,<br>50x inc. | no              | no               | yes          | GANAB          | +              | 5           |
| 42-LPV <b>E</b> TT <b>R</b> SP <b>T</b> K                                               | Gp150     | receptor, Notch signaling                  | PM                       | 4x dec.              | no              | 4x dec.          | yes          | LRIG1          | -              | 6           |
| 1382-PERT <b>I</b> T <b>P</b> PPPF                                                      | sas       | receptor activity                          | apical PM                | 4x dec.              | no              | no               | yes          | no             | -              | -           |

#### Figure 4: Glycoproteomic analysis reveals Minerva is required for higher levels of T-antigen on a subset of proteins

(A) Representative Western blot of protein extracts from Stage 11/12 control and *mrva*<sup>3102</sup> mutant embryos probed with T antigen antibody. Arrows indicate decreased/missing bands in the mutant compared to the control. Profilin serves as a loading control (n=10 biological replicates). (B) Summary of glycomics results on wild type embryos. (C) Venn diagram indicating number of glycosites or proteins found with T, Tn or T and Tn antigen modifications in the wild type. (D) Plot showing the number of T and Tn antigen glycosites per protein in the total glycoproteome and on proteins that show three and ten-fold altered glycopeptides in the *mrva*<sup>3102</sup> mutant. Proteins strongly affected by Minerva have a higher number of glycosites (p = 0.005). (E) Summary of glycomics on *mrva*<sup>3102</sup> embryos showing the numbers of proteins and glycosites exhibiting three (blue) or ten (red) fold changes in T and Tn antigen levels. (F) T antigen (in orange) and Tn antigen (green) occupied glycosites plotted against the ratio of the levels of glycopeptides found for each glycosite in *mrva*<sup>3102</sup>/control mutant. Higher positions on the plot indicate a lower level of glycosylation in the mutant. Red dashed line represents the cut off for 3x changes in glycosylation, and the black dotted line the 10x one. (G) Venn diagram of the number of proteins with at least 3 fold change in the T antigen (T) or Tn antigen (Tn) glycosylation in the *mrva*<sup>3102</sup> mutant. Up arrows denote increase, down arrows indicate decrease in levels. (H) Proteins with at least a three fold decrease in T antigen levels in the *mrva*<sup>3102</sup> mutant. Glycan modified amino acids are highlighted in bold red font. Unchanged/Higher GS column indicates if any other glycosite on the protein is unchanged or increased. Table does not show the two chitin and chorion related genes unlikely to function in macrophages. G: Golgi, ES: Extracellular space, Endo: Endosomes, ER: Endoplasmic reticulum, ECM: Extracellular Matrix, PM: Plasma Membrane, GS: Glycosite. Cancer links as follows. 1) QSOX1: Promotes cancer invasion *in vitro*, overexpression worse patient outcomes, (Katchman et al., 2013, 2011). 2) HYOU1: Overexpression associated with vascular invasion, worse patient outcomes (Stojadinovic et al., 2007) (Zhou et al., 2016). 3) TMEM87B: translocation breakpoint in cancer, (Hu et al., 2018). 4) ACVR2B: over expressed in renal cancer (Senanayake et al., 2012). 5) GANAB: inhibits cancer invasion *in vitro* (C. Chiu et al., 2011). 6) LRIG1: inhibits cancer invasion *in vitro*, and in mice (Sheu et al., 2014), (Mao et al., 2018). (I, J) Quantification in early Stage 12 embryos showing a significant reduction in germband macrophages (I) upon the expression in macrophages under *srpHemo-GAL4* of a RNAi line (v108288) against Qsox1 (n=24, 23 embryos) and (J) in the P-element mutant KG04615 located in the *Qsox1* 5'UTR. \*\*\*, p=0.0006 via Student's t-test. See also Fig S4, Table S1 and Table S2.

# Valoskova et al Figure 5

bioRxiv preprint doi: <https://doi.org/10.1101/415547>; this version posted September 12, 2018. The copyright holder for this preprint (which was not certified by peer review) is the author/funder, who has granted bioRxiv a license to display the preprint in perpetuity. It is made available under aCC-BY 4.0 International license.

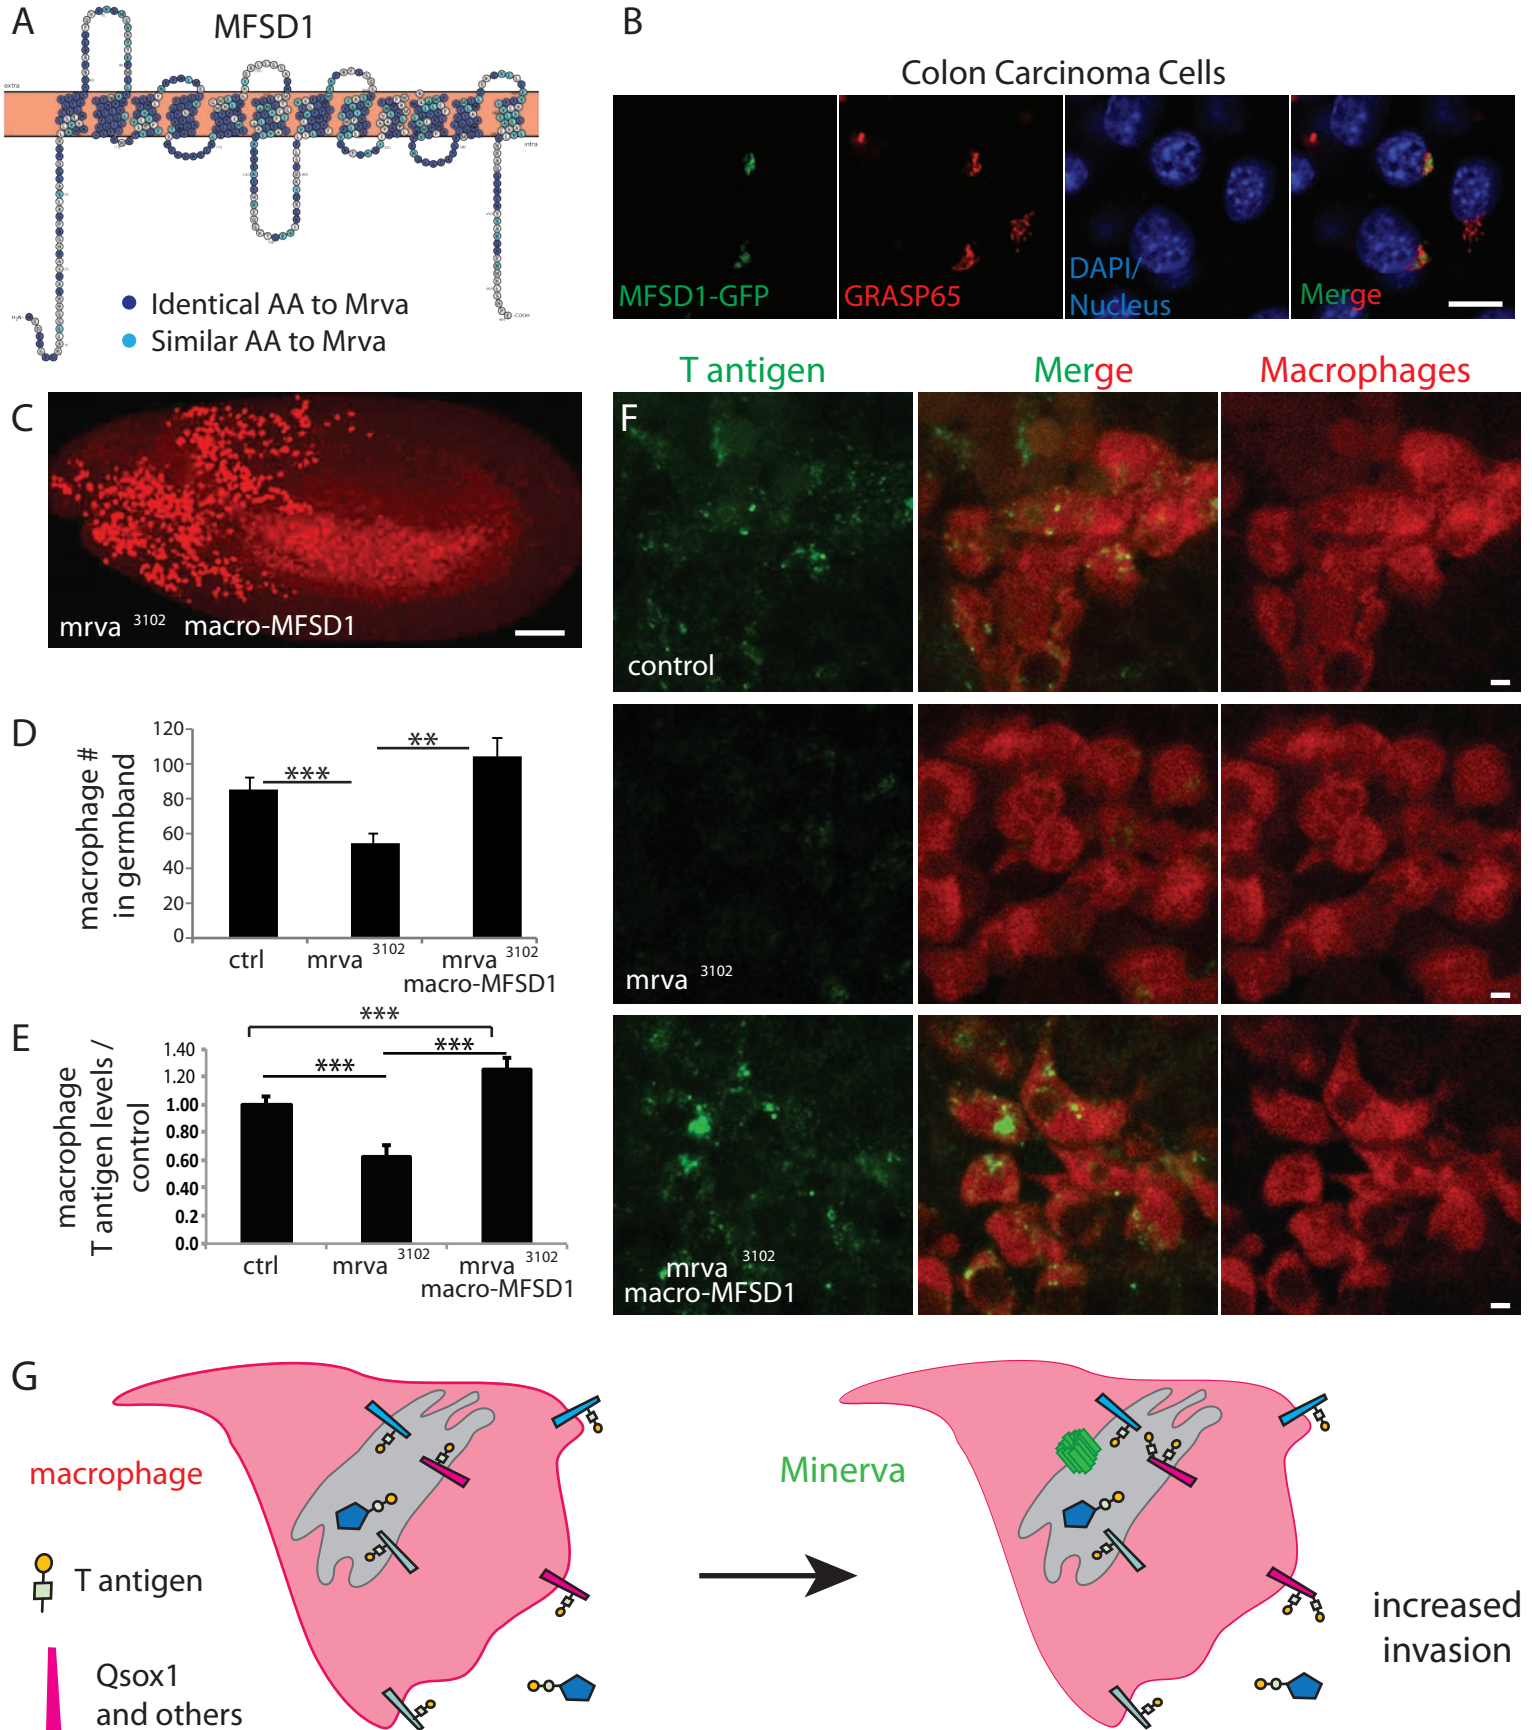

**Figure 5: Minerva's murine ortholog, MFSD1, can substitute for Minerva's functions in migration and T-antigen glycosylation**

(A) Topology prediction of mouse MFSD1 (NP\_080089.1) using the online tools TMPred (Hofman and Stoffel, 1993) and Protter (Omasits et al., 2014). 50% of amino acids are identical between the *M. musculus* MFSD1 and *D. melanogaster* sequence of *mrva* (CG8602) (NP648103.1) and are highlighted in dark blue, similar amino acids are in light blue. (B) Confocal images of MC38 colon carcinoma cells showing colocalization of MFSD1-eGFP (green) with Golgi marker GRASP65 (red). DAPI labels the nucleus (blue). (C) Confocal image of a Stage 12 fixed embryo showing that expression of *mmMFSD1* in macrophages under the direct control of the *srpHemo(macro)* promoter in the *mrva*<sup>3102</sup> mutant can rescue the defect in macrophage migration into the germband. Compare to Fig 3A,B. Macrophages visualized with *srpHemo-H2A::3xmcherry* for C-D. (D) Quantitation of the number of macrophages in the germband of early Stage 12 embryos from the control (n=25), *mrva*<sup>3102</sup> mutants (n=29), and *mrva*<sup>3102</sup> *srpHemo(macro)-mmMFSD1* (n=13, p<0.001). (E) Quantification of T antigen levels on macrophages in late Stage 11 embryos from control, *mrva*<sup>3102</sup> mutant and *mrva*<sup>3102</sup> *srpHemo(macro)-mmMFSD1* embryos. T antigen levels normalized to those observed in the control (n=8-9 embryos, 280, 333, and 289 cells quantified respectively, p <0.001). (F) Confocal images of macrophages (red) on the germband border stained with T antigen antibody (green) in the control, the *mrva*<sup>3102</sup> mutant, and *mrva*<sup>3102</sup> *srpHemo(macro)-mmMFSD1* shows that *mmMFSD1* expression in macrophages can rescue the decrease of macrophage T antigen observed in the *mrva*<sup>3102</sup> mutant. Macrophages visualized with *srpHemo-3xmcherry* for E-F. (G) Model for Minerva's function during macrophage invasion. Minerva in the Golgi (grey) leads to increases in T antigen levels on a subset of proteins that aid invasion, including Qsox1, a sulfhydryl oxidase that regulates protein folding through disulfide bond isomerization. Significance was assessed by Kruskal-Wallis test in D,E. \*\*\*=p<0.001. Scale bars are 10µm in B, 50µm in D, and 3µm in F. See also Fig S5.



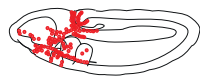

macrophages

merged over-  
 bioRxiv preprint doi: <https://doi.org/10.1101/415547>; this version posted September 12, 2018. The copyright holder for this preprint (which was not certified by peer review) is the author/funder, who has granted bioRxiv a license to display the preprint in perpetuity. It is made available under aCC-BY 4.0 International license.

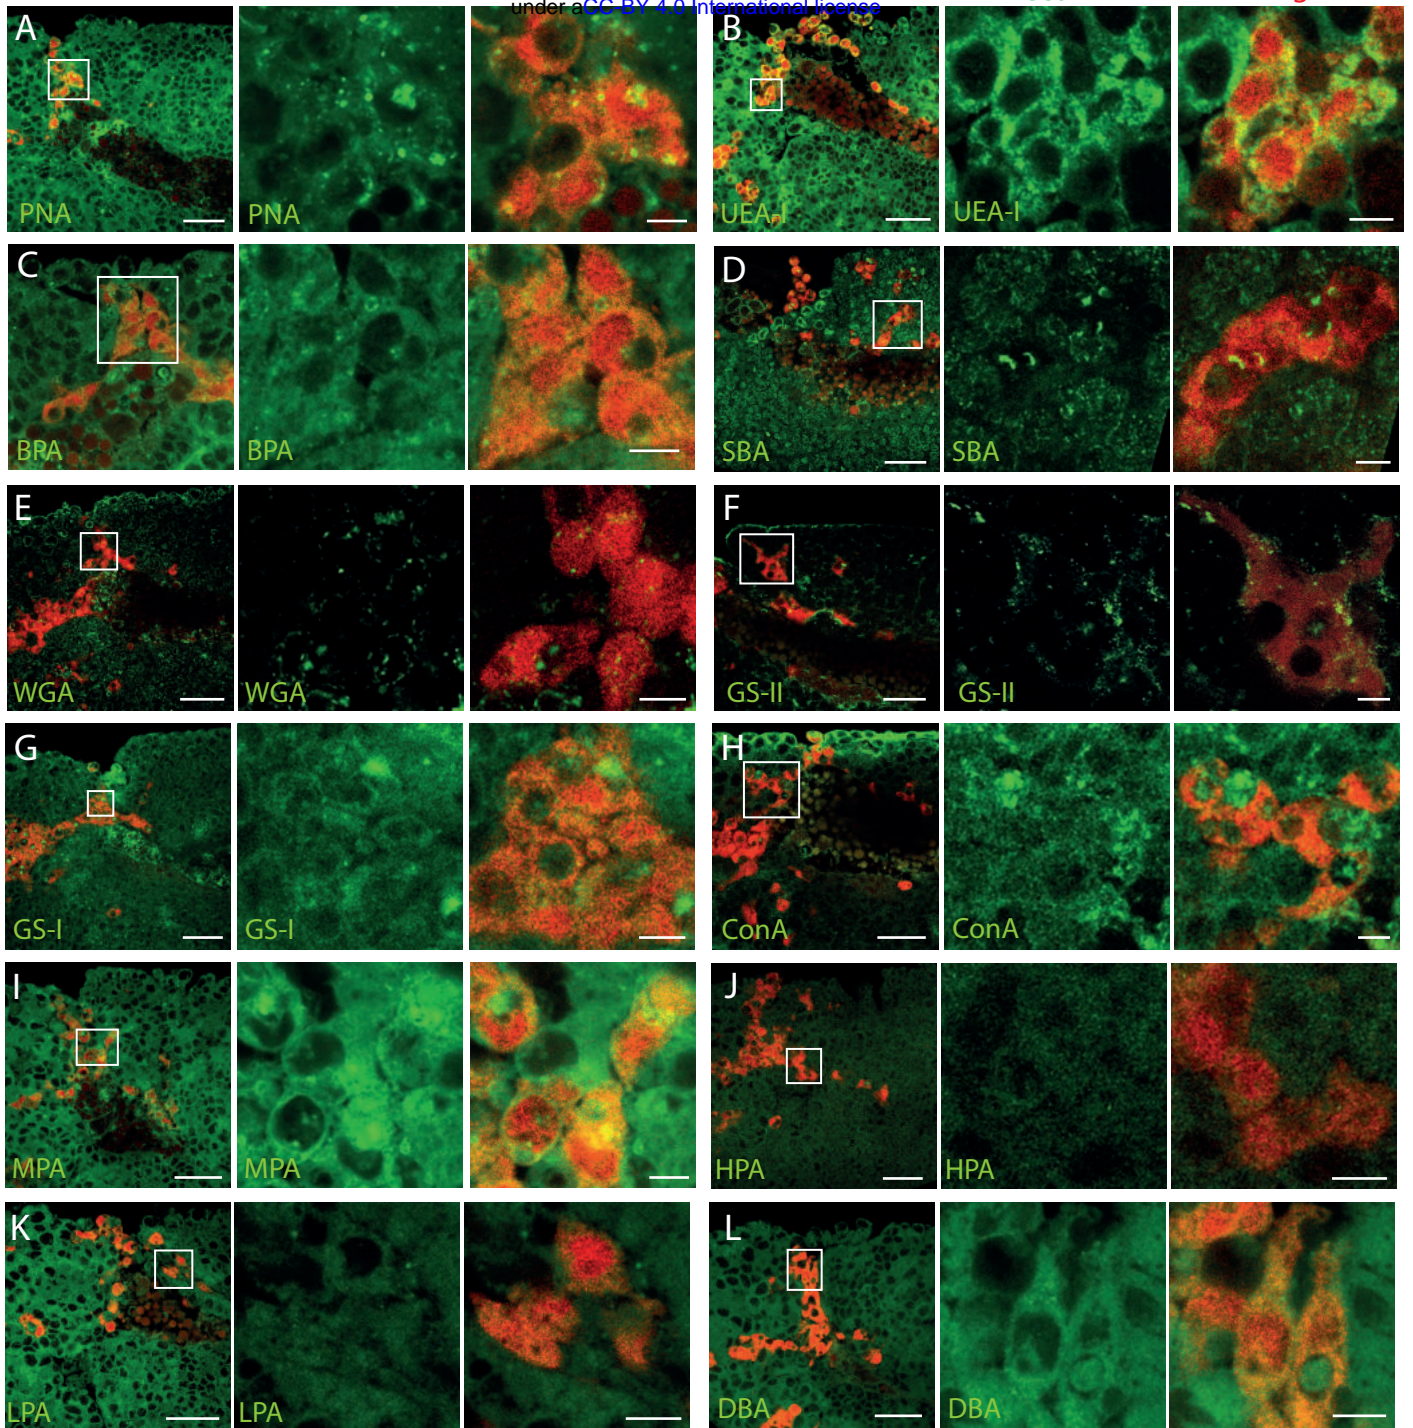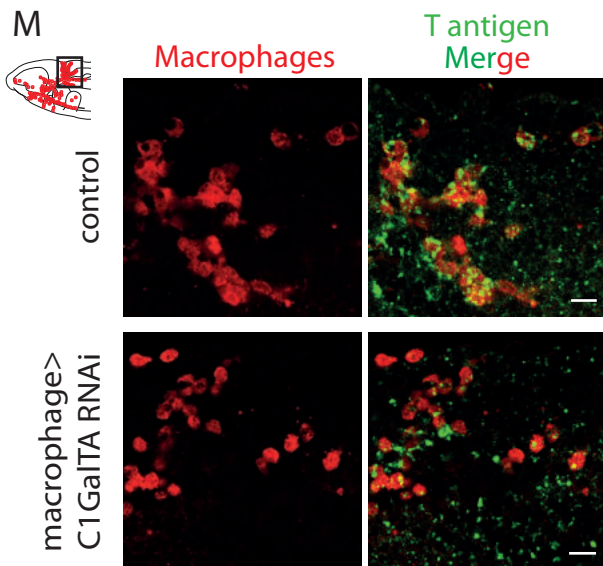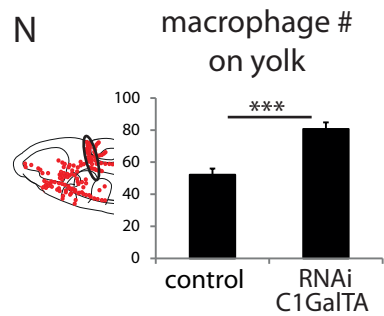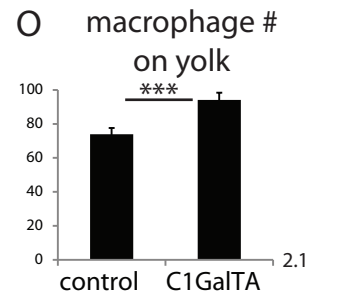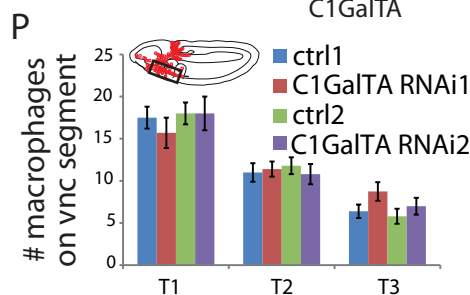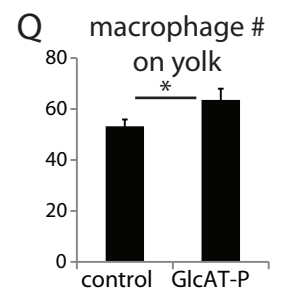

**Figure S1. Related to Figure 1: Lectin screen reveals enriched staining for PNA and UEA-1 on macrophages**

**(A-L)** Confocal images of fixed late Stage 11/ early Stage 12 wild type embryos (schematic above) stained with different lectins (visualized in green) indicated in green type in the lower left corner. Macrophages are detected through *srpHemo-3xmCherry* expression (red). Boxed area in schematic shows area of merged overview image at left. Boxed area in merged overview corresponds to the images shown magnified at right.

**(M)** Confocal images of the germband from fixed early Stage 12 embryos from the control and ones in which *UAS-C1GalTA RNAi* is expressed in macrophages under *srpHemo-GAL4* control. Macrophages visualized with an antibody against GFP expressed in macrophages (*srpHemo>GFP*) (red) and T antigen by antibody staining (green). Boxed area in schematic at left indicates embryo region imaged. **(N,O)** Quantification of macrophages on the yolk in fixed early Stage 12 embryos in **(N)** *srpHemo>UAS-C1GALTA RNAi* (*vdrc 2826*) and **(O)** the *C1GalTA[2.1]* excision mutant shows an increase in both compared to the control ( $n=14-24$ ,  $p=0.00004$  for N,  $p=0.0007$  for O). **(P)** Quantification of macrophage number in the *vnc* segments shown in the schematic in fixed mid Stage 12 embryos detects no difference between control and *srpHemo>UAS-C1GALTA RNAi* embryos ( $n=10-20$ ). **(Q)** Quantification of macrophages on the yolk in fixed early Stage 12 embryos in *GlcAT-PMI05251* shows a 20% increase compared to the control ( $n=17-20$ ,  $p=0.04$ ). Significance was assessed by Mann-Whitney test in N and Student's t-test in O-Q, ns= $p>0.05$ , \*= $p<0.05$ , \*\*\*= $p<0.001$ . Scale bars are 30 $\mu$ m in overview images and 5 $\mu$ m in magnifications in A-L, 10 $\mu$ m in M.



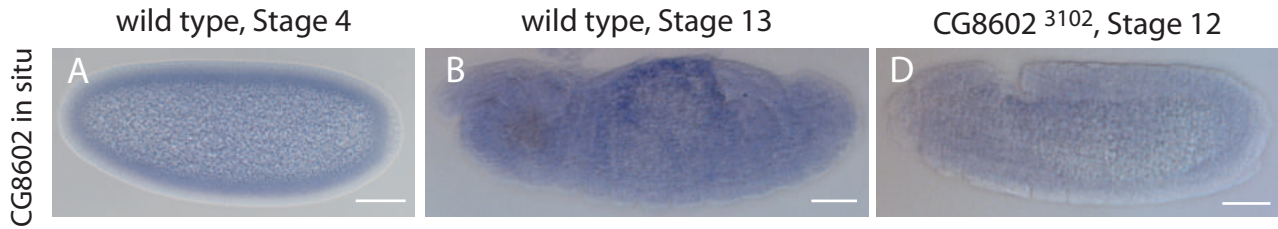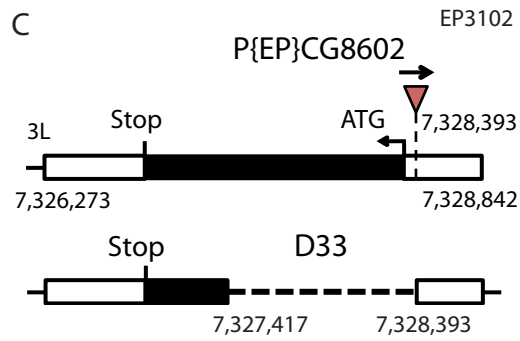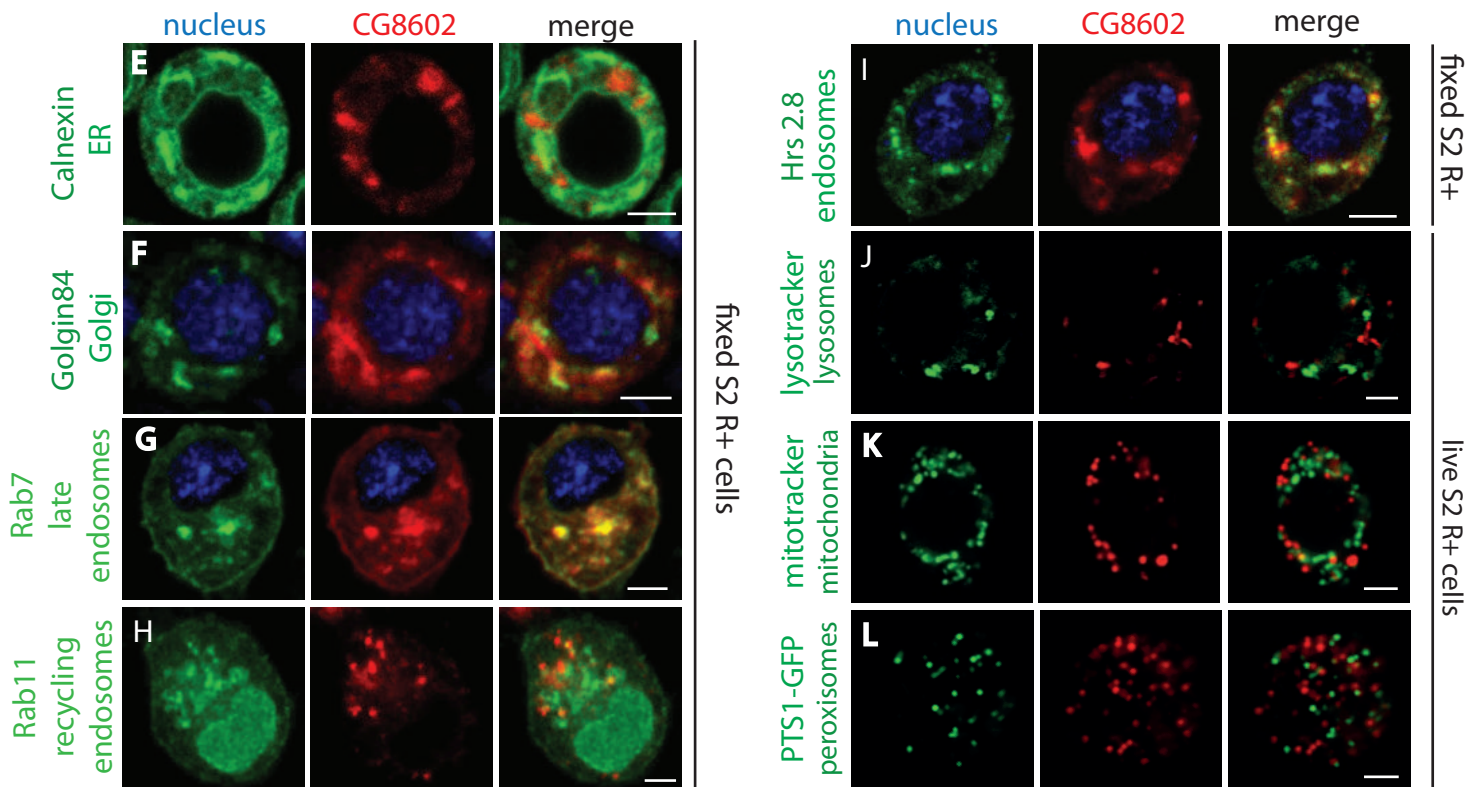

**Figure S2. Related to Figure 2: CG8602 expression and localization**

(A-B, D) *In situ* hybridization of RNA probes against CG8602. In wild type embryos (A) maternally deposited CG8602 RNA is evident in Stage 4 embryos and (B) uniform lower level expression in Stage 13 embryo, with enrichment in the amnioserosa, but none in macrophages. (C) Schematic depicting the CG8602 gene and the insertion site of the EP3102 P element and the  $\Delta 33$  excision mutant induced by P element mobilization which removes 914 bp of the ORF. (D) Expression of CG8602 RNA is strongly reduced in Stage 12 *CG86023102* mutant embryos. (E-L) Confocal images of S2R<sup>+</sup> cells transfected with (E-G) *MT-CG8602::FLAG::HA* visualized by HA antibody staining (red) or (H-L) *srpHemo-CG8602::3xmCherry* with different parts of the endomembrane system visualized by antibody staining as indicated (green). DAPI (blue) marks the nucleus. CG8602 showed (E) no colocalization with the ER marker Calnexin, partial colocalization with the (F) Golgi marker Golgin84, (G) late endosomal marker Rab7, (H) recycling endosome marker Rab11-YFP, and (I) endosomal marker Hrs8.2, no colocalization with (J) lysosome marker lysotracker, (K) mitochondrial marker mitotracker and (L) peroxisomal marker PTS1-GFP in fixed (E-I) or live (J-L) S2R<sup>+</sup> cells. Scale bar is 50 $\mu$ m in A, B and D, 3 $\mu$ m in E-L.

# Valoskova et al., Supplementary File 3

bioRxiv preprint doi: <https://doi.org/10.1101/415547>; this version posted September 12, 2018. The copyright holder for this preprint (which was not certified by peer review) is the author/funder, who has granted bioRxiv a license to display the preprint in perpetuity. It is made available under aCC-BY 4.0 International license.

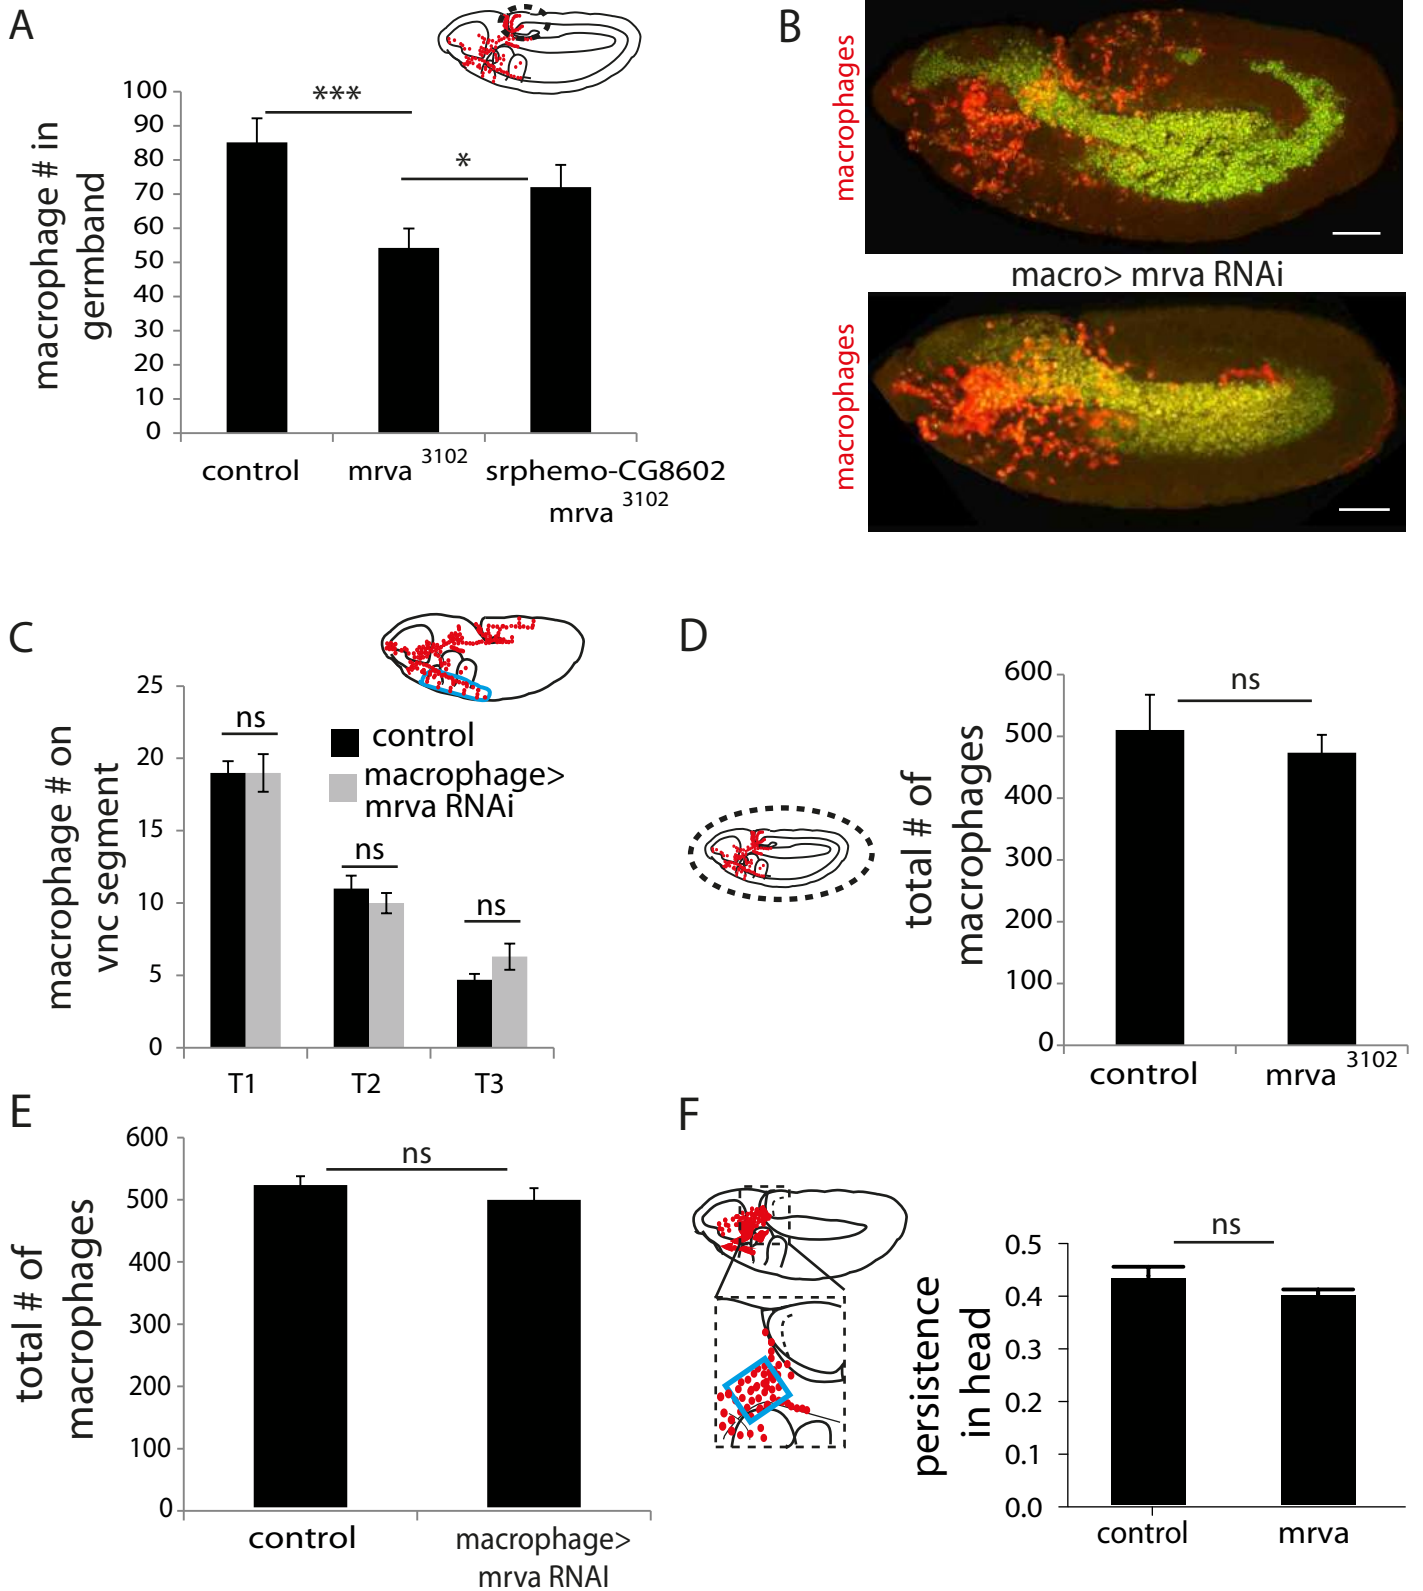

**Figure S3. Related to Figure 3: CG8602 (Minerva) and C1GalT(s)A affect migration into the germband but not along the vnc.** (A) Quantification of the number of macrophages in the germband in embryos from control, *CG86023102*, and *CG86023102 srpHemo(macro)-CG8602::HA* showing CG8602 is required in macrophages for invasion of the germband. Macrophages visualized by *srpHemo-H2A::3xmCherry*. (B) Representative confocal images of early Stage 12 embryos from control and *srpHemo(macro)-Gal4* driving *UAS-minerva RNAi* (v101575) expression in macrophages labeled by H2A-RFP (green) and cytoplasmic GFP (red). (C) Quantification of the number of macrophages in vnc segments reveals no significant difference in macrophage migration along the vnc between control embryos and those expressing an RNAi against CG8602 (v101575) in macrophages under *srpHemo(macro)-GAL4* control (n=19-20, p>0.05). (D, E) Quantification of the total number of macrophages visualized with (D) *srpHemo>mcherry::nls* or (E) *srpHemo>H2A::RFP, GFP* reveals no significant difference between (D) control and *CG86023102* mutant embryos (n=15, p>0.05) and (E) control and *srpHemo(macro)>CG8602 RNAi* embryos (n=26, p=0.1439). The area analyzed is indicated with the black box in the schematic above. (F-I) Quantification of persistence in the head from 2-photon movies with *srpHemo-H2A::3xmCherry* labeling macrophages shows no change in the *mrva3102* compared to the control. n=3. # tracks: control=329, mutant=340, p=0.2182. (G) Quantification of macrophage directionality in the inner vnc shows no change in the *mrva3102* compared to the control n=2,3. # tracks: control=181, mutant=181, p=0.8826. (I) Stills at 0, 60 and 120 min reveal no change in macrophage migration in inner vnc in the *mrva3102* mutant compared to the control. Significance was assessed by One-way Anova in A and Student's t-test in C-F. ns=p>0.05, \* p<0.05, \*\*\* p<0.001. Scale bars are 50µm in B, 30µm in I.

# Valoskova et al Supplementary Figure 4

bioRxiv preprint doi: <https://doi.org/10.1101/415547>; this version posted September 12, 2018. The copyright holder for this preprint (which was not certified by peer review) is the author/funder, who has granted bioRxiv a license to display the preprint in perpetuity. It is made available under aCC-BY 4.0 International license.

A

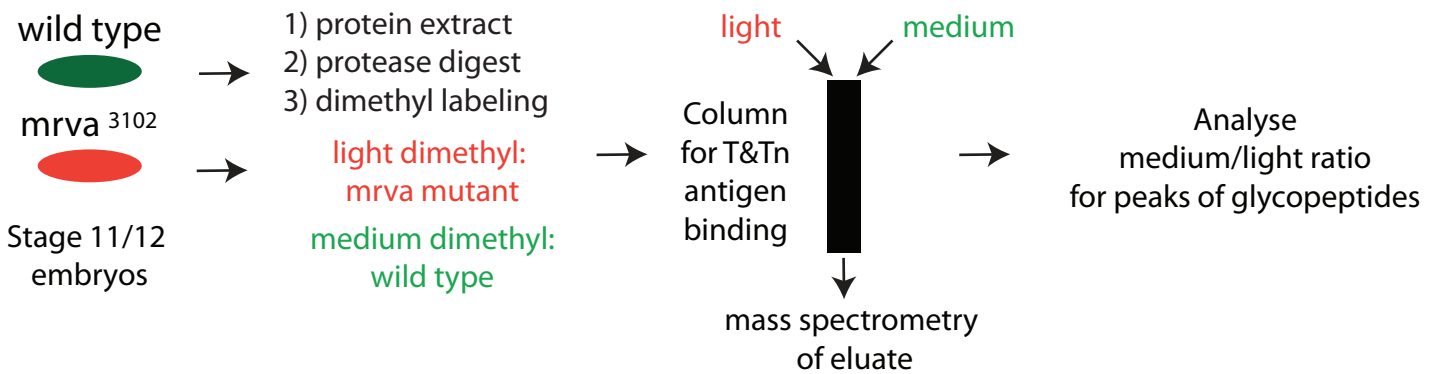

B

## Usage of S/T/Y for T and Tn glycans

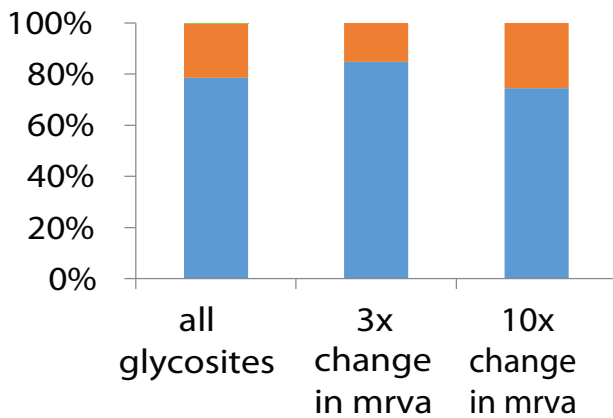

C

## T and Tn modified glycoproteins

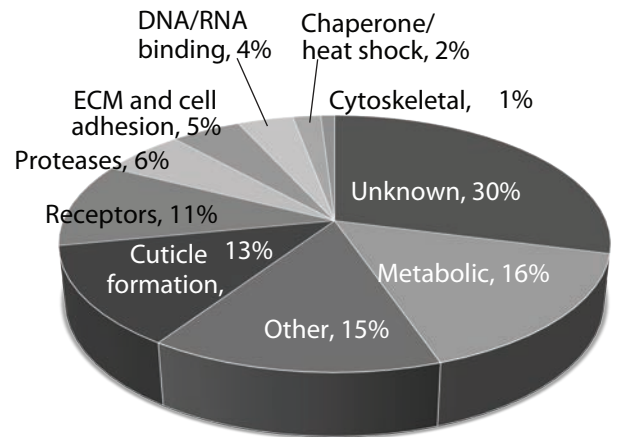

D

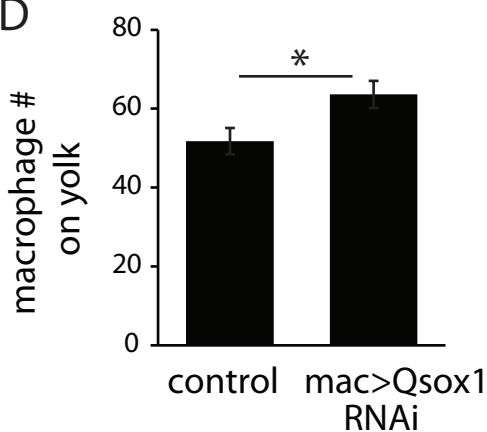

E

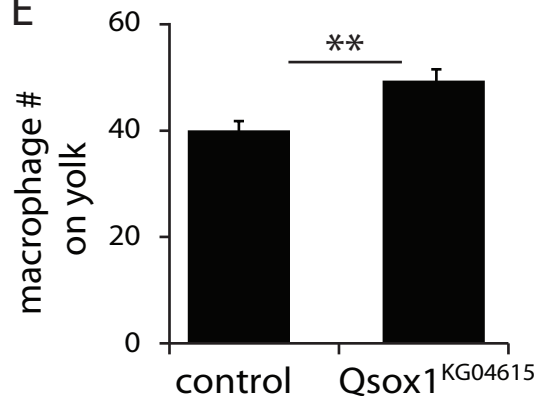

Figure S4. Related to Figure 4 and Table 1: Glycoproteomic analysis and Qsox1 mutant characterization. (A) Work flow for mass spectrometry analysis of T and Tn antigen modification on proteins in Stage 11/12 control and mrva<sup>3102</sup> mutant embryos. (B) Similar usage of serine (S), threonine (T) and tyrosine (Y) for glycosylation in all modified proteins in the control and at glycosites that showed at least a 3 fold and 10 fold change in the mrva3102 mutant. (C) Analysis of the fractional representation of various functions among all T and Tn antigen modified glycoproteins. (D) Increased numbers of macrophages are observed on the yolk neighboring the germband upon knockdown with RNAi v108288 of Qsox1 driven in macrophages by srpHemo-GAL4 (p=0.02) and (E) in the full Qsox1 P element (KG04615) mutant compared to the srp::3xmcherry control (p=0.0018). n=24 and 23 for control and RNAi, n=18 for both control and P element mutant (Student's T-test).

# Valoskova et al Supplementary File 5

A Alignment of *hMfsd1* and *hmmMfsd1*  
 bioRxiv preprint doi: <https://doi.org/10.1101/415547>; this version posted September 12, 2018. The copyright holder for this preprint (which was not certified by peer review) is the author/funder, who has granted bioRxiv a license to display the preprint in perpetuity. It is made available under aCC-BY 4.0 International license.

```

MAREDEERIVDNEEVSRPTEEDQVVS RAGRRDNELSLP SGCCMPSS TSHRFMALVFMCLLGFSGSYFCYDAPGALQNYFKKDLNLTSAQFTLLIYSIYSWPNVLCFVGGFLI
M ED E D + E D V A R + L C PS +HR + L MC LGFGSYFCYD P ALQ K+D+ + + +F L+Y+ YSWPNVLCF+GGFLI
MEDEGE---DRALLGRRREADSAVHGAPRALSA-----CDPSRLAHLVVLVLSLMLCFLGFSGSYFCYDNPAAALQTQVKRDMQVNTTKFMFLYAWYSWPNVLCFLGGFLI
          3          4          5
DRLFGIRLGTIIYMMILLVQQLIFACGGGILDAFWMMILGRFIFGIGAESLAVAQNSYAVLWFKGKELNMVFGQLQLSVARFGSTVNFVWMQPIYIEVSNFYKGTALGVVLLI
DR+FGIR GT+I+ + +GQ+IFA GGI +AFW+M LGRF+FGIG ESLAVAQN+YAV WFKGKELN+VFGQLQLS+AR GSTVN +M +Y + GH LGV L++
DRIFGIRWGTVIFSCFVCIGQVIFALGGIFNAFWLMELGRFVFGIGGESLAVAQNTYAVSWFKGKELNLVFGQLQLSMARIGSTVNMNLMGWLYGKIEALLAGHMTLGVTLMI
          6          7          8
ATLTCVMSMTCALILGWMDKRAERILQRNNNPAGQIPKLTDFVSFKPFFWMSIICVAYYVAIFPFIALGQNFVDRFGLSPAENTVDSLVLIAAVSSPVFGFIIDKLGR
+TC+ S+ CAL L ++D+RAE+IL + G++ KL D+ F P +V +ICV YYVA+FPFI LG+ FF+++F S A+ ++S+VY+I+A SP+EG ++DK G+
GCITCIFSICALALAYLDRRAEKILHKEQKGTGEVIKLRDIKDFSLPLILVFCVICYVAVFPFIFGLGKVFMEKFRFSSQSASAINSIVYIISAPMSPFLGLLVDKTKG
          9          10          11          12
NVTWVFTATLTTIGAHALLTFTQLTPYVGMIMGLSYSMLAASLWPLVALIIPYQLGTAYGFCQSIQNGLGLAVITIVAGIIVDHS GGHEMQLFFMGWLTIALISTGVII
N+ WV A T+ +H +L FT P++ M ++G SYS+LA +LWP+VA I+PE+QLGTAYGF QSIQNGLGLAVI I+AG+I+D G ++ L+++FF+ ++++L++ ++
NIIWVLYAVAATLVSHMMLAFTFWNPWIAMCLLGFYSYLLACALWPMVAFIVPEHQLTAYGFMQSIQNGLGLAVIAILAGMILDSKG--YLLLEVFFIACVSLSLAVVCLY
  
```

AYNNKNRGNLNMTPQORAO  
 N GNLN + +QR +  
 LVNRAQGGNLYSAKQREK

B MC-38  
 Colon Carcinoma  
 MFSD1-eGFP

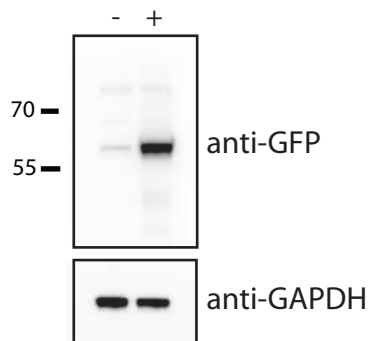

MC-38 Colon Carcinoma

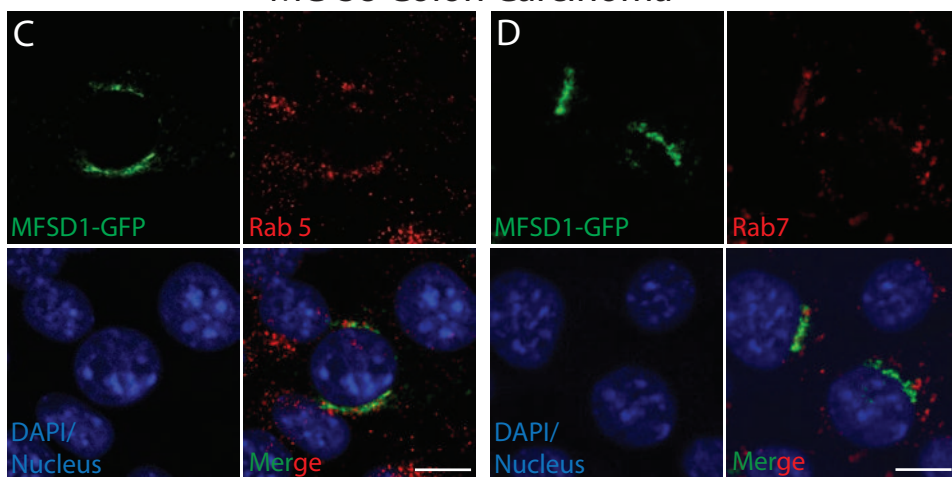

**Figure S5. Related to Figure 5: MFSD1-eGFP localization in colon carcinoma**

(A) Alignment of Minerva and mmMFSD1 by BLAST. The first row in blue type shows the minerva sequence, the second in black identical (one letter symbol) or similar (+) amino acids, and the third in green the mmMFSD1 sequence. Gaps are marked with '-'. The predicted twelve transmembrane domains of Minerva are shown with dark blue lines and numbered above. (B) Western blot of MC-38 colon carcinoma cells with (+) and without (-) the induction of MFSD1-eGFP expression from a lentiviral-transduced vector. MFSD1-eGFP was detected with an anti-GFP antibody. GAPDH serves as a loading control. (C,D) Co-immunofluorescence of mouse MFSD1-eGFP (green) and (C) early endosome marker Rab5 (red) or (D) late endosomes marker Rab7 (red) in MC-38 colon carcinoma cells show little colocalization. (C,D) Nuclei are labeled with DAPI (blue). Scale bars indicate 10 $\mu$ m.
